# Supplementary material for: Reconstruction of Escherichia coli transcriptional regulatory networks via regulon-based associations
Source: PubMed Central journal article supplement (PMC2689187; doi:10.1186/1752-0509-3-39), 2009-04-14
Supplement: 1752-0509-3-39-S3.pdf [file 1752-0509-3-39-S3.pdf]

| Gene Name | Gene BID | Regulator1 | Data Set 1 |            |            | Data Set 2 |            |            | Common     |            |  |
|-----------|----------|------------|------------|------------|------------|------------|------------|------------|------------|------------|--|
|           |          |            | Regulator2 | Regulator3 | Regulator1 | Regulator2 | Regulator3 | Regulator1 | Regulator2 | Regulator3 |  |
| yjbN      | b4049    | GadX       | rpoH       | H-NS       | rpoH       | PhoP       | CpxR       | rpoH       |            |            |  |
| ompF      | b0929    | OmpR       | EnvY       | Lrp        | Lrp        | CpxR       | OmpR       | OmpR       | Lrp        |            |  |
| yjbJ      | b4045    | Fur        | H-NS       | IHF        | IHF        | CRP        | ArcA       | IHF        |            |            |  |
| dinF      | b4044    | LexA       | Fur        | CpxR       | LexA       | CRP        | ArcA       | LexA       |            |            |  |
| lexA      | b4043    | LexA       | Lrp        | CRP        | LexA       | CRP        | ArcA       | LexA       | CRP        |            |  |
| ycbK      | b0926    | ArcA       | IHF        | CRP        | H-NS       | CRP        | IHF        | IHF        | CRP        |            |  |
| ubiA      | b4040    | NarL       | IHF        | ArcA       | NarL       | CpxR       | FNR        | NarL       |            |            |  |
| mukE      | b0923    | SoxS       | H-NS       | MarA       | H-NS       | CpxR       | Fis        | H-NS       |            |            |  |
| mukF      | b0922    | H-NS       | CpxR       | PhoB       | H-NS       | SoxS       | CpxR       | H-NS       | CpxR       |            |  |
| smtA      | b0921    | H-NS       | CpxR       | PhoB       | H-NS       | CpxR       | Fis        | H-NS       | CpxR       |            |  |
| ubiC      | b4039    | NarL       | IHF        | ArcA       | NarL       | Fur        | GadE       | NarL       |            |            |  |
| malM      | b4037    | MalT       | CRP        | Fis        | MalT       | CRP        | FNR        | MalT       | CRP        |            |  |
| lamB      | b4036    | MalT       | CRP        | IHF        | MalT       | CRP        | FNR        | MalT       | CRP        |            |  |
| malK      | b4035    | CRP        | MalT       | FNR        | MalT       | CRP        | FNR        | CRP        | MalT       | FNR        |  |
| malE      | b4034    | MalT       | CRP        | Fis        | MalT       | CRP        | FNR        | MalT       | CRP        |            |  |
| malF      | b4033    | H-NS       | CRP        | Fis        | MalT       | CRP        | FNR        | CRP        |            |            |  |
| malG      | b4032    | CRP        | GntR       | Fis        | MalT       | CRP        | FNR        | CRP        |            |            |  |
| rpsA      | b0911    | FNR        | ArcA       | Fis        | FNR        | Fis        | CRP        | FNR        | Fis        |            |  |
| cmk       | b0910    | FNR        | Fis        | LexA       | Fis        | FNR        | CRP        | FNR        | Fis        |            |  |
| pgi       | b4025    | CRP        | Fis        | FNR        | FNR        | CRP        | IHF        | CRP        | FNR        |            |  |
| aroA      | b0908    | Lrp        | CRP        | MetJ       | Lrp        | CRP        | IHF        | Lrp        | CRP        |            |  |
| lysC      | b4024    | CRP        | FNR        | Lrp        | CRP        | ArgR       | Lrp        | CRP        | Lrp        |            |  |
| serC      | b0907    | Lrp        | CRP        | IHF        | Lrp        | CRP        | IHF        | Lrp        | CRP        | IHF        |  |
| ycaO      | b0905    | CRP        | IHF        | Fis        | Fis        | rpoH       | PurR       | Fis        |            |            |  |
| focA      | b0904    | NarL       | ArcA       | IHF        | NarL       | FNR        | ArcA       | NarL       | ArcA       |            |  |
| pflB      | b0903    | NarL       | ArcA       | IHF        | NarL       | ArcA       | FNR        | NarL       | ArcA       |            |  |
| metH      | b4019    | MetR       | Fur        | Lrp        | MetR       | TyrR       | TrpR       | MetR       |            |            |  |
| aceK      | b4016    | FruR       | IclR       | IHF        | FruR       | IHF        | ArcA       | FruR       | IHF        |            |  |
| aceA      | b4015    | FruR       | IclR       | ArcA       | FruR       | IclR       | ArcA       | FruR       | IclR       | ArcA       |  |
| aceB      | b4014    | IclR       | FruR       | ArcA       | FruR       | IclR       | ArcA       | IclR       | FruR       | ArcA       |  |
| metA      | b4013    | MetJ       | MetR       | rpoH       | MetR       | MetJ       | rpoH       | MetJ       | MetR       | rpoH       |  |
| purH      | b4006    | PhoP       | PurR       | FNR        | PhoP       | PurR       | Lrp        | PhoP       | PurR       |            |  |
| purD      | b4005    | PhoP       | NikR       | GntR       | PhoP       | PurR       | TyrR       | PhoP       |            |            |  |
| hydG      | b4004    | Cbl        | AppY       | CaiF       | MhpR       | AgaR       | Cbl        | Cbl        |            |            |  |
| hupA      | b4000    | Fis        | CRP        | CpxR       | Fis        | CRP        | IHF        | Fis        | CRP        |            |  |
| mtlA      | b3599    | FruR       | Fis        | CRP        | FruR       | Fis        | PhoB       | FruR       | Fis        |            |  |
| aldB      | b3588    | Fis        | CRP        | IHF        | Fis        | CRP        | NtrC       | Fis        | CRP        |            |  |
| upp       | b2498    | FNR        | IHF        | CRP        | FNR        | CRP        | IHF        | FNR        | IHF        | CRP        |  |
| uraA      | b2497    | FNR        | PurR       | IHF        | FNR        | PurR       | IHF        | FNR        | PurR       | IHF        |  |
| b2494     | b2494    | CpxR       | PhoB       | FNR        | CpxR       | PhoP       | CysB       | CpxR       |            |            |  |
| yiaK      | b3575    | GalR       | GalS       | YiaJ       | NarP       | YiaJ       | NtrC       | YiaJ       |            |            |  |
| yial      | b3573    | IclR       | NarL       | ExuR       | NarL       | NarP       | FNR        | NarL       |            |            |  |
| avtA      | b3572    | FlhDC      | TrpR       | IHF        | IHF        | Lrp        | FNR        | IHF        |            |            |  |
| hyfG      | b2487    | FhlA       | HyfR       | AscG       | AgaR       | HyfR       | EvgA       | HyfR       |            |            |  |
| bax       | b3570    | Fis        | FNR        | H-NS       | Fis        | CRP        | FNR        | Fis        | FNR        |            |  |
| hyfF      | b2486    | FhlA       | HyfR       | NarL       | AgaR       | HyfR       | MarR       | HyfR       |            |            |  |
| hyfB      | b2482    | FhlA       | HyfR       | FucR       | HyfR       | FadR       | UxuR       | HyfR       |            |            |  |
| bcp       | b2480    | CRP        | CpxR       | Fur        | CpxR       | CRP        | Lrp        | CRP        | CpxR       |            |  |
| b1391     | b1391    | PaaX       | FlhDC      | ModE       | NagC       | MarA       | FlhDC      | FlhDC      |            |            |  |
| xylR      | b3569    | CaiF       | GntR       | AtoC       | YiaJ       | GntR       | FlhDC      | GntR       |            |            |  |
| xylF      | b3566    | XylR       | Fis        | CRP        | Fis        | FruR       | CRP        | Fis        | CRP        |            |  |
| xylA      | b3565    | XylR       | GntR       | Fis        | FruR       | Fis        | NtrC       | Fis        |            |            |  |
| gcvR      | b2479    | CpxR       | CRP        | Fis        | CRP        | Lrp        | FNR        | CRP        |            |            |  |
| glyQ      | b3560    | rpoH       | CpxR       | FNR        | Fis        | rpoH       | FNR        | rpoH       | FNR        |            |  |
| purC      | b2476    | PurR       | FNR        | CRP        | PurR       | Lrp        | CRP        | PurR       | CRP        |            |  |
| dapE      | b2472    | rpoH       | PhoB       | NhaR       | PhoB       | rpoH       | FlhDC      | rpoH       | PhoB       |            |  |
| acrD      | b2470    | EvgA       | BaeR       | GntR       | BaeR       | RcsAB      | PhoB       | BaeR       |            |            |  |

|        |       |       |       |       |       |       |       |       |      |      |
|--------|-------|-------|-------|-------|-------|-------|-------|-------|------|------|
| tynA   | b1386 | CusR  | NagC  | RcsAB | RcsAB | rpoH  | FlhDC | RcsAB |      |      |
| feaB   | b1385 | GntR  | ModE  | FlhDC | FlhDC | Rob   | rpoH  | FlhDC |      |      |
| feaR   | b1384 | CRP   | Fis   | H-NS  | Fis   | CRP   | IHF   | CRP   | Fis  |      |
| ydbL   | b1383 | PaaX  | IscR  | NarL  | NarL  | PhoB  | FlhDC | NarL  |      |      |
| ldhA   | b1380 | rpoH  | Fis   | IHF   | rpoH  | IHF   | CRP   | rpoH  | IHF  |      |
| glyS   | b3559 | rpoH  | CpxR  | FNR   | Fis   | CpxR  | SoxS  | CpxR  |      |      |
| cspA   | b3556 | Fis   | CRP   | FNR   | CRP   | H-NS  | FNR   | CRP   | FNR  |      |
| yiaG   | b3555 | H-NS  | IHF   | Fis   | CRP   | Lrp   | IHF   | IHF   |      |      |
| yiaD   | b3552 | Fis   | CRP   | FruR  | CRP   | IHF   | ArcA  | CRP   |      |      |
| bisC   | b3551 | DicA  | YiaJ  | UlaR  | PspF  | UlaR  | BaeR  | UlaR  |      |      |
| tkkB   | b2465 | MarA  | SoxS  | H-NS  | SoxS  | Lrp   | IHF   | SoxS  |      |      |
| talA   | b2464 | MarA  | SoxS  | H-NS  | Lrp   | SoxS  | Fis   | SoxS  |      |      |
| b2463  | b2463 | IHF   | ArcA  | CRP   | FlhDC | IHF   | CRP   | IHF   | CRP  |      |
| hslJ   | b1379 | CysB  | RcsAB | rpoH  | CysB  | IHF   | CRP   | CysB  |      |      |
| b2460  | b2460 | HU    | MetJ  | NagC  | NagC  | GntR  | AgaR  | NagC  |      |      |
| b1374  | b1374 | Fur   | CRP   | H-NS  | FNR   | H-NS  | CRP   | CRP   | H-NS |      |
| yagU   | b0287 | Fis   | IHF   | CRP   | CRP   | FNR   | IHF   | IHF   | CRP  |      |
| trs5_5 | b1370 | CytR  | NarL  | LexA  | ArgR  | FlhDC | LexA  | LexA  |      |      |
| yagR   | b0284 | CusR  | NagC  | NtrC  | ArgR  | FlhDC | NtrC  | NtrC  |      |      |
| yagQ   | b0283 | MprA  | Cbl   | CaiF  | MprA  | PhoB  | ArgR  | MprA  |      |      |
| yagP   | b0282 | MetR  | Rob   | CsgD  | CsgD  | LexA  | PhoB  | CsgD  |      |      |
| yagN   | b0280 | SoxS  | MarA  | CRP   | IHF   | CRP   | ArcA  | CRP   |      |      |
| yhjY   | b3548 | EvgA  | GadX  | PhoB  | NtrC  | PhoB  | SoxS  | PhoB  |      |      |
| yhjW   | b3546 | CpxR  | H-NS  | ModE  | LexA  | FruR  | CpxR  | CpxR  |      |      |
| dppA   | b3544 | IHF   | FNR   | Lrp   | IHF   | FNR   | CRP   | IHF   | FNR  |      |
| dppB   | b3543 | IHF   | FNR   | CpxR  | IHF   | FNR   | CRP   | IHF   | FNR  |      |
| dppC   | b3542 | IHF   | FNR   | FruR  | IHF   | FNR   | Lrp   | IHF   | FNR  |      |
| dppD   | b3541 | IHF   | FNR   | CRP   | IHF   | FNR   | CRP   | IHF   | FNR  | CRP  |
| dppF   | b3540 | IHF   | FNR   | CRP   | IHF   | FNR   | CRP   | IHF   | FNR  | CRP  |
| eutJ   | b2454 | AgaR  | AllR  | GntR  | FadR  | NagC  | GntR  | GntR  |      |      |
| b1369  | b1369 | NikR  | FlhDC | ModE  | ArgR  | FlhDC | LexA  | FlhDC |      |      |
| b1364  | b1364 | IscR  | IHF   | CRP   | CpxR  | CRP   | FNR   | CRP   |      |      |
| argF   | b0273 | ArgR  | CRP   | IHF   | ArgR  | IHF   | FNR   | ArgR  | IHF  |      |
| yhjN   | b3532 | PhoB  | BaeR  | NarP  | AgaR  | PhoB  | CsgD  | PhoB  |      |      |
| b2447  | b2447 | AllR  | ModE  | RcsAB | Nac   | RcsAB | ExuR  | RcsAB |      |      |
| ydaT   | b1358 | NikR  | GntR  | RcsAB | RcsAB | ArgR  | NagC  | RcsAB |      |      |
| ydaS   | b1357 | NikR  | FlhDC | NtrC  | FlhDC | rpoH  | CpxR  | FlhDC |      |      |
| ydaR   | b1356 | CRP   | H-NS  | Fis   | CRP   | IHF   | FNR   | CRP   |      |      |
| dctA   | b3528 | DcuR  | ArcA  | CRP   | ArcA  | CRP   | DcuR  | DcuR  | ArcA | CRP  |
| kdgK   | b3526 | TyrR  | PhoB  | FruR  | FruR  | CRP   | ArcA  | FruR  |      |      |
| yhjH   | b3525 | FlhDC | CpxR  | H-NS  | FlhDC | CpxR  | H-NS  | FlhDC | CpxR | H-NS |
| yhjE   | b3523 | Lrp   | CRP   | H-NS  | Lrp   | CRP   | IHF   | Lrp   | CRP  |      |
| b2439  | b2439 | NarL  | NarP  | CpxR  | rpoH  | ArgR  | CpxR  | CpxR  |      |      |
| b2430  | b2430 | CytR  | AgaR  | CdaR  | MarR  | PhoB  | AgaR  | AgaR  |      |      |
| treF   | b3519 | NtrC  | IHF   | FNR   | Ada   | NtrC  | SoxS  | NtrC  |      |      |
| gadA   | b3517 | TorR  | GadE  | GadX  | TorR  | GadX  | GadE  | TorR  | GadE | GadX |
| yhiX   | b3516 | TorR  | GadX  | GadE  | TorR  | GadE  | GadX  | TorR  | GadX | GadE |
| yhiW   | b3515 | FNR   | CRP   | H-NS  | FNR   | H-NS  | CRP   | FNR   | CRP  | H-NS |
| yhiV   | b3514 | NarP  | NarL  | FNR   | ArcA  | MarA  | FNR   | FNR   |      |      |
| yhiE   | b3512 | EvgA  | GadE  | H-NS  | EvgA  | GadE  | H-NS  | EvgA  | GadE | H-NS |
| hdeD   | b3511 | GadE  | GadX  | TorR  | GadE  | GadX  | H-NS  | GadE  | GadX |      |
| hdeA   | b3510 | MarA  | TorR  | GadE  | TorR  | MarA  | GadE  | MarA  | TorR | GadE |
| cysP   | b2425 | CysB  | IHF   | CRP   | CysB  | IHF   | H-NS  | CysB  | IHF  |      |
| cysU   | b2424 | CysB  | IHF   | FNR   | CysB  | IHF   | H-NS  | CysB  | IHF  |      |
| cysW   | b2423 | CysB  | IHF   | ArgR  | CysB  | IHF   | FlhDC | CysB  | IHF  |      |
| cysA   | b2422 | CysB  | IHF   | CRP   | CysB  | IHF   | H-NS  | CysB  | IHF  |      |
| cysM   | b2421 | CysB  | IHF   | CRP   | CysB  | IHF   | Lrp   | CysB  | IHF  |      |
| fnr    | b1334 | CpxR  | FNR   | Fis   | ArcA  | FNR   | CRP   | FNR   |      |      |
| ynaJ   | b1332 | NarP  | FNR   | NarL  | CRP   | ArcA  | FNR   | FNR   |      |      |

|       |       |       |       |       |      |       |       |       |      |      |
|-------|-------|-------|-------|-------|------|-------|-------|-------|------|------|
| b1330 | b1330 | CpxR  | Fis   | RcsAB | MarA | CpxR  | CRP   | CpxR  |      |      |
| phoE  | b0241 | PhoB  | H-NS  | CRP   | PhoB | AllR  | ArgR  | PhoB  |      |      |
| hdeB  | b3509 | MarA  | TorR  | GadX  | MarA | TorR  | GadE  | MarA  | TorR |      |
| slp   | b3506 | MarA  | H-NS  | FNR   | MarA | H-NS  | ArcA  | MarA  | H-NS |      |
| yfeK  | b2419 | CueR  | CpxR  | ModE  | NarP | NarL  | CpxR  | CpxR  |      |      |
| arsB  | b3502 | TdcA  | TdcR  | RcsAB | YiaJ | RcsAB | AllR  | RcsAB |      |      |
| pdxK  | b2418 | CaiF  | OxyR  | SoxS  | TyrR | SoxS  | Nac   | SoxS  |      |      |
| crr   | b2417 | DgsA  | FruR  | FadR  | FruR | DgsA  | CRP   | DgsA  | FruR |      |
| gor   | b3500 | OxyR  | UlaR  | FhlA  | OxyR | rpoH  | GntR  | OxyR  |      |      |
| ptsI  | b2416 | DgsA  | FruR  | CRP   | FruR | Fis   | CRP   | FruR  | CRP  |      |
| ptsH  | b2415 | DgsA  | FruR  | CRP   | FruR | DgsA  | CRP   | DgsA  | FruR | CRP  |
| cysK  | b2414 | CysB  | IHF   | CRP   | CysB | IHF   | CRP   | CysB  | IHF  | CRP  |
| b1329 | b1329 | FlhDC | GalR  | GalS  | FNR  | CRP   | FlhDC | FlhDC |      |      |
| lig   | b2411 | GntR  | PhoB  | FlhDC | IscR | PhoB  | RcsAB | PhoB  |      |      |
| b1327 | b1327 | Zur   | CpxR  | LexA  | CpxR | NagC  | FlhDC | CpxR  |      |      |
| tpx   | b1324 | Fur   | OxyR  | FNR   | ArcA | FNR   | FruR  | FNR   |      |      |
| tyrR  | b1323 | TyrR  | LrhA  | RcsAB | TyrR | SoxS  | PhoP  | TyrR  |      |      |
| gpt   | b0238 | Fis   | H-NS  | FNR   | Fis  | CRP   | IHF   | Fis   |      |      |
| ycjF  | b1322 | rpoH  | H-NS  | Fur   | rpoH | UxuR  | SoxS  | rpoH  |      |      |
| pepD  | b0237 | CsgD  | rpoH  | FNR   | CsgD | FNR   | Fis   | CsgD  | FNR  |      |
| ycjX  | b1321 | rpoH  | DnaA  | GlpR  | rpoH | CRP   | IHF   | rpoH  |      |      |
| yafP  | b0234 | LexA  | Cbl   | Nac   | Nac  | rpoH  | CpxR  | LexA  |      |      |
| yafO  | b0233 | LexA  | CpxR  | ModE  | LexA | CRP   | ArcA  | LexA  |      |      |
| yafN  | b0232 | Zur   | LexA  | Cbl   | LexA | CRP   | FNR   | LexA  |      |      |
| dinP  | b0231 | LexA  | CpxR  | H-NS  | LexA | CRP   | ArcA  | LexA  |      |      |
| xapA  | b2407 | GntR  | LsrR  | YiaJ  | ArgR | RcsAB | GntR  | GntR  |      |      |
| gltX  | b2400 | FNR   | CRP   | Fis   | LexA | GadE  | Fis   | Fis   |      |      |
| dinJ  | b0226 | OxyR  | rpoH  | CpxR  | CpxR | CRP   | FNR   | CpxR  |      |      |
| yafK  | b0224 | Fur   | Fis   | IHF   | Fis  | CRP   | IHF   | Fis   | IHF  |      |
| yafH  | b0221 | FadR  | ArcA  | CRP   | FadR | ArgR  | NtrC  | FadR  |      |      |
| ykfE  | b0220 | IHF   | FNR   | CRP   | CRP  | Lrp   | IHF   | IHF   | CRP  |      |
| ycjM  | b1309 | AgaR  | LexA  | HU    | Fis  | rpoH  | LexA  | LexA  |      |      |
| pspE  | b1308 | PspF  | IHF   | CRP   | PspF | IHF   | CRP   | PspF  | IHF  | CRP  |
| pspD  | b1307 | PspF  | NsrR  | IHF   | PspF | ArgR  | rpoH  | PspF  |      |      |
| pspC  | b1306 | PspF  | RcsAB | IHF   | PspF | IHF   | rpoH  | PspF  | IHF  |      |
| pspB  | b1305 | PspF  | IHF   | CRP   | PspF | IHF   | ArcA  | PspF  | IHF  |      |
| pspA  | b1304 | PspF  | IHF   | CRP   | PspF | IHF   | NtrC  | PspF  | IHF  |      |
| pspF  | b1303 | DicA  | PspF  | LrhA  | PspF | NagC  | PhoB  | PspF  |      |      |
| aldH  | b1300 | IHF   | CRP   | FNR   | NtrC | PhoB  | IHF   | IHF   |      |      |
| dnaQ  | b0215 | PhoB  | CpxR  | Fur   | CysB | CpxR  | FlhDC | CpxR  |      |      |
| gloB  | b0212 | DnaA  | SoxS  | PhoB  | PhoB | Fis   | CpxR  | PhoB  |      |      |
| dniR  | b0211 | rpoH  | Fis   | CRP   | CRP  | IHF   | FNR   | CRP   |      |      |
| yafD  | b0209 | Fur   | CpxR  | Fis   | Fis  | CpxR  | rpoH  | CpxR  | Fis  |      |
| nac   | b1988 | Nac   | NtrC  | CRP   | Nac  | NtrC  | ArcA  | Nac   | NtrC |      |
| cbl   | b1987 | CysB  | NtrC  | CRP   | NtrC | CysB  | ArcA  | CysB  | NtrC |      |
| b1983 | b1983 | H-NS  | Fis   | CRP   | CRP  | CpxR  | ArcA  | CRP   |      |      |
| ycaC  | b0897 | BaeR  | H-NS  | FNR   | BaeR | H-NS  | Lrp   | BaeR  | H-NS |      |
| dmsC  | b0896 | ModE  | NarL  | NarP  | NarL | ModE  | Fur   | ModE  | NarL |      |
| dmsA  | b0894 | ModE  | NarL  | FNR   | ModE | NarL  | FNR   | ModE  | NarL | FNR  |
| serS  | b0893 | ArcA  | CRP   | FNR   | NarL | FNR   | Fis   | FNR   |      |      |
| ftsK  | b0890 | LexA  | Nac   | TyrR  | LexA | NagC  | H-NS  | LexA  |      |      |
| b1976 | b1976 | CpxR  | FNR   | H-NS  | CRP  | IHF   | FNR   | FNR   |      |      |
| b1973 | b1973 | SoxS  | Fur   | MelR  | SoxS | Fur   | CRP   | SoxS  | Fur  |      |
| trxB  | b0888 | SoxS  | H-NS  | Fis   | Fis  | FNR   | IHF   | Fis   |      |      |
| cydD  | b0887 | NarL  | NtrC  | PhoB  | NarL | PhoB  | NtrC  | NarL  | NtrC | PhoB |
| b1971 | b1971 | FlhDC | CRP   | Fis   | FNR  | IHF   | CRP   | CRP   |      |      |
| cydC  | b0886 | NarL  | Fur   | Fis   | NarL | PhoB  | PhoP  | NarL  |      |      |
| infA  | b0884 | Fis   | FNR   | CRP   | CRP  | Fis   | FNR   | Fis   | FNR  | CRP  |
| clpA  | b0882 | CRP   | ArcA  | IHF   | CRP  | FNR   | ArcA  | CRP   | ArcA |      |

|       |       |       |       |       |       |       |       |       |       |      |
|-------|-------|-------|-------|-------|-------|-------|-------|-------|-------|------|
| yIjA  | b0881 | FruR  | IHF   | Lrp   | IHF   | H-NS  | CRP   | IHF   |       |      |
| cspD  | b0880 | H-NS  | FruR  | NtrC  | H-NS  | CRP   | ArcA  | H-NS  |       |      |
| yedV  | b1968 | CRP   | CpxR  | Fur   | FNR   | CRP   | PhoB  | CRP   |       |      |
| yedU  | b1967 | Fis   | FNR   | CRP   | CRP   | IHF   | FNR   | FNR   | CRP   |      |
| b1964 | b1964 | GntR  | FlhDC | CpxR  | LexA  | Fis   | CpxR  | CpxR  |       |      |
| ybjZ  | b0879 | rpoH  | PhoB  | DnaA  | rpoH  | IHF   | CpxR  | rpoH  |       |      |
| ybjX  | b0877 | CRP   | FNR   | H-NS  | FNR   | IHF   | CRP   | CRP   | FNR   |      |
| dcm   | b1961 | FlhDC | H-NS  | GadE  | NarP  | FlhDC | LexA  | FlhDC |       |      |
| hcp   | b0873 | MngR  | NarP  | AtoC  | NarP  | NarL  | FlhDC | NarP  |       |      |
| poxB  | b0871 | MarA  | SoxS  | Fis   | SoxS  | MarA  | IHF   | MarA  | SoxS  |      |
| yedI  | b1958 | PhoB  | NtrC  | FruR  | TrpR  | rpoH  | NtrC  | NtrC  |       |      |
| b1956 | b1956 | PhoP  | rpoH  | CpxR  | ArgR  | CpxR  | NtrC  | CpxR  |       |      |
| b1955 | b1955 | MarA  | Lrp   | OmpR  | NtrC  | Lrp   | PhoP  | Lrp   |       |      |
| b1953 | b1953 | FruR  | OxyR  | Fis   | Fis   | CRP   | IHF   | Fis   |       |      |
| rcaA  | b1951 | RcsAB | GadE  | FlhDC | RcsAB | GadE  | H-NS  | RcsAB | GadE  |      |
| fliR  | b1950 | FlhDC | RcsAB | H-NS  | FlhDC | H-NS  | FNR   | FlhDC | H-NS  |      |
| ybjP  | b0865 | IHF   | FNR   | SoxS  | Lrp   | IHF   | Fis   | IHF   |       |      |
| artP  | b0864 | FlhDC | IHF   | CpxR  | CRP   | ArcA  | IHF   | IHF   |       |      |
| artJ  | b0860 | ArgR  | CRP   | IHF   | ArgR  | CRP   | IHF   | ArgR  | CRP   | IHF  |
| fliQ  | b1949 | FlhDC | RcsAB | H-NS  | FlhDC | H-NS  | FNR   | FlhDC | H-NS  |      |
| fliP  | b1948 | FlhDC | CRP   | FNR   | FlhDC | H-NS  | FNR   | FlhDC | FNR   |      |
| fliO  | b1947 | FlhDC | RcsAB | H-NS  | FlhDC | H-NS  | CpxR  | FlhDC | H-NS  |      |
| fliN  | b1946 | FlhDC | H-NS  | CpxR  | FlhDC | H-NS  | FNR   | FlhDC | H-NS  |      |
| fliM  | b1945 | FlhDC | ArcA  | CRP   | FlhDC | H-NS  | FNR   | FlhDC |       |      |
| fliL  | b1944 | FlhDC | FNR   | ArcA  | FlhDC | H-NS  | FNR   | FlhDC | FNR   |      |
| ybjF  | b0859 | Nac   | PurR  | Fis   | ExuR  | PhoB  | PurR  | PurR  |       |      |
| fliK  | b1943 | FlhDC | FNR   | IHF   | FlhDC | H-NS  | FNR   | FlhDC | FNR   |      |
| fliJ  | b1942 | FlhDC | FNR   | ArcA  | FlhDC | H-NS  | FNR   | FlhDC | FNR   |      |
| potI  | b0857 | AllR  | NtrC  | MngR  | NtrC  | Nac   | ArgR  | NtrC  |       |      |
| fliI  | b1941 | FlhDC | FNR   | IHF   | FlhDC | H-NS  | CpxR  | FlhDC |       |      |
| potH  | b0856 | NtrC  | Nac   | ArgR  | NtrC  | TrpR  | CpxR  | NtrC  |       |      |
| fliH  | b1940 | FlhDC | H-NS  | FNR   | FlhDC | H-NS  | FNR   | FlhDC | H-NS  | FNR  |
| potG  | b0855 | NtrC  | ArgR  | Nac   | NtrC  | CpxR  | TrpR  | NtrC  |       |      |
| potF  | b0854 | NtrC  | H-NS  | CRP   | NtrC  | Lrp   | CRP   | NtrC  | CRP   |      |
| ybjN  | b0853 | SoxS  | TyrR  | CsgD  | SoxS  | Fis   | CRP   | SoxS  |       |      |
| rimK  | b0852 | SoxS  | OxyR  | GadX  | SoxS  | Agar  | ZraR  | SoxS  |       |      |
| mdaA  | b0851 | SoxS  | FruR  | Lrp   | SoxS  | Fis   | FNR   | SoxS  |       |      |
| ybjC  | b0850 | SoxS  | ExuR  | ModE  | SoxS  | Fis   | MarA  | SoxS  |       |      |
| fliG  | b1939 | FlhDC | H-NS  | FNR   | FlhDC | H-NS  | FNR   | FlhDC | H-NS  | FNR  |
| fliF  | b1938 | FlhDC | H-NS  | FNR   | FlhDC | H-NS  | FNR   | FlhDC | H-NS  | FNR  |
| fliE  | b1937 | FlhDC | NtrC  | Agar  | FlhDC | H-NS  | FNR   | FlhDC |       |      |
| yedN  | b1934 | NtrC  | FlhDC | H-NS  | FlhDC | CpxR  | H-NS  | FlhDC | H-NS  |      |
| grxA  | b0849 | OxyR  | MetJ  | UlaR  | OxyR  | CRP   | FNR   | OxyR  |       |      |
| b1933 | b1933 | rpoH  | H-NS  | IHF   | FlhDC | H-NS  | CpxR  | H-NS  |       |      |
| ybjG  | b0841 | PhoP  | UlaR  | MarA  | PhoP  | ArcA  | IHF   | PhoP  |       |      |
| deoR  | b0840 | PhoP  | Nac   | NarL  | PhoP  | PhoB  | Rob   | PhoP  |       |      |
| yedE  | b1929 | FNR   | CpxR  | IHF   | CRP   | IHF   | FNR   | FNR   | IHF   |      |
| amyA  | b1927 | OmpR  | RcsAB | NtrC  | NtrC  | Lrp   | IHF   | NtrC  |       |      |
| fliT  | b1926 | FlhDC | CpxR  | GadE  | FlhDC | H-NS  | FNR   | FlhDC |       |      |
| fliS  | b1925 | FlhDC | CpxR  | GadE  | FlhDC | H-NS  | FNR   | FlhDC |       |      |
| fliD  | b1924 | FlhDC | CpxR  | GadE  | FlhDC | H-NS  | FNR   | FlhDC |       |      |
| dacC  | b0839 | PhoP  | FNR   | CRP   | FNR   | PhoB  | ArcA  | FNR   |       |      |
| fliC  | b1923 | GadE  | H-NS  | FlhDC | GadE  | H-NS  | CpxR  | GadE  | H-NS  |      |
| fliA  | b1922 | FlhDC | H-NS  | CpxR  | FlhDC | H-NS  | CpxR  | FlhDC | H-NS  | CpxR |
| fliZ  | b1921 | FlhDC | H-NS  | CpxR  | FlhDC | H-NS  | FNR   | FlhDC | H-NS  |      |
| b0836 | b0836 | NarL  | FNR   | ArcA  | ArcA  | FNR   | CRP   | FNR   | ArcA  |      |
| fliY  | b1920 | H-NS  | FlhDC | IHF   | H-NS  | FlhDC | IHF   | H-NS  | FlhDC | IHF  |
| yedO  | b1919 | H-NS  | Lrp   | FNR   | FlhDC | Lrp   | FNR   | Lrp   | FNR   |      |
| uvrY  | b1914 | LexA  | AsnC  | GadX  | LexA  | CRP   | CpxR  | LexA  |       |      |

|       |       |       |        |        |       |        |        |       |      |     |  |
|-------|-------|-------|--------|--------|-------|--------|--------|-------|------|-----|--|
| uvrC  | b1913 | LexA  | rpoH   | PurR   | LexA  | CpxR   | rpoH   | LexA  | rpoH |     |  |
| ybiK  | b0828 | CysB  | IHF    | CRP    | IHF   | FliHDC | H-NS   | IHF   |      |     |  |
| moeA  | b0827 | NarL  | PrpR   | OxyR   | NarL  | FNR    | rpoH   | NarL  |      |     |  |
| ybiT  | b0820 | rpoH  | PhoB   | FNR    | FadR  | Fis    | rpoH   | rpoH  |      |     |  |
| yecA  | b1908 | PhoB  | FliHDC | CRP    | Fis   | PhoB   | ArcA   | PhoB  |      |     |  |
| tyrP  | b1907 | HU    | TyrR   | PdhR   | HU    | TyrR   | Fur    | HU    | TyrR |     |  |
| ftn   | b1905 | Fur   | IHF    | FNR    | IHF   | CRP    | FNR    | IHF   | FNR  |     |  |
| yecI  | b1902 | CpxR  | HcaR   | ArgR   | CpxR  | CRP    | FNR    | CpxR  |      |     |  |
| araF  | b1901 | AraC  | GntR   | GalR   | CRP   | AraC   | H-NS   | AraC  |      |     |  |
| araG  | b1900 | AraC  | RcsAB  | GadE   | CRP   | AraC   | H-NS   | AraC  |      |     |  |
| ybiP  | b0815 | H-NS  | Fur    | Fis    | Fur   | FliHDC | NarL   | Fur   |      |     |  |
| ompX  | b0814 | FNR   | CRP    | IHF    | FNR   | CRP    | IHF    | FNR   | CRP  | IHF |  |
| dps   | b0812 | OxyR  | IHF    | FNR    | OxyR  | IHF    | CRP    | OxyR  | IHF  |     |  |
| glnH  | b0811 | NtrC  | IHF    | CRP    | NtrC  | IHF    | Fis    | NtrC  | IHF  |     |  |
| glnP  | b0810 | NtrC  | IHF    | CRP    | NtrC  | IHF    | Fis    | NtrC  | IHF  |     |  |
| glnQ  | b0809 | NtrC  | Fis    | IHF    | NtrC  | Fis    | IHF    | NtrC  | Fis  | IHF |  |
| b0805 | b0805 | Fur   | CRP    | ArgR   | Fur   | CRP    | IHF    | Fur   | CRP  |     |  |
| prfC  | b3498 | CRP   | rpoH   | LexA   | rpoH  | Fis    | IHF    | rpoH  |      |     |  |
| uspA  | b3495 | FadR  | CRP    | Fis    | FadR  | CRP    | IHF    | FadR  | CRP  |     |  |
| pitA  | b3493 | ArgR  | FruR   | Fis    | FNR   | Fis    | IHF    | Fis   |      |     |  |
| yhiN  | b3492 | FruR  | CpxR   | FliHDC | rpoH  | LexA   | CpxR   | CpxR  |      |     |  |
| nikE  | b3480 | NhaR  | NikR   | MprA   | NarL  | NikR   | NarP   | NikR  |      |     |  |
| nupC  | b2393 | Nac   | CytR   | IHF    | Nac   | CytR   | CRP    | Nac   | CytR |     |  |
| b2392 | b2392 | Fur   | IHF    | CRP    | Fur   | IHF    | CRP    | Fur   | IHF  | CRP |  |
| b2390 | b2390 | Fur   | CpxR   | IHF    | RcsAB | CpxR   | FliHDC | CpxR  |      |     |  |
| nikD  | b3479 | NikR  | NarL   | GntR   | NarL  | NikR   | FNR    | NikR  | NarL |     |  |
| nikC  | b3478 | NikR  | IscR   | NarP   | NarL  | NikR   | FNR    | NikR  |      |     |  |
| nikB  | b3477 | NikR  | NarP   | NarL   | NarL  | NikR   | FliHDC | NikR  | NarL |     |  |
| nikA  | b3476 | NikR  | NarL   | FNR    | NarL  | NikR   | FNR    | NikR  | NarL | FNR |  |
| glk   | b2388 | FruR  | Fis    | H-NS   | Fur   | FNR    | CRP    | FruR  |      |     |  |
| ycjC  | b1299 | PhoB  | NtrC   | CdaR   | NtrC  | PhoB   | Fur    | PhoB  | NtrC |     |  |
| ycjL  | b1298 | CRP   | IHF    | FNR    | NtrC  | IHF    | Fis    | IHF   |      |     |  |
| b1297 | b1297 | CRP   | FNR    | IHF    | NtrC  | IHF    | Fis    | IHF   |      |     |  |
| b2379 | b2379 | PhoB  | PurR   | FruR   | PhoB  | SoxS   | Rob    | PhoB  |      |     |  |
| ddg   | b2378 | Fis   | H-NS   | CRP    | FNR   | CRP    | IHF    | CRP   |      |     |  |
| rpoH  | b3461 | CytR  | DnaA   | IHF    | CytR  | rpoH   | LexA   | CytR  |      |     |  |
| livJ  | b3460 | Lrp   | CRP    | IHF    | Lrp   | CRP    | IHF    | Lrp   | CRP  | IHF |  |
| b2374 | b2374 | NanR  | PhoP   | CpxR   | CpxR  | FNR    | H-NS   | CpxR  |      |     |  |
| fabI  | b1288 | FruR  | CpxR   | FNR    | Fis   | FruR   | rpoH   | FruR  |      |     |  |
| yciW  | b1287 | CysB  | IHF    | CRP    | IHF   | CRP    | H-NS   | IHF   | CRP  |     |  |
| evgS  | b2370 | EvgA  | HyfR   | BaeR   | EvgA  | PhoB   | AgaR   | EvgA  |      |     |  |
| rnb   | b1286 | Fis   | CRP    | FNR    | CRP   | IHF    | FNR    | CRP   | FNR  |     |  |
| yciR  | b1285 | Fur   | GadE   | NtrC   | CpxR  | NtrC   | Fur    | Fur   | NtrC |     |  |
| abc   | b0199 | MetJ  | CRP    | IHF    | MetJ  | CRP    | IHF    | MetJ  | CRP  | IHF |  |
| osmB  | b1283 | RcsAB | IHF    | CRP    | RcsAB | CRP    | H-NS   | RcsAB | CRP  |     |  |
| yaeE  | b0198 | MetJ  | rpoH   | FNR    | MetJ  | rpoH   | CRP    | MetJ  | rpoH |     |  |
| yaeC  | b0197 | MetJ  | CRP    | NtrC   | MetJ  | IHF    | CRP    | MetJ  | CRP  |     |  |
| pyrF  | b1281 | Nac   | Fis    | PurR   | Fis   | CRP    | IHF    | Fis   |      |     |  |
| rscF  | b0196 | CRP   | FNR    | Fis    | CpxR  | Lrp    | Fis    | Fis   |      |     |  |
| cutF  | b0192 | MtlR  | OxyR   | PhoP   | PhoP  | CpxR   | Cbl    | PhoP  |      |     |  |
| livK  | b3458 | Lrp   | IHF    | CRP    | Lrp   | CRP    | IHF    | Lrp   | IHF  | CRP |  |
| livH  | b3457 | Lrp   | MetJ   | ArgR   | Lrp   | TyrR   | TrpR   | Lrp   |      |     |  |
| livM  | b3456 | Lrp   | IHF    | CRP    | Lrp   | TyrR   | IHF    | Lrp   | IHF  |     |  |
| livG  | b3455 | Lrp   | IHF    | PhoB   | Lrp   | IHF    | CRP    | Lrp   | IHF  |     |  |
| livF  | b3454 | Lrp   | IHF    | ArgR   | Lrp   | TrpR   | IHF    | Lrp   | IHF  |     |  |
| ugpB  | b3453 | PhoB  | CRP    | ArcA   | PhoB  | NtrC   | Fis    | PhoB  |      |     |  |
| evgA  | b2369 | EvgA  | LexA   | CpxR   | EvgA  | CRP    | H-NS   | EvgA  |      |     |  |
| ugpA  | b3452 | PhoB  | FruR   | Lrp    | PhoB  | NtrC   | FruR   | PhoB  | FruR |     |  |
| ugpE  | b3451 | PhoB  | GntR   | AraC   | PhoB  | NtrC   | Fis    | PhoB  |      |     |  |

|       |       |       |       |       |       |       |       |       |      |      |
|-------|-------|-------|-------|-------|-------|-------|-------|-------|------|------|
| emrY  | b2367 | EvgA  | AllR  | XylR  | EvgA  | NagC  | CpxR  | EvgA  |      |      |
| ugpC  | b3450 | SoxS  | PhoB  | SdiA  | PhoB  | PrpR  | Cbl   | PhoB  |      |      |
| dsdA  | b2366 | FlhDC | CRP   | FNR   | FlhDC | Fur   | CpxR  | FlhDC |      |      |
| dsdC  | b2364 | LexA  | MetJ  | FlhDC | FlhDC | Rob   | CpxR  | FlhDC |      |      |
| ribA  | b1277 | SoxS  | DeoR  | LldR  | SoxS  | Fis   | FNR   | SoxS  |      |      |
| acnA  | b1276 | FruR  | ArcA  | IHF   | FruR  | NtrC  | Fis   | FruR  |      |      |
| cysB  | b1275 | CysB  | CpxR  | H-NS  | CysB  | FlhDC | FNR   | CysB  |      |      |
| topA  | b1274 | rpoH  | Fis   | FlhDC | rpoH  | SoxS  | Fis   | rpoH  | Fis  |      |
| ldcC  | b0186 | LsrR  | NtrC  | AppY  | Lrp   | NtrC  | OxyR  | NtrC  |      |      |
| accA  | b0185 | rpoH  | FlhDC | CpxR  | CpxR  | Fis   | Fur   | CpxR  |      |      |
| dnaE  | b0184 | FNR   | H-NS  | Fis   | CpxR  | Fis   | ArgR  | Fis   |      |      |
| rnhB  | b0183 | LexA  | FlhDC | H-NS  | Fis   | CpxR  | FlhDC | FlhDC |      |      |
| lpxA  | b0181 | GadE  | ArgR  | CpxR  | CpxR  | ArgR  | GadE  | GadE  | ArgR | CpxR |
| fabZ  | b0180 | GadE  | CpxR  | Fis   | CpxR  | ArgR  | FNR   | CpxR  |      |      |
| ugpQ  | b3449 | SoxS  | MarA  | PhoB  | PhoB  | CysB  | Nac   | PhoB  |      |      |
| yhhA  | b3448 | Fis   | FNR   | CRP   | CRP   | IHF   | FNR   | FNR   | CRP  |      |
| yfdN  | b2357 | AgaR  | RcsAB | MngR  | ArgR  | RcsAB | rpoH  | RcsAB |      |      |
| b2351 | b2351 | H-NS  | Fur   | IHF   | CRP   | rpoH  | IHF   | IHF   |      |      |
| yciV  | b1266 | Nac   | LexA  | PhoB  | HyfR  | PhoB  | FhlA  | PhoB  |      |      |
| trpE  | b1264 | TrpR  | IHF   | ArcA  | TrpR  | Lrp   | CpxR  | TrpR  |      |      |
| lpxD  | b0179 | GadE  | CpxR  | H-NS  | CpxR  | GadE  | Fis   | GadE  | CpxR |      |
| trpD  | b1263 | TrpR  | IHF   | ArcA  | TrpR  | Lrp   | CRP   | TrpR  |      |      |
| hlpA  | b0178 | CpxR  | GadE  | NarL  | CpxR  | GadE  | rpoH  | CpxR  | GadE |      |
| trpC  | b1262 | TrpR  | IHF   | TyrR  | TrpR  | Lrp   | IHF   | TrpR  | IHF  |      |
| yaeT  | b0177 | rpoH  | ArcA  | CRP   | H-NS  | CRP   | Fis   | CRP   |      |      |
| trpB  | b1261 | TrpR  | IHF   | TyrR  | TrpR  | Lrp   | CRP   | TrpR  |      |      |
| yaeL  | b0176 | rpoH  | Fis   | ArgR  | CpxR  | Fis   | H-NS  | Fis   |      |      |
| trpA  | b1260 | TrpR  | IHF   | CRP   | TrpR  | CRP   | Lrp   | TrpR  | CRP  |      |
| uppS  | b0174 | Fis   | CRP   | IHF   | Fis   | CRP   | H-NS  | Fis   | CRP  |      |
| dxr   | b0173 | Nac   | CpxR  | Lrp   | CpxR  | PurR  | TrpR  | CpxR  |      |      |
| fr    | b0172 | LexA  | FNR   | rpoH  | CpxR  | Fur   | FNR   | FNR   |      |      |
| pyrH  | b0171 | FNR   | Fis   | CRP   | ArgR  | IHF   | FNR   | FNR   |      |      |
| tsf   | b0170 | FNR   | Fis   | ArcA  | CRP   | FNR   | Fis   | FNR   | Fis  |      |
| yhhW  | b3439 | PhoP  | Cbl   | Fur   | CysB  | Cbl   | CpxR  | Cbl   |      |      |
| gntK  | b3437 | GntR  | TyrR  | IdnR  | GntR  | IdnR  | CRP   | GntR  | IdnR |      |
| asd   | b3433 | CRP   | IHF   | Lrp   | Lrp   | CRP   | FNR   | CRP   | Lrp  |      |
| glgB  | b3432 | FNR   | IHF   | CRP   | CRP   | FNR   | Lrp   | FNR   | CRP  |      |
| glgX  | b3431 | FNR   | ArcA  | IHF   | CRP   | FNR   | Lrp   | FNR   |      |      |
| yfdC  | b2347 | NtrC  | FlhDC | CaiF  | NtrC  | RcsAB | SoxS  | NtrC  |      |      |
| glgC  | b3430 | FNR   | CRP   | IHF   | CRP   | Lrp   | FNR   | FNR   | CRP  |      |
| vacJ  | b2346 | FruR  | GadX  | PhoP  | Lrp   | CpxR  | FruR  | FruR  |      |      |
| fadL  | b2344 | PhoP  | OmpR  | FadR  | FadR  | PhoP  | OmpR  | PhoP  | OmpR | FadR |
| yciG  | b1259 | H-NS  | FNR   | IHF   | H-NS  | CRP   | Lrp   | H-NS  |      |      |
| b2342 | b2342 | FadR  | ArcA  | CRP   | FadR  | DnaA  | FlhDC | FadR  |      |      |
| yciF  | b1258 | H-NS  | FNR   | Fis   | H-NS  | CRP   | FNR   | H-NS  | FNR  |      |
| b2341 | b2341 | FadR  | ArcA  | CRP   | FadR  | Fis   | ArcA  | FadR  | ArcA |      |
| b2340 | b2340 | CpxR  | NtrC  | H-NS  | CpxR  | Fur   | Lrp   | CpxR  |      |      |
| yciD  | b1256 | FNR   | Fur   | ArcA  | FNR   | CRP   | ArcA  | FNR   | ArcA |      |
| rpsB  | b0169 | FNR   | Fis   | ArcA  | FNR   | CRP   | Fis   | FNR   | Fis  |      |
| tonB  | b1252 | Fur   | FNR   | IHF   | Fur   | IHF   | CRP   | Fur   | IHF  |      |
| dapD  | b0166 | CpxR  | ArgR  | FNR   | CpxR  | CRP   | Lrp   | CpxR  |      |      |
| yaeG  | b0162 | CdaR  | CRP   | FNR   | CdaR  | FadR  | FlhDC | CdaR  |      |      |
| htrA  | b0161 | CpxR  | H-NS  | CRP   | CpxR  | H-NS  | Fur   | CpxR  | H-NS |      |
| dgt   | b0160 | Zur   | HcaR  | PhoB  | PhoB  | CysB  | NarL  | PhoB  |      |      |
| glgA  | b3429 | FNR   | IHF   | CRP   | CRP   | FNR   | Lrp   | FNR   | CRP  |      |
| yfcU  | b2338 | GntR  | FhlA  | PhoP  | NagC  | LexA  | GntR  | GntR  |      |      |
| cls   | b1249 | PhoB  | DnaA  | PhoP  | PhoP  | Lrp   | rpoH  | PhoP  |      |      |
| oppF  | b1247 | ModE  | Lrp   | ArcA  | ModE  | Lrp   | ArcA  | ModE  | Lrp  | ArcA |
| oppD  | b1246 | ModE  | Lrp   | ArcA  | ModE  | Lrp   | ArcA  | ModE  | Lrp  | ArcA |

|       |       |      |       |      |      |       |       |      |      |      |
|-------|-------|------|-------|------|------|-------|-------|------|------|------|
| oppC  | b1245 | ModE | Lrp   | ArcA | ModE | Lrp   | ArcA  | ModE | Lrp  | ArcA |
| oppB  | b1244 | ModE | Lrp   | ArcA | ModE | Lrp   | ArcA  | ModE | Lrp  | ArcA |
| oppA  | b1243 | ModE | Lrp   | ArcA | ModE | Lrp   | ArcA  | ModE | Lrp  | ArcA |
| adhE  | b1241 | FruR | NarL  | Fis  | FruR | NarL  | Fis   | FruR | NarL | Fis  |
| hemL  | b0154 | PhoP | CdaR  | Nac  | PhoP | ArgR  | Lrp   | PhoP |      |      |
| fhuB  | b0153 | Fur  | SoxS  | NagC | Fur  | OxyR  | FhlA  | Fur  |      |      |
| fhuD  | b0152 | Fur  | CpxR  | NarL | Fur  | FlhDC | CpxR  | Fur  | CpxR |      |
| fhuC  | b0151 | Cbl  | Fur   | FhlA | Fur  | Rob   | SoxS  | Fur  |      |      |
| fhuA  | b0150 | Fur  | FNR   | CRP  | Fur  | CRP   | FNR   | Fur  | FNR  | CRP  |
| malT  | b3418 | DgsA | Lrp   | CRP  | Lrp  | DgsA  | CRP   | DgsA | Lrp  | CRP  |
| malP  | b3417 | MalT | FNR   | CRP  | MalT | FNR   | CRP   | MalT | FNR  | CRP  |
| malQ  | b3416 | MalT | FNR   | FruR | MalT | FNR   | CRP   | MalT | FNR  |      |
| gntT  | b3415 | GntR | PhoB  | CRP  | GntR | FlhDC | CRP   | GntR | CRP  |      |
| yhgl  | b3414 | GntR | IscR  | CRP  | GntR | IscR  | CRP   | GntR | IscR | CRP  |
| fabB  | b2323 | FadR | CRP   | IHF  | FadR | FNR   | CpxR  | FadR |      |      |
| hns   | b1237 | GadX | H-NS  | Fis  | GadX | Fis   | H-NS  | GadX | H-NS | Fis  |
| galU  | b1236 | SoxS | CpxR  | ModE | CpxR | Fis   | FruR  | CpxR |      |      |
| sfsA  | b0146 | NarL | H-NS  | IHF  | H-NS | CRP   | FNR   | H-NS |      |      |
| dksA  | b0145 | HU   | Fis   | H-NS | FNR  | CRP   | Fis   | Fis  |      |      |
| pcnB  | b0143 | CRP  | FNR   | H-NS | rpoH | FNR   | IHF   | FNR  |      |      |
| feoB  | b3409 | Fur  | FNR   | NarL | Fur  | FNR   | CRP   | Fur  | FNR  |      |
| feoA  | b3408 | Fur  | FNR   | H-NS | Fur  | FNR   | CRP   | Fur  | FNR  |      |
| ompR  | b3405 | ArgR | UxuR  | Fur  | CpxR | ArgR  | NarL  | ArgR |      |      |
| pckA  | b3403 | FruR | IHF   | CRP  | FruR | CRP   | FNR   | FruR | CRP  |      |
| hslO  | b3401 | rpoH | CRP   | Fis  | rpoH | IHF   | LexA  | rpoH |      |      |
| hslR  | b3400 | rpoH | CRP   | Fis  | rpoH | IHF   | CRP   | rpoH | CRP  |      |
| accD  | b2316 | LexA | PhoP  | Fis  | LexA | Fur   | PurR  | LexA |      |      |
| cvpA  | b2313 | PurR | PhoP  | CRP  | PurR | FNR   | CRP   | PurR | CRP  |      |
| purF  | b2312 | PurR | PhoP  | CRP  | PurR | Lrp   | FNR   | PurR |      |      |
| b1228 | b1228 | FNR  | Fis   | PhoB | HyfR | Fis   | FhlA  | Fis  |      |      |
| narI  | b1227 | NarL | CpxR  | IHF  | NarL | IHF   | FNR   | NarL | IHF  |      |
| argT  | b2310 | NtrC | Fis   | IHF  | NtrC | Fis   | CRP   | NtrC | Fis  |      |
| narJ  | b1226 | NarL | IHF   | FNR  | NarL | IHF   | FNR   | NarL | IHF  | FNR  |
| narH  | b1225 | NarL | IHF   | FNR  | NarL | IHF   | FNR   | NarL | IHF  | FNR  |
| narG  | b1224 | NarL | IHF   | FNR  | NarL | IHF   | FNR   | NarL | IHF  | FNR  |
| narK  | b1223 | NarL | IHF   | FNR  | NarL | IHF   | FNR   | NarL | IHF  | FNR  |
| narX  | b1222 | ModE | UlaR  | CdaR | ModE | NarP  | NarL  | ModE |      |      |
| narL  | b1221 | ModE | Fis   | CRP  | ModE | FNR   | IHF   | ModE |      |      |
| panD  | b0131 | IHF  | Fis   | CRP  | CpxR | Lrp   | CRP   | CRP  |      |      |
| hisJ  | b2309 | NtrC | IHF   | ArgR | NtrC | CRP   | IHF   | NtrC | IHF  |      |
| hisQ  | b2308 | NtrC | NagC  | AscG | NtrC | IHF   | Lrp   | NtrC |      |      |
| hisM  | b2307 | NtrC | MetJ  | ArgR | NtrC | Lrp   | IHF   | NtrC |      |      |
| hisP  | b2306 | NtrC | LeuO  | MetJ | NtrC | ArgR  | PhoP  | NtrC |      |      |
| chaB  | b1217 | ModE | SoxS  | PhoB | CpxR | Fur   | PhoB  | PhoB |      |      |
| chaA  | b1216 | CpxR | NhaR  | Fis  | CRP  | rpoH  | CpxR  | CpxR |      |      |
| yfcE  | b2300 | Lrp  | SoxS  | Fis  | Fis  | FNR   | CRP   | Fis  |      |      |
| yadI  | b0129 | PhoB | CdaR  | CytR | CytR | FNR   | FlhDC | CytR |      |      |
| prfA  | b1211 | CpxR | RcsAB | ArcA | IHF  | ArcA  | FNR   | ArcA |      |      |
| hemA  | b1210 | FNR  | RcsAB | IHF  | IHF  | ArcA  | FNR   | FNR  | IHF  |      |
| speE  | b0121 | CRP  | FNR   | ArcA | Fis  | CRP   | IHF   | CRP  |      |      |
| speD  | b0120 | FNR  | CRP   | PurR | Fis  | CRP   | IHF   | CRP  |      |      |
| yacL  | b0119 | CRP  | Fur   | NarL | CRP  | CpxR  | rpoH  | CRP  |      |      |
| ychF  | b1203 | Fis  | FNR   | CRP  | Lrp  | Fis   | CRP   | Fis  | CRP  |      |
| acnB  | b0118 | FruR | Fis   | ArcA | FruR | Fis   | ArcA  | FruR | Fis  | ArcA |
| lpdA  | b0116 | PdhR | Fis   | FNR  | Fis  | ArcA  | FNR   | Fis  | FNR  |      |
| b1200 | b1200 | DhaR | IHF   | CRP  | DhaR | CRP   | FNR   | DhaR | CRP  |      |
| aceF  | b0115 | PdhR | ArcA  | FNR  | ArcA | FNR   | CRP   | ArcA | FNR  |      |
| aceE  | b0114 | PdhR | ArcA  | FNR  | ArcA | FNR   | CRP   | ArcA | FNR  |      |
| pdhR  | b0113 | PdhR | FNR   | CRP  | FNR  | Fis   | CRP   | FNR  | CRP  |      |

|        |       |      |       |      |      |       |      |       |      |      |
|--------|-------|------|-------|------|------|-------|------|-------|------|------|
| aroP   | b0112 | TyrR | CRP   | IHF  | TyrR | Lrp   | CRP  | TyrR  | CRP  |      |
| guaC   | b0104 | ArgR | IHF   | FNR  | CpxR | Fur   | ArgR | ArgR  |      |      |
| b2997  | b2997 | NarL | ArcA  | Fur  | NarL | ArcA  | FNR  | NarL  | ArcA |      |
| hybA   | b2996 | NarL | NarP  | TorR | NarL | ArcA  | FNR  | NarL  |      |      |
| hybB   | b2995 | NarL | CaiF  | LexA | NarL | ArcA  | CRP  | NarL  |      |      |
| hybC   | b2994 | NarL | FhIA  | NarP | NarL | ArcA  | FNR  | NarL  |      |      |
| hybG   | b2990 | NhaR | NarL  | Nac  | NarL | ArcA  | NarP | NarL  |      |      |
| araH_1 | b1899 | CsgD | CytR  | AraC | CRP  | AraC  | FNR  | AraC  |      |      |
| otsB   | b1897 | SoxS | Fis   | IHF  | H-NS | CRP   | IHF  | IHF   |      |      |
| glcC   | b2980 | GlcC | CRP   | IHF  | CRP  | ArcA  | GlcC | GlcC  | CRP  |      |
| otsA   | b1896 | MarA | SoxS  | H-NS | Lrp  | SoxS  | IHF  | SoxS  |      |      |
| flhD   | b1892 | LrhA | RcsAB | OmpR | QseB | RcsAB | Fur  | RcsAB |      |      |
| flhC   | b1891 | LrhA | RcsAB | OmpR | QseB | RcsAB | Fur  | RcsAB |      |      |
| motA   | b1890 | CpxR | FhDC  | H-NS | CpxR | FhDC  | GadE | CpxR  | FhDC |      |
| glcD   | b2979 | GlcC | ArcA  | IHF  | IHF  | ArcA  | CRP  | ArcA  | IHF  |      |
| glcF   | b2978 | ArcA | IHF   | CRP  | IHF  | ArcA  | Fis  | ArcA  | IHF  |      |
| glcG   | b2977 | GlcC | ArcA  | IHF  | IHF  | ArcA  | Lrp  | ArcA  | IHF  |      |
| glcB   | b2976 | GlcC | ArcA  | IHF  | IHF  | ArcA  | CRP  | ArcA  | IHF  |      |
| motB   | b1889 | CpxR | FhDC  | H-NS | CpxR | FhDC  | FNR  | CpxR  | FhDC |      |
| cheA   | b1888 | CpxR | H-NS  | GadE | CpxR | FNR   | FhDC | CpxR  |      |      |
| cheW   | b1887 | CpxR | H-NS  | FNR  | CpxR | FNR   | FhDC | CpxR  | FNR  |      |
| b2970  | b2970 | AlIR | rpoH  | NtrC | LexA | rpoH  | FadR | rpoH  |      |      |
| tar    | b1886 | CpxR | FNR   | FhDC | FhDC | FNR   | CpxR | CpxR  | FNR  | FhDC |
| tap    | b1885 | FNR  | FhDC  | CpxR | CpxR | FhDC  | FNR  | FNR   | FhDC | CpxR |
| cheR   | b1884 | FhDC | FNR   | CpxR | CpxR | FhDC  | FNR  | FhDC  | FNR  | CpxR |
| dinG   | b0799 | LexA | TyrR  | CpxR | LexA | CRP   | ArcA | LexA  |      |      |
| cheB   | b1883 | FNR  | FhDC  | CpxR | CpxR | FNR   | FhDC | FNR   | FhDC | CpxR |
| cheY   | b1882 | CpxR | FNR   | FhDC | CpxR | FNR   | FhDC | CpxR  | FNR  | FhDC |
| rhIE   | b0797 | FhDC | CRP   | Fis  | Fur  | Fis   | CRP  | CRP   | Fis  |      |
| cheZ   | b1881 | FNR  | FhDC  | CpxR | CpxR | FNR   | FhDC | FNR   | FhDC | CpxR |
| flhB   | b1880 | FhDC | FNR   | NarL | FhDC | CpxR  | H-NS | FhDC  |      |      |
| nupG   | b2964 | CytR | DeoR  | EvgA | CytR | CRP   | Fis  | CytR  |      |      |
| mltC   | b2963 | H-NS | Fur   | FruR | FruR | FhDC  | CpxR | FruR  |      |      |
| flhA   | b1879 | FhDC | IHF   | CRP  | FhDC | CpxR  | H-NS | FhDC  |      |      |
| flhE   | b1878 | FhDC | RcsAB | FNR  | FhDC | CpxR  | H-NS | FhDC  |      |      |
| mutY   | b2961 | MarA | PhoP  | LexA | LexA | CpxR  | ArgR | LexA  |      |      |
| yggH   | b2960 | FNR  | H-NS  | Fur  | Fis  | FNR   | CpxR | FNR   |      |      |
| ybhO   | b0789 | MarA | NarL  | PhoB | SoxS | MarA  | NtrC | MarA  |      |      |
| moaE   | b0785 | CueR | ModE  | PhoP | ModE | FNR   | NarL | ModE  |      |      |
| moaD   | b0784 | CueR | ModE  | HU   | ModE | FNR   | IHF  | ModE  |      |      |
| moaC   | b0783 | CueR | ModE  | CpxR | ModE | FNR   | IHF  | ModE  |      |      |
| moaB   | b0782 | CueR | ModE  | PhoP | ModE | FNR   | CueR | CueR  | ModE |      |
| moaA   | b0781 | CueR | ModE  | EnvY | ModE | FNR   | IHF  | ModE  |      |      |
| ybhK   | b0780 | ArcA | H-NS  | LexA | PhoB | Rob   | LexA | LexA  |      |      |
| yggN   | b2958 | FhDC | CpxR  | FruR | SoxS | CpxR  | NagC | CpxR  |      |      |
| yggT   | b2952 | rpoH | PhoB  | AraC | FhDC | CpxR  | rpoH | rpoH  |      |      |
| aspS   | b1866 | FNR  | Fis   | CRP  | PurR | Fis   | FNR  | FNR   | Fis  |      |
| yebC   | b1864 | ArgR | NarL  | Fis  | Fis  | CRP   | PurR | Fis   |      |      |
| uvrB   | b0779 | LexA | ArcA  | IHF  | LexA | CRP   | ArcA | LexA  | ArcA |      |
| ruvA   | b1861 | LexA | CpxR  | SoxS | LexA | CRP   | FNR  | LexA  |      |      |
| ruvB   | b1860 | LexA | GcvA  | NagC | LexA | FhIA  | CdaR | LexA  |      |      |
| bioB   | b0775 | CRP  | BirA  | CpxR | IHF  | CRP   | FNR  | CRP   |      |      |
| gshB   | b2947 | HU   | CpxR  | NarL | SoxS | CpxR  | Lrp  | CpxR  |      |      |
| galP   | b2943 | GalR | GalS  | CRP  | GalR | GalS  | CRP  | GalR  | GalS | CRP  |
| metK   | b2942 | MetJ | CRP   | FNR  | MetJ | CRP   | FNR  | MetJ  | CRP  | FNR  |
| yebL   | b1857 | Zur  | HcaR  | TyrR | Zur  | CRP   | FNR  | Zur   |      |      |
| pykA   | b1854 | NarL | Fur   | rpoH | IHF  | NarL  | FNR  | NarL  |      |      |
| zwf    | b1852 | Rob  | MarA  | SoxS | Rob  | SoxS  | MarA | Rob   | MarA | SoxS |
| ybhE   | b0767 | OxyR | IHF   | FNR  | H-NS | SoxS  | IHF  | IHF   |      |      |



|       |       |      |       |       |       |       |       |       |      |      |  |
|-------|-------|------|-------|-------|-------|-------|-------|-------|------|------|--|
| edd   | b1851 | GntR | FruR  | NarP  | GntR  | FruR  | PhoB  | GntR  | FruR |      |  |
| ybhA  | b0766 | HU   | H-NS  | PhoB  | Fur   | H-NS  | CRP   | H-NS  |      |      |  |
| eda   | b1850 | GntR | QseB  | DgsA  | GntR  | PhoB  | FruR  | GntR  |      |      |  |
| modC  | b0765 | ModE | CRP   | FhlA  | ModE  | FlhDC | CpxR  | ModE  |      |      |  |
| modB  | b0764 | ModE | GntR  | MprA  | ModE  | CRP   | H-NS  | ModE  |      |      |  |
| modA  | b0763 | ModE | CRP   | IHF   | ModE  | CRP   | IHF   | ModE  | CRP  | IHF  |  |
| modF  | b0760 | Fur  | CpxR  | NtrC  | Fur   | CRP   | H-NS  | Fur   |      |      |  |
| speA  | b2938 | PurR | H-NS  | CRP   | PurR  | Fis   | FNR   | PurR  |      |      |  |
| speB  | b2937 | PurR | CpxR  | Fis   | PurR  | CpxR  | FNR   | PurR  | CpxR |      |  |
| purT  | b1849 | CRP  | FNR   | IHF   | PurR  | CRP   | Lrp   | CRP   |      |      |  |
| yebG  | b1848 | CpxR | LexA  | H-NS  | LexA  | CRP   | ArcA  | LexA  |      |      |  |
| yebF  | b1847 | CpxR | LexA  | H-NS  | LexA  | ArcA  | CRP   | LexA  |      |      |  |
| yebE  | b1846 | CpxR | IHF   | Fur   | CpxR  | CRP   | ArcA  | CpxR  |      |      |  |
| ptrB  | b1845 | NagC | BaeR  | ExuR  | CpxR  | NagC  | FlhDC | NagC  |      |      |  |
| galE  | b0759 | HU   | GalR  | GalS  | HU    | GalR  | GalS  | HU    | GalR | GalS |  |
| galT  | b0758 | HU   | GalR  | GalS  | HU    | GalR  | GalS  | HU    | GalR | GalS |  |
| holE  | b1842 | Fis  | H-NS  | rpoH  | CRP   | LexA  | H-NS  | H-NS  |      |      |  |
| galK  | b0757 | HU   | GalR  | GalS  | HU    | GalR  | GalS  | HU    | GalR | GalS |  |
| b1841 | b1841 | H-NS | PhoB  | Fis   | Fis   | NarL  | Fur   | Fis   |      |      |  |
| galM  | b0756 | HU   | GalR  | GalS  | HU    | GalR  | GalS  | HU    | GalR | GalS |  |
| b1840 | b1840 | H-NS | PhoB  | CRP   | Fis   | IHF   | CRP   | CRP   |      |      |  |
| gpmA  | b0755 | Fur  | PhoP  | GadE  | Fur   | CRP   | FNR   | Fur   |      |      |  |
| aroG  | b0754 | TyrR | CpxR  | Nac   | TyrR  | CpxR  | CRP   | TyrR  | CpxR |      |  |
| b0753 | b0753 | OmpR | MarA  | NtrC  | ArcA  | NtrC  | IHF   | NtrC  |      |      |  |
| nadA  | b0750 | CRP  | ArcA  | IHF   | CRP   | IHF   | FNR   | CRP   | IHF  |      |  |
| epd   | b2927 | FruR | NarL  | Fis   | FruR  | CRP   | rpoH  | FruR  |      |      |  |
| pgk   | b2926 | FruR | NarL  | CRP   | FruR  | CRP   | Fis   | FruR  | CRP  |      |  |
| fba   | b2925 | FruR | CRP   | FNR   | FruR  | rpoH  | Fis   | FruR  |      |      |  |
| yggB  | b2924 | CRP  | FNR   | H-NS  | CRP   | FNR   | IHF   | CRP   | FNR  |      |  |
| yggE  | b2922 | IHF  | FNR   | CRP   | FNR   | CRP   | IHF   | IHF   | FNR  | CRP  |  |
| pphA  | b1838 | rpoH | OxyR  | PhoP  | UxuR  | rpoH  | ArgR  | rpoH  |      |      |  |
| ygfH  | b2920 | NagC | SoxS  | GntR  | RcsAB | FadR  | NagC  | NagC  |      |      |  |
| b1836 | b1836 | H-NS | IHF   | FNR   | IHF   | H-NS  | CRP   | H-NS  | IHF  |      |  |
| yebU  | b1835 | Fis  | GadE  | PurR  | SoxS  | PurR  | MarA  | PurR  |      |      |  |
| prc   | b1830 | Fis  | rpoH  | CRP   | Fis   | IHF   | CRP   | Fis   | CRP  |      |  |
| ybgF  | b0742 | Fis  | CpxR  | Lrp   | FNR   | CpxR  | CRP   | CpxR  |      |      |  |
| ygfG  | b2919 | YiaJ | EvgA  | AllR  | AgaR  | EvgA  | PhoB  | EvgA  |      |      |  |
| iciA  | b2916 | PhoB | FlhDC | TyrR  | PhoB  | FhlA  | ArgR  | PhoB  |      |      |  |
| rpiA  | b2914 | FadR | MetR  | rpoH  | SoxS  | rpoH  | CpxR  | rpoH  |      |      |  |
| serA  | b2913 | Nac  | Lrp   | CRP   | Nac   | Lrp   | CRP   | Nac   | Lrp  | CRP  |  |
| htpX  | b1829 | rpoH | IHF   | FNR   | rpoH  | CRP   | IHF   | rpoH  | IHF  |      |  |
| ygfA  | b2912 | H-NS | CpxR  | rpoH  | CpxR  | PhoB  | FadR  | CpxR  |      |      |  |
| b1825 | b1825 | NarL | IHF   | FNR   | Fis   | FNR   | CRP   | FNR   |      |      |  |
| cspC  | b1823 | CpxR | FNR   | PhoB  | CRP   | Fis   | FNR   | FNR   |      |      |  |
| tolR  | b0738 | PhoP | ArgR  | FlhDC | FlhDC | Fis   | Fur   | FlhDC |      |      |  |
| b1821 | b1821 | rpoH | MalT  | H-NS  | CsgD  | FruR  | rpoH  | rpoH  |      |      |  |
| ybgC  | b0736 | H-NS | Fis   | NtrC  | CRP   | H-NS  | CpxR  | H-NS  |      |      |  |
| ybgE  | b0735 | FruR | H-NS  | FNR   | FruR  | ArcA  | FNR   | FruR  | FNR  |      |  |
| cydB  | b0734 | FruR | H-NS  | ArcA  | FruR  | H-NS  | ArcA  | FruR  | H-NS | ArcA |  |
| cydA  | b0733 | FruR | H-NS  | ArcA  | FruR  | H-NS  | ArcA  | FruR  | H-NS | ArcA |  |
| pepP  | b2908 | CpxR | LexA  | NarL  | CpxR  | rpoH  | PurR  | CpxR  |      |      |  |
| gcvT  | b2905 | PurR | GcvA  | Lrp   | PurR  | Lrp   | GcvA  | PurR  | GcvA | Lrp  |  |
| gcvH  | b2904 | PurR | GcvA  | Lrp   | Lrp   | PurR  | GcvA  | PurR  | GcvA | Lrp  |  |
| gcvP  | b2903 | GcvA | PurR  | Lrp   | PurR  | Lrp   | FNR   | PurR  | Lrp  |      |  |
| manZ  | b1819 | NagC | DgsA  | CRP   | NagC  | DgsA  | CRP   | NagC  | DgsA | CRP  |  |
| manY  | b1818 | NagC | DgsA  | CRP   | NagC  | DgsA  | CRP   | NagC  | DgsA | CRP  |  |
| manX  | b1817 | NagC | DgsA  | CRP   | NagC  | DgsA  | CRP   | NagC  | DgsA | CRP  |  |
| sdaA  | b1814 | Lrp  | IHF   | CRP   | Lrp   | rpoH  | CRP   | Lrp   | CRP  |      |  |
| sucD  | b0729 | Fur  | ArcA  | IHF   | Fur   | ArcA  | IHF   | Fur   | ArcA | IHF  |  |

|       |       |       |      |       |       |       |       |       |       |      |
|-------|-------|-------|------|-------|-------|-------|-------|-------|-------|------|
| sucC  | b0728 | Fur   | ArcA | IHF   | Fur   | ArcA  | IHF   | Fur   | ArcA  | IHF  |
| sucB  | b0727 | Fur   | ArcA | IHF   | Fur   | ArcA  | IHF   | Fur   | ArcA  | IHF  |
| sucA  | b0726 | Fur   | ArcA | IHF   | Fur   | ArcA  | IHF   | Fur   | ArcA  | IHF  |
| b1810 | b1810 | H-NS  | NtrC | Fis   | H-NS  | CRP   | IHF   | H-NS  |       |      |
| sdhB  | b0724 | Fur   | FNR  | FlhDC | Fur   | ArcA  | FNR   | Fur   | FNR   |      |
| sdhA  | b0723 | Fur   | ArcA | FNR   | Fur   | ArcA  | FNR   | Fur   | ArcA  | FNR  |
| sdhD  | b0722 | Fur   | ArcA | CRP   | Fur   | ArcA  | FNR   | Fur   | ArcA  |      |
| gltA  | b0720 | ArcA  | IHF  | CRP   | ArcA  | IHF   | CRP   | ArcA  | IHF   | CRP  |
| b1809 | b1809 | PhoP  | Fur  | CRP   | Fis   | CRP   | H-NS  | CRP   |       |      |
| fadD  | b1805 | FadR  | ArcA | CRP   | FadR  | ArcA  | CRP   | FadR  | ArcA  | CRP  |
| ybgQ  | b0718 | NagC  | CpxR | RcsAB | RcsAB | NagC  | LexA  | NagC  | RcsAB |      |
| yeaW  | b1802 | GntR  | NagC | CusR  | UxuR  | NagC  | SoxS  | NagC  |       |      |
| ybgO  | b0716 | CdaR  | Fur  | LexA  | rpoH  | FlhDC | Fur   | Fur   |       |      |
| abrB  | b0715 | CpxR  | MetR | FlhDC | NarL  | FlhDC | Fur   | FlhDC |       |      |
| b0703 | b0703 | Rob   | rpoH | CpxR  | PhoB  | NagC  | CpxR  | CpxR  |       |      |
| yrfG  | b3399 | rpoH  | GadX | CpxR  | rpoH  | Fis   | IHF   | rpoH  |       |      |
| aroB  | b3389 | Fis   | FNR  | LexA  | Fis   | CpxR  | FlhDC | Fis   |       |      |
| b2299 | b2299 | FNR   | Lrp  | IHF   | Fis   | IHF   | CpxR  | IHF   |       |      |
| pta   | b2297 | FNR   | ArcA | CRP   | FNR   | ArcA  | CRP   | FNR   | ArcA  | CRP  |
| ackA  | b2296 | FruR  | ArcA | FNR   | ArcA  | FNR   | CRP   | ArcA  | FNR   |      |
| b2295 | b2295 | FruR  | IHF  | rpoH  | CpxR  | rpoH  | FNR   | rpoH  |       |      |
| nuoA  | b2288 | NarL  | Fis  | IHF   | NarL  | Fis   | ArcA  | NarL  | Fis   |      |
| nuoB  | b2287 | NarL  | Fis  | FNR   | NarL  | Fis   | IHF   | NarL  | Fis   |      |
| nuoC  | b2286 | NarL  | Fis  | ArcA  | NarL  | Fis   | IHF   | NarL  | Fis   |      |
| nuoE  | b2285 | NarL  | Fis  | ArcA  | NarL  | Fis   | IHF   | NarL  | Fis   |      |
| nuoF  | b2284 | NarL  | Fis  | ArcA  | NarL  | Fis   | IHF   | NarL  | Fis   |      |
| b1199 | b1199 | DhaR  | Fis  | NarL  | DhaR  | CRP   | FNR   | DhaR  |       |      |
| nuoG  | b2283 | NarL  | Fis  | IHF   | NarL  | Fis   | IHF   | NarL  | Fis   | IHF  |
| ycgC  | b1198 | DhaR  | Fis  | CRP   | DhaR  | CRP   | FNR   | DhaR  | CRP   |      |
| nuoH  | b2282 | NarL  | Fis  | ArcA  | NarL  | Fis   | IHF   | NarL  | Fis   |      |
| treA  | b1197 | NtrC  | Fis  | FNR   | NtrC  | Nac   | PhoB  | NtrC  |       |      |
| nuoI  | b2281 | NarL  | Fis  | FNR   | NarL  | Fis   | IHF   | NarL  | Fis   |      |
| nuoJ  | b2280 | NarL  | Fis  | FNR   | NarL  | Fis   | IHF   | NarL  | Fis   |      |
| ycgR  | b1194 | FlhDC | CpxR | H-NS  | FlhDC | CpxR  | FNR   | FlhDC | CpxR  |      |
| dadX  | b1190 | Lrp   | CRP  | FNR   | Lrp   | CRP   | FNR   | Lrp   | CRP   | FNR  |
| cysG  | b3368 | NarP  | FruR | NarL  | NarP  | FruR  | NarL  | NarP  | FruR  | NarL |
| nirC  | b3367 | Lacl  | NarP | UxuR  | NarP  | NarL  | FruR  | NarP  |       |      |
| nirD  | b3366 | AlIR  | Cbl  | NarP  | NarP  | NarL  | FruR  | NarP  |       |      |
| nirB  | b3365 | NarP  | NarL | FruR  | NarP  | FruR  | NarL  | NarP  | NarL  | FruR |
| yhfC  | b3364 | CRP   | Fis  | H-NS  | CRP   | FNR   | Fis   | CRP   | Fis   |      |
| ppiA  | b3363 | CytR  | CpxR | NagC  | CpxR  | CytR  | Fis   | CytR  | CpxR  |      |
| nuoK  | b2279 | NarL  | Fis  | FNR   | NarL  | Fis   | ArcA  | NarL  | Fis   |      |
| nuoL  | b2278 | NarL  | Fis  | ArcA  | NarL  | Fis   | ArcA  | NarL  | Fis   | ArcA |
| fic   | b3361 | NtrC  | Fis  | H-NS  | NtrC  | Fis   | CRP   | NtrC  | Fis   |      |
| nuoM  | b2277 | NarL  | Fis  | ArcA  | NarL  | Fis   | IHF   | NarL  | Fis   |      |
| nuoN  | b2276 | NarL  | Fis  | IHF   | NarL  | Fis   | IHF   | NarL  | Fis   | IHF  |
| dadA  | b1189 | Lrp   | CRP  | IHF   | Lrp   | CRP   | ArcA  | Lrp   | CRP   |      |
| ycgB  | b1188 | FNR   | NtrC | IHF   | NtrC  | Fis   | CRP   | NtrC  |       |      |
| fadR  | b1187 | BaeR  | PhoB | FlhDC | NagC  | SoxS  | FlhDC | FlhDC |       |      |
| yfbL  | b2271 | AgaR  | FucR | CsgD  | AgaR  | NagC  | RcsAB | AgaR  |       |      |
| dsbB  | b1185 | LexA  | CpxR | Fur   | Fis   | Lrp   | CpxR  | CpxR  |       |      |
| umuC  | b1184 | LexA  | CpxR | CRP   | LexA  | CRP   | ArcA  | LexA  | CRP   |      |
| umuD  | b1183 | LexA  | CpxR | H-NS  | LexA  | CRP   | ArcA  | LexA  |       |      |
| secA  | b0098 | ModE  | PdhR | NarL  | CpxR  | FNR   | NarL  | NarL  |       |      |
| ycgN  | b1181 | PhoP  | CpxR | RcsAB | SoxS  | PhoP  | Lrp   | PhoP  |       |      |
| lpxC  | b0096 | rpoH  | CpxR | FlhDC | CRP   | FNR   | CpxR  | CpxR  |       |      |
| ftsZ  | b0095 | RcsAB | GntR | OxyR  | RcsAB | CpxR  | Lrp   | RcsAB |       |      |
| ftsA  | b0094 | RcsAB | Fis  | H-NS  | RcsAB | CpxR  | FNR   | RcsAB |       |      |
| ftsQ  | b0093 | RcsAB | Fis  | rpoH  | RcsAB | rpoH  | CpxR  | RcsAB | rpoH  |      |

|       |       |       |       |       |       |       |       |       |      |      |
|-------|-------|-------|-------|-------|-------|-------|-------|-------|------|------|
| ddlB  | b0092 | RcsAB | Fis   | rpoH  | RcsAB | CpxR  | ArgR  | RcsAB |      |      |
| murC  | b0091 | Fur   | Fis   | FNR   | FlhDC | ArgR  | Fur   | Fur   |      |      |
| argD  | b3359 | PhoP  | ArgR  | CRP   | ArgR  | PhoP  | Lrp   | PhoP  | ArgR |      |
| crp   | b3357 | FruR  | CRP   | PdhR  | CRP   | Lrp   | IHF   | CRP   |      |      |
| minC  | b1176 | H-NS  | Fis   | CpxR  | H-NS  | CRP   | Lrp   | H-NS  |      |      |
| b1170 | b1170 | CpxR  | rpoH  | NanR  | CpxR  | PhoB  | PhoP  | CpxR  |      |      |
| murE  | b0085 | ModE  | GadE  | FlhDC | CpxR  | rpoH  | FlhDC | FlhDC |      |      |
| ftsI  | b0084 | CpxR  | IclR  | FlhDC | SoxS  | FlhDC | Fis   | FlhDC |      |      |
| yabB  | b0081 | H-NS  | GadE  | Fis   | CpxR  | rpoH  | Fis   | Fis   |      |      |
| fkpA  | b3347 | LexA  | CpxR  | FlhDC | CpxR  | Fis   | FNR   | CpxR  |      |      |
| yheN  | b3345 | ModE  | CpxR  | LexA  | CpxR  | Lrp   | rpoH  | CpxR  |      |      |
| yheL  | b3343 | rpoH  | LexA  | CpxR  | rpoH  | IHF   | CRP   | rpoH  |      |      |
| rpsL  | b3342 | FNR   | ArcA  | Fis   | FNR   | Fis   | CpxR  | FNR   | Fis  |      |
| b2258 | b2258 | PhoB  | H-NS  | CpxR  | FlhDC | CpxR  | LexA  | CpxR  |      |      |
| rpsG  | b3341 | FNR   | Fis   | ArcA  | FNR   | Fis   | ArcA  | FNR   | Fis  | ArcA |
| b2257 | b2257 | NarL  | Fur   | FlhDC | FlhDC | rpoH  | CpxR  | FlhDC |      |      |
| fusA  | b3340 | ArcA  | Fis   | FNR   | FNR   | Fis   | ArcA  | ArcA  | Fis  | FNR  |
| b1169 | b1169 | Fis   | FNR   | CRP   | CpxR  | CRP   | FNR   | FNR   | CRP  |      |
| b1168 | b1168 | CpxR  | FNR   | Fis   | CpxR  | rpoH  | Fis   | CpxR  | Fis  |      |
| ymgA  | b1165 | CpxR  | FNR   | IHF   | CRP   | IHF   | Lrp   | IHF   |      |      |
| ycgZ  | b1164 | CpxR  | FNR   | IHF   | IHF   | CRP   | Fis   | IHF   |      |      |
| b1163 | b1163 | CRP   | IHF   | Fis   | CpxR  | FNR   | CRP   | CRP   |      |      |
| ilvH  | b0078 | Lrp   | OmpR  | H-NS  | Lrp   | H-NS  | PurR  | Lrp   | H-NS |      |
| ilvI  | b0077 | Lrp   | ArgR  | GadE  | Lrp   | H-NS  | CRP   | Lrp   |      |      |
| leuA  | b0074 | LeuO  | Lrp   | CRP   | Lrp   | CRP   | IHF   | Lrp   | CRP  |      |
| leuB  | b0073 | LeuO  | Lrp   | CRP   | CRP   | Lrp   | IHF   | Lrp   | CRP  |      |
| leuC  | b0072 | LeuO  | Lrp   | CRP   | Lrp   | CRP   | IHF   | Lrp   | CRP  |      |
| leuD  | b0071 | LeuO  | Lrp   | CRP   | Lrp   | CRP   | IHF   | Lrp   | CRP  |      |
| tufA  | b3339 | Fis   | ArcA  | FNR   | Fis   | FNR   | ArcA  | Fis   | ArcA | FNR  |
| bfr   | b3336 | Fur   | Ada   | FNR   | CRP   | ArcA  | FNR   | FNR   |      |      |
| yheJ  | b3332 | Rob   | SoxS  | GntR  | RcsAB | YiaJ  | GntR  | GntR  |      |      |
| b2248 | b2248 | PhoP  | NarL  | FlhDC | RcsAB | rpoH  | FlhDC | FlhDC |      |      |
| b2247 | b2247 | RcsAB | GalR  | GalS  | NagC  | RcsAB | Rob   | RcsAB |      |      |
| b2246 | b2246 | AllR  | RcsAB | ModE  | UxuR  | RcsAB | MarA  | RcsAB |      |      |
| yfaD  | b2244 | CsgD  | RcsAB | GadX  | RcsAB | rpoH  | FlhDC | RcsAB |      |      |
| glpC  | b2243 | FlhDC | FNR   | ArcA  | FlhDC | ArcA  | FNR   | FlhDC | FNR  | ArcA |
| glpB  | b2242 | FlhDC | CRP   | ArcA  | FlhDC | ArcA  | FNR   | FlhDC | ArcA |      |
| glpA  | b2241 | FlhDC | FNR   | ArcA  | FlhDC | ArcA  | FNR   | FlhDC | FNR  | ArcA |
| glpT  | b2240 | CRP   | ArcA  | GlpR  | IHF   | CRP   | FNR   | CRP   |      |      |
| yabK  | b0067 | FhlA  | AllR  | NarP  | NtrC  | NarP  | NarL  | NarP  |      |      |
| araC  | b0064 | AraC  | DcuR  | NarL  | AraC  | CRP   | FNR   | AraC  |      |      |
| araB  | b0063 | AraC  | CaiF  | MngR  | AraC  | CRP   | H-NS  | AraC  |      |      |
| araD  | b0061 | MngR  | AraC  | NhaR  | CRP   | AraC  | H-NS  | AraC  |      |      |
| polB  | b0060 | LexA  | FlhDC | IHF   | LexA  | CRP   | ArcA  | LexA  |      |      |
| glpQ  | b2239 | GlpR  | CRP   | FNR   | IHF   | CRP   | FNR   | CRP   | FNR  |      |
| rpsJ  | b3321 | ArcA  | FNR   | Fis   | FNR   | ArcA  | Fis   | ArcA  | FNR  | Fis  |
| inaA  | b2237 | Rob   | MarA  | BetI  | Rob   | SoxS  | MarA  | Rob   | MarA |      |
| rplC  | b3320 | ArcA  | FNR   | Fis   | ArcA  | FNR   | Fis   | ArcA  | FNR  | Fis  |
| yfaE  | b2236 | ArgP  | AraC  | DnaA  | DnaA  | Fis   | CRP   | DnaA  |      |      |
| nrdB  | b2235 | DnaA  | Fis   | CRP   | Fis   | DnaA  | CRP   | DnaA  | Fis  | CRP  |
| nrdA  | b2234 | DnaA  | Fis   | ArgP  | Fis   | DnaA  | CRP   | DnaA  | Fis  |      |
| gyrA  | b2231 | Fis   | CRP   | Lrp   | Fis   | CRP   | PurR  | Fis   | CRP  |      |
| yabO  | b0058 | OmpR  | PurR  | rpoH  | PurR  | IHF   | CRP   | PurR  |      |      |
| surA  | b0053 | NarL  | Fis   | IHF   | Fis   | H-NS  | CRP   | Fis   |      |      |
| pdxA  | b0052 | Fis   | FlhDC | NarL  | Fis   | H-NS  | PhoP  | Fis   |      |      |
| ksgA  | b0051 | LexA  | Fis   | ModE  | Fis   | NagC  | rpoH  | Fis   |      |      |
| rplD  | b3319 | FNR   | ArcA  | Fis   | ArcA  | FNR   | Fis   | FNR   | ArcA | Fis  |
| yjjY  | b4402 | FruR  | FNR   | CRP   | CpxR  | H-NS  | FNR   | FNR   |      |      |
| rplW  | b3318 | ArcA  | FNR   | Fis   | ArcA  | FNR   | Fis   | ArcA  | FNR  | Fis  |

|        |       |      |      |       |       |      |       |       |      |      |
|--------|-------|------|------|-------|-------|------|-------|-------|------|------|
| arcA   | b4401 | FNR  | CRP  | IHF   | FNR   | ArcA | CRP   | FNR   | CRP  |      |
| rplB   | b3317 | FNR  | ArcA | Fis   | ArcA  | FNR  | Fis   | FNR   | ArcA | Fis  |
| rpsS   | b3316 | ArcA | FNR  | Fis   | ArcA  | FNR  | Fis   | ArcA  | FNR  | Fis  |
| rplV   | b3315 | ArcA | FNR  | Fis   | ArcA  | FNR  | Fis   | ArcA  | FNR  | Fis  |
| rpsC   | b3314 | ArcA | FNR  | Fis   | FNR   | ArcA | Fis   | ArcA  | FNR  | Fis  |
| rplP   | b3313 | ArcA | FNR  | Fis   | FNR   | ArcA | Fis   | ArcA  | FNR  | Fis  |
| b2228  | b2228 | FruR | NarL | GntR  | NagC  | GntR | TrpR  | GntR  |      |      |
| rplN   | b3310 | FNR  | ArcA | Fis   | FNR   | ArcA | Fis   | FNR   | ArcA | Fis  |
| lit    | b1139 | MalT | CaiF | CpxR  | CRP   | CpxR | rpoH  | CpxR  |      |      |
| icdA   | b1136 | FruR | ArcA | CRP   | FruR  | ArcA | CRP   | FruR  | ArcA | CRP  |
| b1134  | b1134 | PurR | CpxR | rpoH  | LexA  | PurR | NagC  | PurR  |      |      |
| ycfC   | b1132 | PurR | DgsA | CRP   | PurR  | FNR  | Fis   | PurR  |      |      |
| purB   | b1131 | PurR | CRP  | FNR   | PurR  | Fis  | CRP   | PurR  | CRP  |      |
| phoP   | b1130 | PhoP | PhoB | FNR   | PhoP  | FNR  | CRP   | PhoP  | FNR  |      |
| fixC   | b0043 | CaiF | NarP | AllR  | AllR  | NtrC | NagC  | AllR  |      |      |
| rplE   | b3308 | FNR  | ArcA | Fis   | FNR   | ArcA | Fis   | FNR   | ArcA | Fis  |
| rpsN   | b3307 | FNR  | ArcA | Fis   | FNR   | ArcA | Fis   | FNR   | ArcA | Fis  |
| rpsH   | b3306 | FNR  | ArcA | Fis   | FNR   | ArcA | Fis   | FNR   | ArcA | Fis  |
| rplF   | b3305 | FNR  | ArcA | Fis   | FNR   | ArcA | Fis   | FNR   | ArcA | Fis  |
| rplR   | b3304 | ArcA | FNR  | Fis   | FNR   | ArcA | Fis   | ArcA  | FNR  | Fis  |
| rpsE   | b3303 | FNR  | ArcA | Fis   | FNR   | ArcA | Fis   | FNR   | ArcA | Fis  |
| rpmD   | b3302 | Fis  | FNR  | ArcA  | FNR   | ArcA | Fis   | Fis   | FNR  | ArcA |
| rcsC   | b2218 | PhoB | PhoP | H-NS  | PhoP  | PurR | PhoB  | PhoB  | PhoP |      |
| rplO   | b3301 | FNR  | ArcA | Fis   | FNR   | ArcA | Fis   | FNR   | ArcA | Fis  |
| prlA   | b3300 | FNR  | ArcA | Fis   | FNR   | ArcA | CRP   | FNR   | ArcA |      |
| yojN   | b2216 | CpxR | H-NS | FlhDC | IHF   | CRP  | FlhDC | FlhDC |      |      |
| ompC   | b2215 | OmpR | Lrp  | EnvY  | Lrp   | CpxR | OmpR  | OmpR  | Lrp  |      |
| phoQ   | b1129 | PhoP | FruR | MtlR  | PhoP  | Fis  | PhoB  | PhoP  |      |      |
| ada    | b2213 | Ada  | UidR | UxuR  | RcsAB | ArgR | UxuR  | UxuR  |      |      |
| mqa    | b2211 | Fur  | IHF  | CRP   | Fur   | FNR  | Fis   | Fur   |      |      |
| potA   | b1126 | Fis  | CRP  | IHF   | Fis   | CRP  | FNR   | Fis   | CRP  |      |
| yojH   | b2210 | CRP  | FNR  | Lrp   | ArcA  | CRP  | IHF   | CRP   |      |      |
| potB   | b1125 | Fis  | CRP  | IHF   | CRP   | FNR  | Fis   | Fis   | CRP  |      |
| potC   | b1124 | Fis  | CRP  | IHF   | FNR   | CRP  | Fis   | Fis   | CRP  |      |
| potD   | b1123 | FNR  | CRP  | Fis   | CRP   | ArcA | Fis   | CRP   | Fis  |      |
| caiB   | b0038 | CaiF | Rob  | HU    | AllR  | NtrC | CaiF  | CaiF  |      |      |
| caiF   | b0034 | NarL | H-NS | LexA  | NarL  | H-NS | FNR   | NarL  | H-NS |      |
| carB   | b0033 | ArgR | PurR | IHF   | ArgR  | PurR | IHF   | ArgR  | PurR | IHF  |
| carA   | b0032 | ArgR | PurR | IHF   | ArgR  | PurR | IHF   | ArgR  | PurR | IHF  |
| eco    | b2209 | Lrp  | CRP  | FNR   | Lrp   | CRP  | FNR   | Lrp   | CRP  | FNR  |
| napF   | b2208 | GntR | NarP | IscR  | NarP  | ModE | NarL  | NarP  |      |      |
| napD   | b2207 | NarP | IscR | ModE  | NarP  | NarL | ModE  | NarP  | ModE |      |
| napA   | b2206 | IscR | NarP | ModE  | NarP  | NarL | FlhDC | NarP  |      |      |
| napG   | b2205 | NarP | IscR | ModE  | NarP  | NarL | ModE  | NarP  | ModE |      |
| napH   | b2204 | MtlR | MngR | NarP  | NarP  | ModE | NarL  | NarP  |      |      |
| napB   | b2203 | NarP | IscR | ModE  | NarP  | NarL | ModE  | NarP  | ModE |      |
| ycfW   | b1118 | Rob  | SoxS | MarA  | SoxS  | NarL | PhoP  | SoxS  |      |      |
| napC   | b2202 | Cbl  | AscG | NarP  | NarP  | NarL | FlhDC | NarP  |      |      |
| ycfS   | b1113 | CpxR | BaeR | Fur   | CpxR  | CRP  | rpoH  | CpxR  |      |      |
| ycfR   | b1112 | IHF  | CRP  | FNR   | CRP   | IHF  | FNR   | IHF   | CRP  | FNR  |
| ribF   | b0025 | ArgR | CpxR | GadE  | FlhDC | ArgR | H-NS  | ArgR  |      |      |
| rpsT   | b0023 | Fis  | FNR  | IHF   | CRP   | Fis  | FNR   | Fis   | FNR  |      |
| insA_1 | b0022 | CpxR | H-NS | Fis   | CRP   | IHF  | Fis   | Fis   |      |      |
| ndh    | b1109 | ArcA | Fis  | IHF   | Fis   | ArcA | FNR   | ArcA  | Fis  |      |
| ycfO   | b1107 | PhoB | CpxR | NarL  | rpoH  | CpxR | TyrR  | CpxR  |      |      |
| nhaA   | b0019 | NhaR | H-NS | IHF   | H-NS  | Fis  | FNR   | H-NS  |      |      |
| fhuE   | b1102 | Fur  | CRP  | IHF   | Fur   | CRP  | IHF   | Fur   | CRP  | IHF  |
| ptsG   | b1101 | DgsA | ArcA | CRP   | DgsA  | Fis  | ArcA  | DgsA  | ArcA |      |
| yi81_1 | b0016 | CRP  | ArcA | IHF   | CRP   | IHF  | FNR   | CRP   | IHF  |      |

|       |       |       |       |      |       |       |       |       |       |     |
|-------|-------|-------|-------|------|-------|-------|-------|-------|-------|-----|
| dnaJ  | b0015 | rpoH  | CRP   | Fis  | rpoH  | CRP   | IHF   | rpoH  | CRP   |     |
| dnaK  | b0014 | rpoH  | IHF   | CRP  | rpoH  | CRP   | IHF   | rpoH  | IHF   | CRP |
| htgA  | b0012 | rpoH  | Rob   | SoxS | rpoH  | IHF   | FNR   | rpoH  |       |     |
| thiC  | b3994 | CRP   | IHF   | FNR  | CRP   | Lrp   | IHF   | CRP   | IHF   |     |
| thiE  | b3993 | CRP   | Fis   | IHF  | Lrp   | TrpR  | CRP   | CRP   |       |     |
| thiF  | b3992 | H-NS  | CpxR  | Lrp  | Lrp   | CRP   | IHF   | Lrp   |       |     |
| thiG  | b3991 | CRP   | IHF   | FNR  | Lrp   | TrpR  | CRP   | CRP   |       |     |
| talB  | b0008 | FNR   | Fis   | FruR | CRP   | FNR   | ArcA  | FNR   |       |     |
| thrC  | b0004 | IHF   | GadE  | Lrp  | IHF   | Lrp   | CRP   | IHF   | Lrp   |     |
| thrB  | b0003 | Lrp   | CRP   | IHF  | Lrp   | IHF   | CRP   | Lrp   | CRP   | IHF |
| thrA  | b0002 | Lrp   | IHF   | CRP  | IHF   | CRP   | Lrp   | Lrp   | IHF   | CRP |
| htrC  | b3989 | rpoH  | PhoB  | NtrC | rpoH  | Rob   | LexA  | rpoH  |       |     |
| rpoC  | b3988 | ModE  | FNR   | FruR | Fis   | FNR   | ArgR  | FNR   |       |     |
| rpoB  | b3987 | FNR   | ArcA  | Fis  | Fis   | FNR   | ArcA  | FNR   | ArcA  | Fis |
| rplJ  | b3985 | Fis   | FNR   | CRP  | FNR   | Fis   | ArcA  | Fis   | FNR   |     |
| rplA  | b3984 | Fis   | FNR   | CRP  | FNR   | ArcA  | Fis   | Fis   | FNR   |     |
| rplK  | b3983 | Fis   | FNR   | CRP  | FNR   | ArcA  | Fis   | Fis   | FNR   |     |
| nusG  | b3982 | rpoH  | H-NS  | CpxR | CRP   | Fis   | H-NS  | H-NS  |       |     |
| secE  | b3981 | ArgR  | rpoH  | Fis  | Fis   | ArgR  | CRP   | ArgR  | Fis   |     |
| tufB  | b3980 | Fis   | ArcA  | FNR  | Fis   | FNR   | ArcA  | Fis   | ArcA  | FNR |
| b2896 | b2896 | SoxS  | MarA  | LexA | SoxS  | NarL  | CpxR  | SoxS  |       |     |
| fldB  | b2895 | SoxS  | NarL  | rpoH | SoxS  | CpxR  | Nac   | SoxS  |       |     |
| xerD  | b2894 | CpxR  | GadE  | H-NS | CpxR  | rpoH  | FlhDC | CpxR  |       |     |
| dsbC  | b2893 | MalT  | CpxR  | FadR | CpxR  | FlhDC | rpoH  | CpxR  |       |     |
| prfB  | b2891 | Fis   | FNR   | ArcA | Fis   | CpxR  | FNR   | Fis   | FNR   |     |
| lysS  | b2890 | FNR   | CpxR  | MarA | Fis   | rpoH  | CpxR  | CpxR  |       |     |
| murB  | b3972 | H-NS  | Fis   | CRP  | CpxR  | H-NS  | FlhDC | H-NS  |       |     |
| ygfU  | b2888 | GntR  | NarL  | GalR | RcsAB | AllR  | GntR  | GntR  |       |     |
| ygfQ  | b2884 | CusR  | AllR  | Cbl  | AllR  | RcsAB | GntR  | AllR  |       |     |
| yeaN  | b1791 | FadR  | RcsAB | CytR | UxuR  | SoxS  | RcsAB | RcsAB |       |     |
| yeaM  | b1790 | FlhDC | CpxR  | ModE | ArgR  | LexA  | FlhDC | FlhDC |       |     |
| murl  | b3967 | rpoH  | Fis   | CRP  | Lrp   | Fis   | CpxR  | Fis   |       |     |
| btuB  | b3966 | PhoP  | Fur   | Fis  | CpxR  | rpoH  | PhoP  | PhoP  |       |     |
| trmA  | b3965 | rpoH  | Fis   | Nac  | rpoH  | Fis   | CRP   | rpoH  | Fis   |     |
| udhA  | b3962 | CRP   | IHF   | ArcA | ArcA  | CRP   | FNR   | CRP   | ArcA  |     |
| oxyR  | b3961 | OxyR  | H-NS  | Fur  | OxyR  | FruR  | SoxS  | OxyR  |       |     |
| argH  | b3960 | ArgR  | CRP   | IHF  | ArgR  | PhoP  | IHF   | ArgR  | IHF   |     |
| yeaL  | b1789 | ChbR  | NagC  | SoxS | PhoB  | rpoH  | NagC  | NagC  |       |     |
| yeaH  | b1784 | NtrC  | Fis   | CRP  | NtrC  | Fis   | CRP   | NtrC  | Fis   | CRP |
| yeaG  | b1783 | NtrC  | Fis   | IHF  | NtrC  | Fis   | CRP   | NtrC  | Fis   |     |
| mipA  | b1782 | FNR   | ArcA  | CRP  | FNR   | CRP   | IHF   | FNR   | CRP   |     |
| yeaD  | b1780 | IHF   | CRP   | Fis  | CRP   | IHF   | FNR   | IHF   | CRP   |     |
| argB  | b3959 | ArgR  | CRP   | IHF  | ArgR  | CRP   | IHF   | ArgR  | CRP   | IHF |
| argC  | b3958 | ArgR  | CRP   | IHF  | ArgR  | PhoP  | CRP   | ArgR  | CRP   |     |
| argE  | b3957 | ArgR  | CRP   | PurR | ArgR  | GadE  | NtrC  | ArgR  |       |     |
| ppc   | b3956 | Lrp   | CRP   | IHF  | CRP   | FNR   | IHF   | CRP   | IHF   |     |
| pflD  | b3951 | AllR  | GntR  | LsrR | GntR  | CsgD  | AgaR  | GntR  |       |     |
| b2866 | b2866 | GntR  | FhlA  | DeoR | AllR  | AgaR  | GntR  | GntR  |       |     |
| gapA  | b1779 | FruR  | rpoH  | CRP  | rpoH  | FruR  | CRP   | FruR  | rpoH  | CRP |
| yeaA  | b1778 | Fur   | FruR  | ArcA | CRP   | ArcA  | FNR   | ArcA  |       |     |
| b1777 | b1777 | Fur   | FNR   | CRP  | CRP   | ArcA  | FNR   | FNR   | CRP   |     |
| b1776 | b1776 | NagC  | GlpR  | MetJ | NagC  | FlhDC | CpxR  | NagC  |       |     |
| pgm   | b0688 | HU    | Lrp   | GadE | HU    | PhoP  | SoxS  | HU    |       |     |
| seqA  | b0687 | HU    | PhoP  | GadE | HU    | PhoP  | Lrp   | HU    | PhoP  |     |
| b1770 | b1770 | CpxR  | FlhDC | Fis  | CpxR  | FlhDC | Fis   | CpxR  | FlhDC | Fis |
| fldA  | b0684 | SoxS  | FNR   | IHF  | SoxS  | FNR   | CRP   | SoxS  | FNR   |     |
| fur   | b0683 | OxyR  | SoxS  | LexA | OxyR  | SoxS  | Fur   | OxyR  | SoxS  |     |
| ybfM  | b0681 | Lrp   | RcsAB | CpxR | NagC  | RcsAB | rpoH  | RcsAB |       |     |
| gldA  | b3945 | FNR   | IHF   | NarL | NarL  | FlhDC | FruR  | NarL  |       |     |

|       |       |       |       |       |       |       |       |       |       |     |
|-------|-------|-------|-------|-------|-------|-------|-------|-------|-------|-----|
| katG  | b3942 | OxyR  | FNR   | GadE  | OxyR  | FNR   | IHF   | OxyR  | FNR   |     |
| metF  | b3941 | MetJ  | CRP   | PhoP  | MetJ  | rpoH  | CRP   | MetJ  | CRP   |     |
| metL  | b3940 | MetJ  | PhoP  | EnvY  | MetJ  | AIIS  | AIIR  | MetJ  |       |     |
| ansA  | b1767 | rpoH  | PhoP  | SoxS  | PhoP  | CRP   | FNR   | PhoP  |       |     |
| nagE  | b0679 | NagC  | CRP   | ArcA  | NagC  | CpxR  | CRP   | NagC  | CRP   |     |
| topB  | b1763 | NtrC  | H-NS  | rpoH  | PhoB  | UxuR  | rpoH  | rpoH  |       |     |
| nagB  | b0678 | NagC  | CRP   | PhoP  | NagC  | NarL  | PhoP  | NagC  | PhoP  |     |
| b1762 | b1762 | FruR  | MarA  | CpxR  | RcsAB | CpxR  | Fur   | CpxR  |       |     |
| nagA  | b0677 | NagC  | PhoP  | CRP   | NagC  | PhoP  | HU    | NagC  | PhoP  |     |
| gdhA  | b1761 | Nac   | CRP   | IHF   | Nac   | CRP   | Lrp   | Nac   | CRP   |     |
| nagC  | b0676 | NagC  | PhoP  | SdiA  | NagC  | LexA  | HU    | NagC  |       |     |
| nagD  | b0675 | NagC  | AppY  | NarP  | NagC  | SoxS  | PhoP  | NagC  |       |     |
| asnB  | b0674 | GadX  | FNR   | CRP   | GadX  | ArgR  | IHF   | GadX  |       |     |
| metB  | b3939 | PhoP  | MetJ  | MetR  | MetJ  | PhoP  | Fur   | PhoP  | MetJ  |     |
| metJ  | b3938 | Fur   | MetR  | rpoH  | Fur   | IHF   | Lrp   | Fur   |       |     |
| cytR  | b3934 | CytR  | NanR  | FlhDC | CytR  | CRP   | FNR   | CytR  |       |     |
| hslV  | b3932 | rpoH  | CRP   | Fis   | rpoH  | CRP   | IHF   | rpoH  | CRP   |     |
| hslU  | b3931 | rpoH  | Fis   | CRP   | rpoH  | CRP   | IHF   | rpoH  | CRP   |     |
| menA  | b3930 | PhoB  | Fis   | NarL  | PhoB  | RcsAB | SoxS  | PhoB  |       |     |
| yqeF  | b2844 | CRP   | Fis   | ArcA  | Fis   | Rob   | FlhDC | Fis   |       |     |
| araE  | b2841 | AraC  | Cbl   | ModE  | CRP   | AraC  | H-NS  | AraC  |       |     |
| b1755 | b1755 | FruR  | NarL  | NtrC  | UxuR  | SoxS  | NarL  | NarL  |       |     |
| b1754 | b1754 | NarP  | NarL  | PhoB  | ArgR  | FlhDC | NarL  | NarL  |       |     |
| ydjX  | b1750 | RcsAB | NarL  | NikR  | FNR   | NarL  | IHF   | NarL  |       |     |
| yleA  | b0661 | LexA  | MalT  | rpoH  | PurR  | Fis   | LexA  | LexA  |       |     |
| glpF  | b3927 | GlpR  | CRP   | ArcA  | CRP   | GlpR  | FNR   | GlpR  | CRP   |     |
| glpK  | b3926 | CRP   | ArcA  | FNR   | CRP   | FNR   | IHF   | CRP   | FNR   |     |
| glpX  | b3925 | FlhDC | IHF   | FNR   | IHF   | FNR   | NarL  | IHF   | FNR   |     |
| fpr   | b3924 | MarA  | SoxS  | Fur   | SoxS  | MarA  | CRP   | MarA  | SoxS  |     |
| lysA  | b2838 | FNR   | CRP   | Lrp   | Lrp   | MetJ  | ArgR  | Lrp   |       |     |
| yiiQ  | b3920 | SoxS  | GadE  | H-NS  | ArgR  | SoxS  | CpxR  | SoxS  |       |     |
| astC  | b1748 | ArgR  | NtrC  | CRP   | ArgR  | NtrC  | Lrp   | ArgR  | NtrC  |     |
| astA  | b1747 | ArgR  | NtrC  | CRP   | ArgR  | NtrC  | Lrp   | ArgR  | NtrC  |     |
| ygdP  | b2830 | H-NS  | NarL  | CpxR  | FNR   | CpxR  | FlhDC | CpxR  |       |     |
| astD  | b1746 | ArgR  | NtrC  | FruR  | ArgR  | NtrC  | Lrp   | ArgR  | NtrC  |     |
| astB  | b1745 | ArgR  | NtrC  | CRP   | ArgR  | NtrC  | Lrp   | ArgR  | NtrC  |     |
| astE  | b1744 | ArgR  | NtrC  | PhoP  | ArgR  | NtrC  | Lrp   | ArgR  | NtrC  |     |
| ybeY  | b0659 | rpoH  | Fis   | CRP   | rpoH  | PhoP  | CRP   | rpoH  | CRP   |     |
| spy   | b1743 | BaeR  | CpxR  | CRP   | BaeR  | CpxR  | CRP   | BaeR  | CpxR  | CRP |
| ybeX  | b0658 | rpoH  | Fis   | CRP   | rpoH  | IHF   | CRP   | rpoH  | CRP   |     |
| b1742 | b1742 | CpxR  | FlhDC | LexA  | FlhDC | CpxR  | FNR   | CpxR  | FlhDC |     |
| nadE  | b1740 | TyrR  | CpxR  | FruR  | CpxR  | CRP   | IHF   | CpxR  |       |     |
| gltJ  | b0654 | AraC  | FlhDC | PhoB  | FlhDC | ArgR  | NtrC  | FlhDC |       |     |
| gltK  | b0653 | AraC  | FlhDC | PhoB  | FlhDC | NtrC  | IHF   | FlhDC |       |     |
| gltL  | b0652 | FlhDC | rpoH  | RbsR  | FlhDC | NtrC  | Lrp   | FlhDC |       |     |
| sbp   | b3917 | IHF   | CRP   | FNR   | CysB  | FlhDC | IHF   | IHF   |       |     |
| pfkA  | b3916 | FruR  | NarL  | Rob   | FruR  | Fis   | FNR   | FruR  |       |     |
| b3914 | b3914 | CpxR  | ArcA  | CRP   | CpxR  | CRP   | IHF   | CpxR  | CRP   |     |
| b3913 | b3913 | CpxR  | CRP   | Fis   | CRP   | CpxR  | IHF   | CpxR  | CRP   |     |
| cpxR  | b3912 | CpxR  | Fur   | GadE  | CpxR  | SoxS  | rpoH  | CpxR  |       |     |
| thyA  | b2827 | CpxR  | OmpR  | rpoH  | rpoH  | CpxR  | Fis   | CpxR  | rpoH  |     |
| ppdB  | b2825 | AgaR  | GntR  | Cbl   | AgaR  | GntR  | NagC  | AgaR  | GntR  |     |
| osmE  | b1739 | Fis   | SoxS  | IHF   | Fis   | IHF   | CRP   | Fis   | IHF   |     |
| celA  | b1738 | NagC  | ChbR  | AIIS  | NagC  | Fis   | IHF   | NagC  |       |     |
| celB  | b1737 | NagC  | ChbR  | CusR  | NagC  | PurR  | NarL  | NagC  |       |     |
| celD  | b1735 | NagC  | ChbR  | EvgA  | NagC  | RcsAB | FlhDC | NagC  |       |     |
| celF  | b1734 | NagC  | ChbR  | CusR  | NagC  | RcsAB | CpxR  | NagC  |       |     |
| ydjC  | b1733 | ChbR  | NagC  | SoxS  | NagC  | UxuR  | LexA  | NagC  |       |     |
| katE  | b1732 | NtrC  | IHF   | CRP   | H-NS  | CRP   | IHF   | IHF   | CRP   |     |

|       |       |       |        |        |      |        |        |       |        |      |  |
|-------|-------|-------|--------|--------|------|--------|--------|-------|--------|------|--|
| ybeL  | b0643 | H-NS  | Fis    | MarA   | CRP  | FNR    | H-NS   | H-NS  |        |      |  |
| leuS  | b0642 | NarL  | rpoH   | FNR    | H-NS | PhoP   | FNR    | FNR   |        |      |  |
| sodA  | b3908 | Rob   | MarA   | SoxS   | Rob  | SoxS   | MarA   | Rob   | MarA   | SoxS |  |
| argA  | b2818 | ArgR  | CRP    | PurR   | ArgR | CRP    | IHF    | ArgR  | CRP    |      |  |
| b1729 | b1729 | IHF   | FNR    | CysB   | IHF  | H-NS   | CRP    | IHF   |        |      |  |
| b1728 | b1728 | LexA  | CpxR   | FliHDC | LexA | rpoH   | CpxR   | LexA  | CpxR   |      |  |
| b1724 | b1724 | Fis   | IHF    | CRP    | CRP  | ArcA   | H-NS   | CRP   |        |      |  |
| b1722 | b1722 | FNR   | IHF    | CRP    | CRP  | IHF    | FNR    | FNR   | IHF    | CRP  |  |
| b1720 | b1720 | LrhA  | CpxR   | FliHDC | CpxR | Fis    | rpoH   | CpxR  |        |      |  |
| mrdA  | b0635 | Fis   | FNR    | CRP    | PurR | rpoH   | Fis    | Fis   |        |      |  |
| dacA  | b0632 | Fis   | Lrp    | FNR    | Fis  | CpxR   | CRP    | Fis   |        |      |  |
| ybeD  | b0631 | rpoH  | TrpR   | OxyR   | rpoH | CRP    | IHF    | rpoH  |        |      |  |
| b2809 | b2809 | IHF   | H-NS   | FNR    | IHF  | ArcA   | CRP    | IHF   |        |      |  |
| fucR  | b2805 | FucR  | AraC   | DcuR   | FucR | CpxR   | CRP    | FucR  |        |      |  |
| fucU  | b2804 | FucR  | CRP    | FNR    | FucR | rpoH   | CpxR   | FucR  |        |      |  |
| fucK  | b2803 | FucR  | CdaR   | LsrR   | FucR | CpxR   | FliHDC | FucR  |        |      |  |
| fucI  | b2802 | FucR  | FliHDC | CRP    | FucR | FliHDC | NarL   | FucR  | FliHDC |      |  |
| infC  | b1718 | FNR   | Fis    | CRP    | FNR  | CpxR   | Fis    | FNR   | Fis    |      |  |
| fucP  | b2801 | FucR  | RcsAB  | GlpR   | FucR | CRP    | Fis    | FucR  |        |      |  |
| rpmI  | b1717 | rpoH  | FNR    | Fis    | FNR  | IHF    | CRP    | FNR   |        |      |  |
| fucA  | b2800 | GntR  | FucR   | GalR   | FucR | Fis    | CRP    | FucR  |        |      |  |
| rplT  | b1716 | rpoH  | FNR    | TyrR   | FNR  | IHF    | ArcA   | FNR   |        |      |  |
| pheS  | b1714 | ArcA  | FNR    | Fis    | Fis  | CRP    | IHF    | Fis   |        |      |  |
| crcB  | b0624 | OxyR  | LexA   | GntR   | OxyR | CpxR   | Lrp    | OxyR  |        |      |  |
| crcA  | b0622 | PhoP  | RcsAB  | PhoB   | PhoP | PhoB   | ArgR   | PhoP  | PhoB   |      |  |
| nlpC  | b1708 | CpxR  | PhoB   | TrpR   | Fis  | CpxR   | IHF    | CpxR  |        |      |  |
| b1707 | b1707 | PhoB  | CpxR   | DicA   | CpxR | PhoB   | NarL   | PhoB  | CpxR   |      |  |
| b1706 | b1706 | IscR  | Fur    | CRP    | IscR | SoxS   | IHF    | IscR  |        |      |  |
| aroH  | b1704 | TrpR  | IHF    | CRP    | TrpR | FruR   | FNR    | TrpR  |        |      |  |
| citC  | b0618 | CsgD  | LexA   | AgaR   | AgaR | NarL   | Fur    | AgaR  |        |      |  |
| ppsA  | b1702 | FruR  | CRP    | ArcA   | FruR | CRP    | Fis    | FruR  | CRP    |      |  |
| rna   | b0611 | rpoH  | CpxR   | PhoP   | SoxS | Fis    | CpxR   | CpxR  |        |      |  |
| ybdR  | b0608 | RcsAB | GadW   | FliA   | CpxR | Lrp    | RcsAB  | RcsAB |        |      |  |
| ybdQ  | b0607 | rpoH  | Fur    | NarL   | rpoH | CRP    | FNR    | rpoH  |        |      |  |
| ahpF  | b0606 | OxyR  | MetJ   | CRP    | MetJ | OxyR   | FNR    | OxyR  | MetJ   |      |  |
| ahpC  | b0605 | OxyR  | MetJ   | Fur    | MetJ | OxyR   | IHF    | OxyR  | MetJ   |      |  |
| ybdL  | b0600 | rpoH  | NarL   | CRP    | rpoH | ArgR   | PurR   | rpoH  |        |      |  |
| creB  | b4398 | AraC  | GntR   | ModE   | HyfR | BaeR   | GntR   | GntR  |        |      |  |
| creA  | b4397 | AraC  | PhoB   | NagC   | SoxS | AlsR   | PhoB   | PhoB  |        |      |  |
| rob   | b4396 | MarA  | Fur    | IHF    | MarA | NarL   | CpxR   | MarA  |        |      |  |
| trpR  | b4393 | TrpR  | GalR   | GalS   | TrpR | ChbR   | HyfR   | TrpR  |        |      |  |
| deoD  | b4384 | ModE  | CytR   | DeoR   | ModE | CytR   | Fis    | ModE  | CytR   |      |  |
| deoB  | b4383 | ModE  | CytR   | DeoR   | ModE | Fis    | CytR   | ModE  | CytR   |      |  |
| rpmJ  | b3299 | Fis   | FNR    | ArgR   | FNR  | Fis    | ArcA   | Fis   | FNR    |      |  |
| deoA  | b4382 | ModE  | CytR   | DeoR   | ModE | CytR   | Fis    | ModE  | CytR   |      |  |
| rpsM  | b3298 | FNR   | ArcA   | Fis    | FNR  | Fis    | ArcA   | FNR   | ArcA   | Fis  |  |
| deoC  | b4381 | ModE  | CytR   | DeoR   | ModE | CytR   | Fis    | ModE  | CytR   |      |  |
| rpsK  | b3297 | FNR   | ArcA   | Fis    | FNR  | Fis    | ArcA   | FNR   | ArcA   | Fis  |  |
| yjiI  | b4380 | LexA  | NarL   | ModE   | NarL | FNR    | IHF    | NarL  |        |      |  |
| rpsD  | b3296 | FNR   | ArcA   | Fis    | FNR  | ArcA   | Fis    | FNR   | ArcA   | Fis  |  |
| rpoA  | b3295 | FNR   | ArcA   | Fis    | FNR  | ArcA   | Fis    | FNR   | ArcA   | Fis  |  |
| rplQ  | b3294 | FNR   | Fis    | ArcA   | FNR  | Fis    | CRP    | FNR   | Fis    |      |  |
| yjiU  | b4377 | Lrp   | NarL   | IHF    | H-NS | Lrp    | CRP    | Lrp   |        |      |  |
| osmY  | b4376 | Lrp   | IHF    | CRP    | Lrp  | IHF    | CRP    | Lrp   | IHF    | CRP  |  |
| prfC  | b4375 | Fis   | LexA   | CRP    | Fis  | FNR    | IHF    | Fis   |        |      |  |
| yjiG  | b4374 | CpxR  | NagC   | PhoB   | Fis  | CpxR   | PurR   | CpxR  |        |      |  |
| rimI  | b4373 | Lrp   | CpxR   | LexA   | rpoH | LexA   | Fis    | LexA  |        |      |  |
| rrmB  | b3289 | CpxR  | rpoH   | ArgR   | CpxR | IHF    | FNR    | CpxR  |        |      |  |
| holD  | b4372 | Nac   | LexA   | Fis    | Fis  | LexA   | CRP    | LexA  | Fis    |      |  |

|       |       |       |       |      |       |       |       |       |       |      |
|-------|-------|-------|-------|------|-------|-------|-------|-------|-------|------|
| rsmC  | b4371 | CpxR  | CRP   | rpoH | Nac   | LexA  | CpxR  | CpxR  |       |      |
| smg   | b3284 | CpxR  | CRP   | Fis  | CpxR  | CRP   | H-NS  | CpxR  | CRP   |      |
| yrdD  | b3283 | H-NS  | CpxR  | CRP  | CRP   | FNR   | H-NS  | H-NS  | CRP   |      |
| ccmC  | b2199 | NarP  | Cbl   | MngR | NarP  | TyrR  | NarL  | NarP  |       |      |
| yrdC  | b3282 | PhoP  | H-NS  | CpxR | CpxR  | FNR   | IHF   | CpxR  |       |      |
| ccmD  | b2198 | NarP  | ModE  | PspF | NarP  | ModE  | SoxS  | NarP  | ModE  |      |
| aroE  | b3281 | CpxR  | AgaR  | rpoH | CpxR  | IHF   | FNR   | CpxR  |       |      |
| fhfF  | b4367 | Fur   | FNR   | IHF  | Fur   | IHF   | CRP   | Fur   | IHF   |      |
| bgIJ  | b4366 | Fur   | CRP   | Fis  | Fur   | IHF   | H-NS  | Fur   |       |      |
| rplY  | b2185 | rpoH  | CRP   | Fis  | Fis   | FNR   | CRP   | CRP   | Fis   |      |
| holB  | b1099 | PurR  | ArgR  | Fis  | Fis   | LexA  | FruR  | Fis   |       |      |
| tmk   | b1098 | NhaR  | FlhDC | CpxR | LexA  | CpxR  | Fis   | CpxR  |       |      |
| fabF  | b1095 | FNR   | CRP   | Fis  | Fis   | CRP   | ArcA  | CRP   | Fis   |      |
| fabG  | b1093 | Fis   | Lrp   | FNR  | Fis   | CRP   | FNR   | Fis   | FNR   |      |
| fabD  | b1092 | GadE  | CpxR  | FNR  | Fis   | FNR   | ArcA  | FNR   |       |      |
| fabH  | b1091 | Fis   | GadE  | CpxR | Fis   | ArcA  | FNR   | Fis   |       |      |
| plsX  | b1090 | Fis   | CRP   | FNR  | Fis   | FNR   | ArcA  | Fis   | FNR   |      |
| yjiZ  | b4356 | CpxR  | FlhDC | GadE | LexA  | CpxR  | Fur   | CpxR  |       |      |
| tsr   | b4355 | CpxR  | FlhDC | H-NS | CpxR  | FlhDC | FNR   | CpxR  | FlhDC |      |
| fis   | b3261 | Fis   | IHF   | CRP  | Fis   | IHF   | CRP   | Fis   | IHF   | CRP  |
| yhdG  | b3260 | Fis   | IHF   | CRP  | Fis   | IHF   | CRP   | Fis   | IHF   | CRP  |
| spr   | b2175 | H-NS  | IHF   | CRP  | CRP   | IHF   | Lrp   | IHF   | CRP   |      |
| rpmF  | b1089 | Fis   | SoxS  | rpoH | FNR   | Fis   | IHF   | Fis   |       |      |
| yceD  | b1088 | CpxR  | FNR   | rpoH | FNR   | Fis   | CRP   | FNR   |       |      |
| b1085 | b1085 | FlhDC | CpxR  | NagC | CpxR  | FlhDC | ArgR  | FlhDC | CpxR  |      |
| flgL  | b1083 | FlhDC | H-NS  | CpxR | FlhDC | CpxR  | H-NS  | FlhDC | H-NS  | CpxR |
| flgK  | b1082 | FlhDC | H-NS  | FNR  | FlhDC | H-NS  | CpxR  | FlhDC | H-NS  |      |
| flgJ  | b1081 | FlhDC | FNR   | ArcA | FlhDC | H-NS  | FNR   | FlhDC | FNR   |      |
| flgI  | b1080 | FlhDC | FNR   | ArcA | FlhDC | H-NS  | FNR   | FlhDC | FNR   |      |
| hsdM  | b4349 | RcsAB | SoxS  | MarA | CpxR  | ArgR  | SoxS  | SoxS  |       |      |
| hsdS  | b4348 | IHF   | CRP   | Fis  | rpoH  | IHF   | Fis   | IHF   | Fis   |      |
| mcrB  | b4346 | rpoH  | CpxR  | Fis  | CRP   | CpxR  | ArcA  | CpxR  |       |      |
| mcrD  | b4344 | CsgD  | NikR  | GntR | NagC  | GntR  | FlhDC | GntR  |       |      |
| yjiT  | b4342 | H-NS  | IHF   | CpxR | FlhDC | H-NS  | IHF   | H-NS  | IHF   |      |
| accC  | b3256 | FNR   | Fis   | ArcA | Fis   | CRP   | FNR   | FNR   | Fis   |      |
| accB  | b3255 | FNR   | CRP   | ArcA | Fis   | CRP   | FNR   | FNR   | CRP   |      |
| fruB  | b2169 | FruR  | CRP   | IHF  | FruR  | FNR   | CRP   | FruR  | CRP   |      |
| fruK  | b2168 | FruR  | IHF   | FNR  | FruR  | CRP   | FNR   | FruR  | FNR   |      |
| mreB  | b3251 | FlhDC | Fis   | CRP  | FlhDC | CpxR  | Fis   | FlhDC | Fis   |      |
| fruA  | b2167 | FruR  | CRP   | FNR  | FruR  | Fur   | RcsAB | FruR  |       |      |
| mreC  | b3250 | FlhDC | Fis   | FruR | FlhDC | LexA  | rpoH  | FlhDC |       |      |
| flgH  | b1079 | FlhDC | FNR   | CpxR | FlhDC | H-NS  | FNR   | FlhDC | FNR   |      |
| yeiL  | b2163 | MprA  | CsgD  | AraC | Rob   | NagC  | CsgD  | CsgD  |       |      |
| flgG  | b1078 | FlhDC | FNR   | ArcA | FlhDC | H-NS  | FNR   | FlhDC | FNR   |      |
| flgF  | b1077 | FlhDC | FNR   | ArcA | FlhDC | H-NS  | FNR   | FlhDC | FNR   |      |
| flgE  | b1076 | FlhDC | H-NS  | CpxR | FlhDC | H-NS  | FNR   | FlhDC | H-NS  |      |
| flgD  | b1075 | FlhDC | H-NS  | CpxR | FlhDC | FNR   | H-NS  | FlhDC | H-NS  |      |
| flgC  | b1074 | FlhDC | CpxR  | H-NS | FlhDC | H-NS  | FNR   | FlhDC | H-NS  |      |
| flgB  | b1073 | FlhDC | CpxR  | H-NS | FlhDC | H-NS  | FNR   | FlhDC | H-NS  |      |
| flgA  | b1072 | FlhDC | CpxR  | H-NS | FlhDC | FNR   | H-NS  | FlhDC | H-NS  |      |
| flgM  | b1071 | FlhDC | CpxR  | H-NS | FlhDC | H-NS  | FNR   | FlhDC | H-NS  |      |
| flgN  | b1070 | FlhDC | CpxR  | H-NS | FlhDC | H-NS  | FNR   | FlhDC | H-NS  |      |
| yjiL  | b4334 | Cbl   | Rob   | HU   | Rob   | ModE  | GntR  | Rob   |       |      |
| yhdE  | b3248 | FlhDC | NtrC  | ModE | FlhDC | CpxR  | AgaR  | FlhDC |       |      |
| rng   | b3247 | FlhDC | ArgR  | LexA | FlhDC | ExuR  | MarA  | FlhDC |       |      |
| nfo   | b2159 | Rob   | MarA  | SoxS | Rob   | SoxS  | MarA  | Rob   | MarA  | SoxS |
| lysP  | b2156 | CRP   | Fur   | FNR  | CRP   | ArcA  | Fis   | CRP   |       |      |
| cirA  | b2155 | Fur   | CRP   | FNR  | Fur   | CRP   | IHF   | Fur   | CRP   |      |
| yeiG  | b2154 | FruR  | H-NS  | Fis  | TrpR  | FlhDC | FruR  | FruR  |       |      |



|      |       |      |       |       |       |       |       |       |       |  |       |
|------|-------|------|-------|-------|-------|-------|-------|-------|-------|--|-------|
| foIE | b2153 | CRP  | Fis   | NtrC  | FNR   | CRP   | IHF   | CRP   |       |  |       |
| galS | b2151 | GalR | GalS  | CRP   | FlhDC | GalR  | GalS  | GalR  | GalS  |  |       |
| rimJ | b1066 | PhoB | CpxR  | Fur   | FNR   | CRP   | CpxR  | CpxR  |       |  |       |
| mgIB | b2150 | GalR | GalS  | FlhDC | GalR  | GalS  | FlhDC | GalR  | GalS  |  | FlhDC |
| pyrC | b1062 | PurR | IHF   | ArgR  | PurR  | CRP   | FNR   | PurR  |       |  |       |
| dinI | b1061 | LexA | SoxS  | CpxR  | LexA  | CRP   | ArcA  | LexA  |       |  |       |
| yceP | b1060 | rpoH | MarA  | CaiF  | rpoH  | CRP   | FNR   | rpoH  |       |  |       |
| yjiD | b4326 | Rob  | FNR   | Fur   | FNR   | IHF   | Lrp   | FNR   |       |  |       |
| yjiC | b4325 | AgaR | TdcA  | TdcR  | AgaR  | RcsAB | rpoH  | AgaR  |       |  |       |
| uxuR | b4324 | UxuR | ExuR  | FruR  | ExuR  | BirA  | MetR  | ExuR  |       |  |       |
| uxuB | b4323 | UxuR | GadE  | GadX  | ExuR  | UxuR  | CysB  | UxuR  |       |  |       |
| uxuA | b4322 | UxuR | ExuR  | CRP   | ExuR  | UxuR  | CRP   | UxuR  | ExuR  |  | CRP   |
| yhcN | b3238 | IHF  | CRP   | FNR   | CRP   | IHF   | ArcA  | IHF   | CRP   |  |       |
| gntP | b4321 | UxuR | CRP   | FlhDC | UxuR  | AgaR  | NagC  | UxuR  |       |  |       |
| argR | b3237 | ArgR | MelR  | CytR  | ArgR  | rpoH  | PhoP  | ArgR  |       |  |       |
| fimH | b4320 | Lrp  | FlhDC | H-NS  | Lrp   | IHF   | H-NS  | Lrp   | H-NS  |  |       |
| mdh  | b3236 | ArcA | CRP   | FlhDC | FlhDC | ArcA  | CRP   | ArcA  | CRP   |  | FlhDC |
| mgIA | b2149 | GalR | GalS  | FlhDC | FlhDC | GalR  | GalS  | GalR  | GalS  |  | FlhDC |
| mgIC | b2148 | GalR | GalS  | FlhDC | FlhDC | Fis   | GalR  | GalR  | FlhDC |  |       |
| rplM | b3231 | FNR  | ArcA  | Fis   | FNR   | ArcA  | Fis   | FNR   | ArcA  |  | Fis   |
| rpsI | b3230 | FNR  | Fis   | ArcA  | FNR   | ArcA  | Fis   | FNR   | Fis   |  | ArcA  |
| solA | b1059 | PhoB | CpxR  | TrpR  | CpxR  | rpoH  | RcsAB | CpxR  |       |  |       |
| cdd  | b2143 | CytR | CRP   | Fis   | CytR  | CRP   | FNR   | CytR  | CRP   |  |       |
| yceA | b1055 | Fis  | IHF   | CRP   | FNR   | CRP   | ArcA  | CRP   |       |  |       |
| htrB | b1054 | ArgR | PhoB  | FruR  | PurR  | TyrR  | PhoB  | PhoB  |       |  |       |
| yceE | b1053 | CytR | SoxS  | CdaR  | SoxS  | Fis   | MarA  | SoxS  |       |  |       |
| msyB | b1051 | NtrC | FNR   | IHF   | IHF   | CRP   | Fis   | IHF   |       |  |       |
| fimG | b4319 | Lrp  | H-NS  | FlhDC | Lrp   | H-NS  | IHF   | Lrp   | H-NS  |  |       |
| fimF | b4318 | Lrp  | H-NS  | FlhDC | Lrp   | H-NS  | IHF   | Lrp   | H-NS  |  |       |
| fimD | b4317 | H-NS | Lrp   | IHF   | Lrp   | AgaR  | H-NS  | H-NS  | Lrp   |  |       |
| fimC | b4316 | Lrp  | H-NS  | IHF   | Lrp   | H-NS  | IHF   | Lrp   | H-NS  |  | IHF   |
| fimI | b4315 | H-NS | Lrp   | IHF   | Lrp   | H-NS  | IHF   | H-NS  | Lrp   |  | IHF   |
| fimA | b4314 | Lrp  | H-NS  | IHF   | Lrp   | H-NS  | IHF   | Lrp   | H-NS  |  | IHF   |
| fimB | b4312 | H-NS | PhoB  | MalT  | H-NS  | CRP   | IHF   | H-NS  |       |  |       |
| sspB | b3228 | LexA | rpoH  | CpxR  | CpxR  | LexA  | FNR   | LexA  | CpxR  |  |       |
| yjhA | b4311 | NagC | NanR  | CdaR  | NagC  | NanR  | GntR  | NagC  | NanR  |  |       |
| dcuD | b3227 | PhoP | IHF   | CRP   | BaeR  | PhoP  | FlhDC | PhoP  |       |  |       |
| yjhT | b4310 | NagC | NanR  | CRP   | NagC  | NanR  | CpxR  | NagC  | NanR  |  |       |
| nanR | b3226 | NarL | SoxS  | DicA  | PhoP  | NagC  | SoxS  | SoxS  |       |  |       |
| nanA | b3225 | NanR | CRP   | ArcA  | NanR  | CRP   | FNR   | NanR  | CRP   |  |       |
| nanT | b3224 | NanR | FlhDC | CRP   | NanR  | CRP   | FNR   | NanR  | CRP   |  |       |
| nanE | b3223 | NanR | NikR  | TrpR  | NanR  | CRP   | FNR   | NanR  |       |  |       |
| nanK | b3222 | NtrC | Zur   | FlhDC | NanR  | FlhDC | NarL  | FlhDC |       |  |       |
| yhcH | b3221 | NanR | FlhDC | CRP   | NanR  | CRP   | FNR   | NanR  | CRP   |  |       |
| yohF | b2137 | MarA | H-NS  | SoxS  | SoxS  | NtrC  | RcsAB | SoxS  |       |  |       |
| yohD | b2136 | FadR | Rob   | SoxS  | SoxS  | ModE  | FruR  | SoxS  |       |  |       |
| dld  | b2133 | ArgR | PurR  | FNR   | FNR   | CRP   | ArcA  | FNR   |       |  |       |
| mdoG | b1048 | FNR  | Fis   | IHF   | LexA  | FNR   | Fis   | FNR   | Fis   |  |       |
| yehZ | b2131 | BaeR | RcsAB | OxyR  | RcsAB | OxyR  | NarL  | RcsAB | OxyR  |  |       |
| csgA | b1042 | CsgD | CpxR  | GadX  | CsgD  | CpxR  | ArgR  | CsgD  | CpxR  |  |       |
| csgB | b1041 | CsgD | CpxR  | OmpR  | CsgD  | CpxR  | ArgR  | CsgD  | CpxR  |  |       |
| csgD | b1040 | CsgD | RcsAB | OmpR  | RcsAB | CsgD  | CpxR  | CsgD  | RcsAB |  |       |
| yjhS | b4309 | CdaR | NagC  | CysB  | NagC  | GntR  | RcsAB | NagC  |       |  |       |
| yjhR | b4308 | LexA | Fur   | NarL  | rpoH  | NagC  | LexA  | LexA  |       |  |       |
| yjhQ | b4307 | Cbl  | MprA  | Rob   | Rob   | TrpR  | NagC  | Rob   |       |  |       |
| sgcE | b4301 | GntR | IdnR  | RcsAB | GntR  | AlIS  | CsgD  | GntR  |       |  |       |
| sgcR | b4300 | MarA | FadR  | GntR  | GntR  | LexA  | FlhDC | GntR  |       |  |       |
| glfF | b3214 | Nac  | GadE  | ArgR  | ArgR  | Nac   | Lrp   | Nac   | ArgR  |  |       |
| glfD | b3213 | Nac  | ArgR  | GadE  | Nac   | ArgR  | Lrp   | Nac   | ArgR  |  |       |

|        |       |      |       |       |       |       |       |       |      |           |
|--------|-------|------|-------|-------|-------|-------|-------|-------|------|-----------|
| gltB   | b3212 | Nac  | GadE  | ArgR  | Nac   | ArgR  | Lrp   | Nac   | ArgR |           |
| yehW   | b2128 | MprA | CsgD  | GntR  | AsnC  | MprA  | AllR  | MprA  |      |           |
| yehV   | b2127 | OmpR | MarA  | CpxR  | NtrC  | SoxS  | CpxR  | CpxR  |      |           |
| yehT   | b2125 | Fis  | H-NS  | CRP   | IHF   | CRP   | FlhDC | CRP   |      |           |
| csgE   | b1039 | CsgD | RcsAB | OmpR  | RcsAB | CsgD  | CpxR  | CsgD  |      | RcsAB     |
| csgF   | b1038 | CsgD | RcsAB | OmpR  | CsgD  | RcsAB | CpxR  | CsgD  |      | RcsAB     |
| csgG   | b1037 | CsgD | RcsAB | OmpR  | RcsAB | CsgD  | CpxR  | CsgD  |      | RcsAB     |
| ycdX   | b1034 | MprA | PhoP  | Cbl   | FlhDC | FNR   | PhoP  | PhoP  |      |           |
| yrbL   | b3207 | PhoP | CpxR  | rpoH  | PhoP  | CRP   | IHF   | PhoP  |      |           |
| ptsO   | b3206 | NarP | NarL  | CpxR  | CpxR  | Lrp   | NarL  | NarL  |      | CpxR      |
| yhbJ   | b3205 | rpoH | ModE  | CRP   | Lrp   | FNR   | CRP   | CRP   |      |           |
| yehL   | b2119 | FhlA | HyfR  | AtoC  | HyfR  | PhoB  | CsgD  | HyfR  |      |           |
| rpoN   | b3202 | rpoH | CRP   | Fis   | Lrp   | FruR  | Fis   | Fis   |      |           |
| yhbG   | b3201 | rpoH | GntR  | H-NS  | CpxR  | rpoH  | FlhDC | rpoH  |      |           |
| yhbN   | b3200 | rpoH | Fis   | ModE  | rpoH  | SoxS  | CpxR  | rpoH  |      |           |
| molR_2 | b2116 | PhoP | PdhR  | RcsAB | NagC  | RcsAB | LexA  | RcsAB |      |           |
| ycdT   | b1025 | NhaR | CpxR  | H-NS  | CpxR  | LexA  | PhoB  | CpxR  |      |           |
| ycdP   | b1021 | NhaR | PhoB  | AraC  | rpoH  | CpxR  | PhoB  | PhoB  |      |           |
| phoH   | b1020 | PhoB | CRP   | Fis   | PhoB  | CRP   | IHF   | PhoB  |      | CRP       |
| thiM   | b2104 | Fur  | H-NS  | CpxR  | Lrp   | H-NS  | CpxR  | H-NS  |      | CpxR      |
| ycdO   | b1018 | Fur  | CRP   | FNR   | CRP   | IHF   | FNR   | CRP   |      | FNR       |
| b1017  | b1017 | OmpR | Fur   | GadE  | Fur   | CRP   | IHF   | Fur   |      |           |
| b2100  | b2100 | Rob  | GntR  | FhlA  | UxuR  | RcsAB | Rob   | Rob   |      |           |
| putP   | b1015 | CRP  | IHF   | FNR   | CRP   | Lrp   | IHF   | CRP   |      | IHF       |
| b1012  | b1012 | CsgD | PhoP  | OmpR  | PhoP  | NtrC  | ArcA  | PhoP  |      |           |
| ycdG   | b1006 | PhoP | NtrC  | ArcA  | PhoP  | NtrC  | ArcA  | PhoP  |      | NtrC ArcA |
| ycdF   | b1005 | Fis  | FNR   | H-NS  | H-NS  | CRP   | IHF   | H-NS  |      |           |
| wrbA   | b1004 | FNR  | IHF   | CRP   | IHF   | CRP   | Fis   | IHF   |      | CRP       |
| agp    | b1002 | CRP  | Fis   | FNR   | CRP   | FNR   | IHF   | CRP   |      | FNR       |
| cbpA   | b1000 | H-NS | FNR   | ArcA  | Lrp   | H-NS  | CRP   | H-NS  |      |           |
| fdoG   | b3894 | FNR  | CRP   | IHF   | IHF   | CRP   | Fis   | CRP   |      | IHF       |
| fdoI   | b3892 | FNR  | IHF   | CRP   | IHF   | FNR   | CRP   | FNR   |      | IHF CRP   |
| exo    | b2798 | DhaR | GntR  | IclR  | GntR  | NhaR  | PhoP  | GntR  |      |           |
| sdaB   | b2797 | H-NS | CRP   | Lrp   | Fis   | IHF   | CRP   | CRP   |      |           |
| sdaC   | b2796 | ArcA | CRP   | FNR   | CRP   | IHF   | ArcA  | ArcA  |      | CRP       |
| ygdH   | b2795 | Lrp  | CRP   | FNR   | PurR  | FNR   | CRP   | CRP   |      | FNR       |
| yihK   | b3871 | Fis  | CRP   | FNR   | Fis   | FNR   | ArcA  | Fis   |      | FNR       |
| glnA   | b3870 | NtrC | Fis   | CRP   | NtrC  | Fis   | CRP   | NtrC  |      | Fis CRP   |
| barA   | b2786 | ModE | NarP  | GadX  | PaaX  | CaiF  | NarP  | NarP  |      |           |
| relA   | b2784 | Rob  | IscR  | NarL  | H-NS  | CpxR  | NarL  | NarL  |      |           |
| ydiS   | b1699 | NagC | ChbR  | CysB  | UxuR  | NagC  | ExuR  | NagC  |      |           |
| chpA   | b2782 | FruR | H-NS  | CpxR  | Fis   | H-NS  | CRP   | H-NS  |      |           |
| mazG   | b2781 | Fis  | rpoH  | H-NS  | Fis   | H-NS  | CpxR  | Fis   |      | H-NS      |
| pyrG   | b2780 | FNR  | CRP   | ArcA  | Fis   | CRP   | FNR   | FNR   |      | CRP       |
| glnL   | b3869 | NtrC | Fis   | CRP   | NtrC  | Fis   | CRP   | NtrC  |      | Fis CRP   |
| glnG   | b3868 | NtrC | Fis   | CRP   | NtrC  | AgaR  | HyfR  | NtrC  |      |           |
| hemN   | b3867 | H-NS | NtrC  | CpxR  | PhoB  | ArgR  | CpxR  | CpxR  |      |           |
| yihI   | b3866 | PurR | PhoP  | MetJ  | Fur   | CpxR  | PurR  | PurR  |      |           |
| polA   | b3863 | DnaA | H-NS  | CpxR  | PurR  | CpxR  | NarL  | CpxR  |      |           |
| eno    | b2779 | FruR | FNR   | ArcA  | FruR  | rpoH  | Fis   | FruR  |      |           |
| dsbA   | b3860 | CpxR | MarA  | PurR  | CpxR  | IHF   | FNR   | CpxR  |      |           |
| ygcS   | b2771 | FhlA | NarL  | PhoB  | PhoB  | NagC  | EvgA  | PhoB  |      |           |
| ydiJ   | b1687 | CRP  | Fis   | IHF   | Lrp   | IHF   | H-NS  | IHF   |      |           |
| b1685  | b1685 | CRP  | GadE  | H-NS  | CRP   | FNR   | ArcA  | CRP   |      |           |
| ydiC   | b1684 | OxyR | IscR  | Fur   | OxyR  | Fur   | IHF   | OxyR  |      | Fur       |
| ynhE   | b1683 | OxyR | IscR  | Fur   | OxyR  | Fur   | IscR  | OxyR  |      | IscR Fur  |
| cstA   | b0598 | CRP  | ArcA  | Fis   | CRP   | ArcA  | FNR   | CRP   |      | ArcA      |
| ynhD   | b1682 | OxyR | IscR  | Fur   | OxyR  | Fur   | IHF   | OxyR  |      | Fur       |
| ybdB   | b0597 | Fur  | CRP   | OxyR  | Fur   | CRP   | IHF   | Fur   |      | CRP       |

|       |       |       |       |       |       |      |       |       |      |     |
|-------|-------|-------|-------|-------|-------|------|-------|-------|------|-----|
| sufD  | b1681 | OxyR  | IscR  | Fur   | OxyR  | Fur  | IscR  | OxyR  | IscR | Fur |
| entA  | b0596 | Fur   | CRP   | IHF   | Fur   | CRP  | IHF   | Fur   | CRP  | IHF |
| sufS  | b1680 | OxyR  | IscR  | Fur   | OxyR  | Fur  | IscR  | OxyR  | IscR | Fur |
| entB  | b0595 | Fur   | CRP   | IHF   | Fur   | CRP  | IHF   | Fur   | CRP  | IHF |
| entE  | b0594 | Fur   | CRP   | FNR   | Fur   | CRP  | IHF   | Fur   | CRP  |     |
| entC  | b0593 | Fur   | CRP   | FNR   | Fur   | CRP  | IHF   | Fur   | CRP  |     |
| fepB  | b0592 | Fur   | CpxR  | IscR  | Fur   | CRP  | IHF   | Fur   |      |     |
| ybdA  | b0591 | Fur   | PhoP  | GadE  | Fur   | CRP  | FNR   | Fur   |      |     |
| yihE  | b3859 | CpxR  | H-NS  | Fis   | CpxR  | H-NS | FNR   | CpxR  | H-NS |     |
| cysJ  | b2764 | CysB  | IHF   | CRP   | CysB  | IHF  | H-NS  | CysB  | IHF  |     |
| cysI  | b2763 | CysB  | IHF   | CRP   | CysB  | IHF  | CRP   | CysB  | IHF  | CRP |
| ynhA  | b1679 | OxyR  | IscR  | MarA  | OxyR  | Fur  | IscR  | OxyR  | IscR |     |
| cysH  | b2762 | CysB  | IHF   | CRP   | CysB  | IHF  | CRP   | CysB  | IHF  | CRP |
| ynhG  | b1678 | NtrC  | IHF   | CRP   | Fis   | CRP  | IHF   | IHF   | CRP  |     |
| lpp   | b1677 | IHF   | OxyR  | CpxR  | CRP   | CpxR | FNR   | CpxR  |      |     |
| b2760 | b2760 | GntR  | FhlA  | NagC  | CpxR  | GadE | GntR  | GntR  |      |     |
| pykF  | b1676 | FruR  | IHF   | CRP   | FruR  | Fis  | CRP   | FruR  | CRP  |     |
| b1674 | b1674 | CRP   | IHF   | NarL  | NarL  | FNR  | IHF   | IHF   | NarL |     |
| fepC  | b0588 | Fur   | CpxR  | NtrC  | Fur   | OxyR | FadR  | Fur   |      |     |
| fepE  | b0587 | HU    | Fur   | NarL  | PhoB  | Fur  | AllR  | Fur   |      |     |
| entF  | b0586 | Fur   | CRP   | FNR   | Fur   | CRP  | FNR   | Fur   | CRP  | FNR |
| ydhU  | b1670 | GntR  | FhlA  | NagC  | NagC  | SoxS | Rob   | NagC  |      |     |
| fes   | b0585 | Fur   | CRP   | FNR   | Fur   | CRP  | FNR   | Fur   | CRP  | FNR |
| fepA  | b0584 | Fur   | CRP   | IHF   | Fur   | CRP  | IHF   | Fur   | CRP  | IHF |
| entD  | b0583 | Fur   | ExuR  | CRP   | Fur   | CRP  | IHF   | Fur   | CRP  |     |
| fadB  | b3846 | FadR  | ArcA  | CRP   | FadR  | ArcA | Fis   | FadR  | ArcA |     |
| fadA  | b3845 | ArcA  | FadR  | Fis   | FadR  | Rob  | Fis   | FadR  | Fis  |     |
| ubiB  | b3844 | MarA  | TyrR  | NarL  | Fis   | NarL | Lrp   | NarL  |      |     |
| cysD  | b2752 | CysB  | IHF   | CRP   | CysB  | IHF  | H-NS  | CysB  | IHF  |     |
| b1668 | b1668 | NtrC  | H-NS  | MarA  | CpxR  | NtrC | RcsAB | NtrC  |      |     |
| cysN  | b2751 | CysB  | IHF   | CRP   | CysB  | IHF  | CRP   | CysB  | IHF  | CRP |
| b1667 | b1667 | CpxR  | Fis   | ArcA  | CRP   | FNR  | Fis   | Fis   |      |     |
| cysC  | b2750 | CysB  | IHF   | Lrp   | CysB  | IHF  | CRP   | CysB  | IHF  |     |
| b1664 | b1664 | CRP   | IHF   | FNR   | CRP   | FNR  | IHF   | CRP   | IHF  | FNR |
| ydhE  | b1663 | SoxS  | Rob   | NarL  | CpxR  | SoxS | Rob   | SoxS  | Rob  |     |
| nfnB  | b0578 | MarA  | CpxR  | Lrp   | MarA  | Fis  | CRP   | MarA  |      |     |
| cfa   | b1661 | FNR   | CRP   | H-NS  | CRP   | FNR  | IHF   | FNR   | CRP  |     |
| ybdE  | b0575 | CusR  | NagC  | FNR   | CusR  | Lrp  | CsgD  | CusR  |      |     |
| ylcD  | b0574 | CusR  | CRP   | Fis   | CusR  | FNR  | TrpR  | CusR  |      |     |
| ylcC  | b0573 | CusR  | IHF   | CRP   | CusR  | FNR  | CRP   | CusR  | CRP  |     |
| ylcB  | b0572 | CusR  | CRP   | IHF   | CusR  | FNR  | CRP   | CusR  | CRP  |     |
| ybcZ  | b0570 | CusR  | NagC  | Fur   | CusR  | BirA | CsgD  | CusR  |      |     |
| b3838 | b3838 | LexA  | H-NS  | Fis   | Fis   | ArgR | FNR   | Fis   |      |     |
| yigN  | b3832 | FNR   | CRP   | H-NS  | CRP   | FNR  | ArcA  | FNR   | CRP  |     |
| b2748 | b2748 | ArgR  | NtrC  | FihDC | LexA  | Fis  | FihDC | FihDC |      |     |
| udp   | b3831 | CytR  | CRP   | FNR   | CytR  | CRP  | FNR   | CytR  | CRP  | FNR |
| ysgA  | b3830 | FNR   | CRP   | Lrp   | Lrp   | IscR | FNR   | FNR   | Lrp  |     |
| surE  | b2744 | CusR  | ArgR  | MngR  | GntR  | PhoB | ArgR  | ArgR  |      |     |
| pcm   | b2743 | RcsAB | H-NS  | CpxR  | AcrR  | rpoH | RcsAB | RcsAB |      |     |
| nlpD  | b2742 | FruR  | CRP   | H-NS  | CRP   | IHF  | Fis   | CRP   |      |     |
| rpoS  | b2741 | GadX  | ArcA  | CRP   | GadX  | ArcA | CRP   | GadX  | ArcA | CRP |
| sodB  | b1656 | Fur   | H-NS  | IHF   | Fur   | H-NS | IHF   | Fur   | H-NS | IHF |
| ydhO  | b1655 | H-NS  | SoxS  | IHF   | SoxS  | PurR | Fur   | SoxS  |      |     |
| nfrB  | b0569 | Rob   | FihDC | NtrC  | FihDC | NarL | NtrC  | FihDC | NtrC |     |
| ompT  | b0565 | CRP   | IHF   | FNR   | CRP   | IHF  | H-NS  | CRP   | IHF  |     |
| appY  | b0564 | H-NS  | NarL  | NtrC  | H-NS  | CRP  | FNR   | H-NS  |      |     |
| ybcX  | b0561 | Fur   | CpxR  | FNR   | Fur   | CRP  | FNR   | Fur   | FNR  |     |
| metE  | b3829 | MetJ  | MetR  | CRP   | MetR  | MetJ | CRP   | MetJ  | MetR | CRP |
| metR  | b3828 | MetJ  | CsgD  | GadW  | MetR  | MetJ | PspF  | MetJ  |      |     |

|       |       |      |       |       |       |       |       |       |      |     |  |
|-------|-------|------|-------|-------|-------|-------|-------|-------|------|-----|--|
| ygbL  | b2738 | FucR | NikR  | GntR  | GntR  | Agar  | MtlR  | GntR  |      |     |  |
| pIdA  | b3821 | rpoH | MetJ  | H-NS  | ArgR  | rpoH  | FlhDC | rpoH  |      |     |  |
| ygbI  | b2735 | GutM | GutR  | CaiF  | HyfR  | CueR  | CaiF  | CaiF  |      |     |  |
| b1648 | b1648 | Zur  | NtrC  | FlhDC | ArgR  | FlhDC | rpoH  | FlhDC |      |     |  |
| fhIA  | b2731 | FhIA | NarL  | SoxS  | FhIA  | Agar  | NarL  | FhIA  | NarL |     |  |
| hypE  | b2730 | FhIA | YiaJ  | LsrR  | FhIA  | NarL  | IHF   | FhIA  |      |     |  |
| sodC  | b1646 | NtrC | Fis   | SoxS  | Lrp   | Fis   | CRP   | Fis   |      |     |  |
| b1645 | b1645 | CpxR | rpoH  | PhoP  | RcsAB | DgsA  | rpoH  | rpoH  |      |     |  |
| ybcU  | b0557 | PhoP | CRP   | IHF   | PhoP  | CRP   | IHF   | PhoP  | CRP  | IHF |  |
| slyB  | b1641 | PhoP | Fis   | NarL  | PhoP  | Fis   | FNR   | PhoP  | Fis  |     |  |
| nmpC  | b0553 | OmpR | CRP   | IHF   | OmpR  | IHF   | CRP   | OmpR  | CRP  | IHF |  |
| corA  | b3816 | PhoP | CRP   | FNR   | FruR  | PhoP  | FNR   | PhoP  | FNR  |     |  |
| uvrD  | b3813 | LexA | H-NS  | FlhDC | LexA  | TrpR  | NagC  | LexA  |      |     |  |
| hypD  | b2729 | FhIA | IHF   | IscR  | FhIA  | IHF   | FNR   | FhIA  | IHF  |     |  |
| hypC  | b2728 | FhIA | NarP  | OxyR  | FhIA  | IHF   | FNR   | FhIA  |      |     |  |
| hypB  | b2727 | FhIA | IscR  | NarP  | FhIA  | IHF   | FNR   | FhIA  |      |     |  |
| hypA  | b2726 | FhIA | NarP  | IscR  | FhIA  | IHF   | FNR   | FhIA  |      |     |  |
| hycA  | b2725 | FhIA | PaaX  | Zur   | FhIA  | ModE  | IHF   | FhIA  |      |     |  |
| hycC  | b2723 | FhIA | ModE  | NarL  | FhIA  | ModE  | IscR  | FhIA  | ModE |     |  |
| hycE  | b2721 | FhIA | ModE  | NarL  | FhIA  | ModE  | IHF   | FhIA  | ModE |     |  |
| tyrS  | b1637 | rpoH | FruR  | H-NS  | FruR  | Fis   | FNR   | FruR  |      |     |  |
| hycF  | b2720 | FhIA | UlaR  | RhaS  | FhIA  | ModE  | IHF   | FhIA  |      |     |  |
| gst   | b1635 | IHF  | Fis   | ArcA  | CRP   | IHF   | ArcA  | IHF   | ArcA |     |  |
| ydgR  | b1634 | OmpR | ArgR  | Lrp   | OmpR  | FNR   | CRP   | OmpR  |      |     |  |
| b1631 | b1631 | DeoR | OxyR  | rpoH  | rpoH  | Fis   | NarP  | rpoH  |      |     |  |
| ybcM  | b0546 | DicA | PhoB  | MalT  | CpxR  | PhoB  | rpoH  | PhoB  |      |     |  |
| cyaA  | b3806 | CpxR | CRP   | IscR  | CRP   | FNR   | CpxR  | CpxR  | CRP  |     |  |
| aslB  | b3800 | Rob  | Cbl   | GntR  | Rob   | LexA  | H-NS  | Rob   |      |     |  |
| ascB  | b2716 | AscG | CytR  | HyfR  | HyfR  | GntR  | FhIA  | HyfR  |      |     |  |
| hypF  | b2712 | FhIA | NarL  | LsrR  | HyfR  | TyrR  | FhIA  | FhIA  |      |     |  |
| b1627 | b1627 | PurR | PhoB  | CpxR  | Fis   | CpxR  | FNR   | CpxR  |      |     |  |
| b1626 | b1626 | NtrC | FNR   | IHF   | FNR   | Fis   | IHF   | FNR   | IHF  |     |  |
| add   | b1623 | Fis  | FNR   | CRP   | CRP   | FNR   | IHF   | FNR   | CRP  |     |  |
| srlD  | b2705 | GutM | GutR  | CRP   | GutM  | GutR  | CRP   | GutM  | GutR | CRP |  |
| srlB  | b2704 | PhoB | GutM  | GutR  | GutM  | GutR  | CRP   | GutM  | GutR |     |  |
| srlE  | b2703 | GutM | GutR  | CRP   | GutM  | GutR  | CRP   | GutM  | GutR | CRP |  |
| srlA  | b2702 | GutM | GutR  | CRP   | GutM  | GutR  | CRP   | GutM  | GutR | CRP |  |
| uidA  | b1617 | UidR | UxuR  | CRP   | UxuR  | FlhDC | MarA  | UxuR  |      |     |  |
| uidC  | b1615 | UidR | UxuR  | CRP   | UxuR  | SoxS  | Rob   | UxuR  |      |     |  |
| ydgA  | b1614 | Fis  | rpoH  | FNR   | PhoP  | Fis   | IHF   | Fis   |      |     |  |
| fold  | b0529 | Fur  | CpxR  | CRP   | ArgR  | CpxR  | Fis   | CpxR  |      |     |  |
| manA  | b1613 | Rob  | SoxS  | MarA  | rpoH  | FruR  | SoxS  | SoxS  |      |     |  |
| fumA  | b1612 | ArcA | FNR   | CRP   | ArcA  | FNR   | CRP   | ArcA  | FNR  | CRP |  |
| tus   | b1610 | Fis  | CpxR  | IHF   | SoxS  | FlhDC | CpxR  | CpxR  |      |     |  |
| ppiB  | b0525 | Fis  | CpxR  | FNR   | Fis   | rpoH  | CRP   | Fis   |      |     |  |
| purE  | b0523 | PurR | PhoP  | H-NS  | PurR  | PhoP  | Lrp   | PurR  | PhoP |     |  |
| purK  | b0522 | PurR | PhoP  | CRP   | PurR  | Lrp   | Nac   | PurR  |      |     |  |
| rstB  | b1609 | PhoP | rpoH  | H-NS  | PhoP  | FNR   | Fis   | PhoP  |      |     |  |
| rstA  | b1608 | PhoP | Lrp   | IHF   | PhoP  | FNR   | IHF   | PhoP  | IHF  |     |  |
| ydgB  | b1606 | PurR | FruR  | NarL  | SoxS  | NarL  | rpoH  | NarL  |      |     |  |
| b1605 | b1605 | rpoH | MalT  | FruR  | PurR  | PhoP  | rpoH  | rpoH  |      |     |  |
| b1604 | b1604 | CpxR | H-NS  | FNR   | CpxR  | NtrC  | PhoP  | CpxR  |      |     |  |
| pntA  | b1603 | Lrp  | OmpR  | CRP   | CRP   | Lrp   | IHF   | Lrp   | CRP  |     |  |
| fdrA  | b0518 | Agar | MngR  | AllR  | AllR  | PhoB  | NarP  | AllR  |      |     |  |
| pntB  | b1602 | OmpR | Lrp   | CRP   | CRP   | Lrp   | IHF   | Lrp   | CRP  |     |  |
| b1601 | b1601 | CpxR | FlhDC | RcsAB | SoxS  | FlhDC | YiaJ  | FlhDC |      |     |  |
| ybbZ  | b0514 | AllR | DhaR  | LexA  | AllR  | PhoB  | HyfR  | AllR  |      |     |  |
| ybbY  | b0513 | AllR | AtoC  | PdhR  | AllR  | FlhDC | RcsAB | AllR  |      |     |  |
| ybbX  | b0512 | AllR | GntR  | FucR  | AllR  | rpoH  | IHF   | AllR  |      |     |  |

|       |       |      |       |       |      |       |       |      |      |     |  |
|-------|-------|------|-------|-------|------|-------|-------|------|------|-----|--|
| ybbW  | b0511 | AllR | NarL  | FruR  | AllR | ArgR  | rpoH  | AllR |      |     |  |
| ybbQ  | b0509 | AllR | MngR  | PdhR  | AllR | PhoB  | MprA  | AllR |      |     |  |
| hyi   | b0508 | AllR | Fis   | FruR  | AllR | NagC  | EvgA  | AllR |      |     |  |
| gcl   | b0507 | AllR | FhlA  | NarP  | AllR | NagC  | NtrC  | AllR |      |     |  |
| ybbU  | b0506 | AraC | Lrp   | ArgR  | Lrp  | rpoH  | H-NS  | Lrp  |      |     |  |
| ybbS  | b0504 | AllR | TdcA  | TdcR  | AcrR | AllR  | GntR  | AllR |      |     |  |
| fecl  | b4293 | Fur  | CRP   | FNR   | Fur  | CRP   | IHF   | Fur  | CRP  |     |  |
| fecR  | b4292 | Fur  | H-NS  | CRP   | Fur  | CRP   | IHF   | Fur  | CRP  |     |  |
| fecA  | b4291 | Fur  | CRP   | IHF   | Fur  | CRP   | H-NS  | Fur  | CRP  |     |  |
| fecB  | b4290 | Fur  | CRP   | IHF   | Fur  | CRP   | FNR   | Fur  | CRP  |     |  |
| fecC  | b4289 | Fur  | CRP   | IHF   | Fur  | CRP   | H-NS  | Fur  | CRP  |     |  |
| fecD  | b4288 | Fur  | PhoB  | CysB  | Fur  | CRP   | FNR   | Fur  |      |     |  |
| fecE  | b4287 | Fur  | CRP   | FNR   | Fur  | CRP   | FNR   | Fur  | CRP  | FNR |  |
| yrbI  | b3198 | CpxR | H-NS  | Fis   | rpoH | CpxR  | SoxS  | CpxR |      |     |  |
| yrbB  | b3191 | TyrR | IscR  | rpoH  | rpoH | LexA  | PurR  | rpoH |      |     |  |
| yrbA  | b3190 | Nac  | Fis   | FruR  | Fis  | CRP   | CpxR  | Fis  |      |     |  |
| yjhB  | b4279 | CRP  | Lrp   | Fur   | CRP  | FNR   | FihDC | CRP  |      |     |  |
| yjgX  | b4275 | CpxR | Nac   | Fis   | CpxR | Fis   | rpoH  | CpxR | Fis  |     |  |
| murA  | b3189 | IHF  | CRP   | FNR   | CpxR | Fis   | FNR   | FNR  |      |     |  |
| ispB  | b3187 | NagC | FruR  | LexA  | CpxR | ArgR  | NagC  | NagC |      |     |  |
| rplU  | b3186 | FNR  | Fis   | ArcA  | Fis  | FNR   | CRP   | FNR  | Fis  |     |  |
| rpmA  | b3185 | FNR  | Fis   | ArcA  | FNR  | Fis   | IHF   | FNR  | Fis  |     |  |
| yhbE  | b3184 | PurR | Fis   | IHF   | Fis  | CRP   | ArcA  | Fis  |      |     |  |
| yhbZ  | b3183 | Fis  | IHF   | FNR   | Fis  | CRP   | ArcA  | Fis  |      |     |  |
| greA  | b3181 | Fis  | PhoP  | FNR   | Fis  | IHF   | FNR   | Fis  | FNR  |     |  |
| gatY  | b2096 | ArcA | CRP   | IHF   | ArcA | CRP   | FNR   | ArcA | CRP  |     |  |
| gatZ  | b2095 | ArcA | CRP   | FNR   | ArcA | CRP   | FNR   | ArcA | CRP  | FNR |  |
| gatA  | b2094 | ArcA | CRP   | FNR   | ArcA | CRP   | FNR   | ArcA | CRP  | FNR |  |
| gatB  | b2093 | ArcA | CRP   | FNR   | ArcA | CRP   | FNR   | ArcA | CRP  | FNR |  |
| gatC  | b2092 | ArcA | CRP   | FNR   | ArcA | CRP   | FNR   | ArcA | CRP  | FNR |  |
| gatD  | b2091 | ArcA | CRP   | FNR   | ArcA | CRP   | FNR   | ArcA | CRP  | FNR |  |
| yjgB  | b4269 | SoxS | MarA  | NarL  | SoxS | MarA  | OxyR  | SoxS | MarA |     |  |
| idnK  | b4268 | GntR | RcsAB | DgsA  | GntR | IdnR  | YiaJ  | GntR |      |     |  |
| idnD  | b4267 | GntR | IdnR  | XylR  | GntR | IdnR  | NagC  | GntR | IdnR |     |  |
| idnO  | b4266 | GntR | CusR  | RhaS  | GntR | IdnR  | NagC  | GntR |      |     |  |
| idnR  | b4264 | GntR | IdnR  | DeoR  | GntR | IdnR  | FhlA  | GntR | IdnR |     |  |
| ftsJ  | b3179 | rpoH | IHF   | CRP   | rpoH | CpxR  | CRP   | rpoH | CRP  |     |  |
| hflB  | b3178 | rpoH | RcsAB | GadX  | rpoH | CpxR  | IHF   | rpoH |      |     |  |
| yjgP  | b4261 | CpxR | NanR  | LexA  | CpxR | Fis   | ArgR  | CpxR |      |     |  |
| secG  | b3175 | Fis  | ArgR  | IHF   | Fis  | CRP   | FNR   | Fis  |      |     |  |
| argG  | b3172 | ArgR | CRP   | IHF   | ArgR | CRP   | IHF   | ArgR | CRP  | IHF |  |
| yhbC  | b3170 | ArgR | Fis   | CRP   | ArgR | Fis   | CRP   | ArgR | Fis  | CRP |  |
| yegQ  | b2081 | CRP  | Fis   | IHF   | Fis  | Fur   | FNR   | Fis  |      |     |  |
| b2080 | b2080 | H-NS | GadE  | FNR   | H-NS | CRP   | IHF   | H-NS |      |     |  |
| valS  | b4258 | CpxR | H-NS  | FNR   | rpoH | CpxR  | IHF   | CpxR |      |     |  |
| argI  | b4254 | ArgR | PhoP  | CRP   | ArgR | CRP   | IHF   | ArgR | CRP  |     |  |
| nusA  | b3169 | ArgR | Fis   | CRP   | ArgR | Fis   | FNR   | ArgR | Fis  |     |  |
| infB  | b3168 | ArgR | Fis   | FNR   | ArgR | Fis   | CRP   | ArgR | Fis  |     |  |
| rbfA  | b3167 | ArgR | ModE  | Fis   | ArgR | Fis   | CRP   | ArgR | Fis  |     |  |
| truB  | b3166 | ArgR | Fis   | FNR   | ArgR | Fis   | CRP   | ArgR | Fis  |     |  |
| rpsO  | b3165 | ArgR | Fis   | CRP   | ArgR | Fis   | FNR   | ArgR | Fis  |     |  |
| pnp   | b3164 | ArgR | Fis   | CRP   | ArgR | Fis   | CRP   | ArgR | Fis  | CRP |  |
| npl   | b3163 | H-NS | FNR   | IHF   | Fis  | CRP   | FNR   | FNR  |      |     |  |
| deaD  | b3162 | FNR  | IHF   | Fis   | Fis  | CRP   | FNR   | FNR  | Fis  |     |  |
| yegB  | b2077 | BaeR | FhlA  | NikR  | NagC | BaeR  | CpxR  | BaeR |      |     |  |
| yhbW  | b3160 | TrpR | IHF   | FihDC | SoxS | MarA  | IHF   | IHF  |      |     |  |
| b2074 | b2074 | BaeR | CpxR  | PhoB  | BaeR | CpxR  | FihDC | BaeR | CpxR |     |  |
| b2072 | b2072 | Cbl  | Rob   | GntR  | NagC | TrpR  | Rob   | Rob  |      |     |  |
| yjgH  | b4248 | Cbl  | PhoB  | GadW  | PhoB | RcsAB | ArcA  | PhoB |      |     |  |

|       |       |        |       |       |       |        |        |       |      |      |     |
|-------|-------|--------|-------|-------|-------|--------|--------|-------|------|------|-----|
| pyrB  | b4245 | IHF    | FNR   | ArgR  | IHF   | PurR   | FNR    | IHF   | FNR  |      |     |
| pyrI  | b4244 | PurR   | CRP   | IHF   | IHF   | FNR    | PurR   | PurR  | IHF  |      |     |
| yjgF  | b4243 | CRP    | FNR   | IHF   | FNR   | IHF    | CRP    | CRP   | FNR  | IHF  |     |
| mgtA  | b4242 | PhoP   | CRP   | FNR   | PhoP  | CRP    | FNR    | PhoP  | CRP  | FNR  | IHF |
| treR  | b4241 | PhoP   | HcaR  | PhoB  | PhoP  | DeoR   | NsrR   | PhoP  |      |      |     |
| treB  | b4240 | ArcA   | CRP   | Fis   | ArcA  | CRP    | IHF    | ArcA  | CRP  |      |     |
| yhbO  | b3153 | NtrC   | MarA  | SoxS  | SoxS  | Lrp    | MarA   | MarA  | SoxS |      |     |
| yegD  | b2069 | FadR   | Fis   | FNR   | PurR  | FadR   | PhoB   | FadR  |      |      |     |
| yraP  | b3150 | FliHDC | CpxR  | RcsAB | CpxR  | Fis    | Fur    | CpxR  |      |      |     |
| udk   | b2066 | SoxS   | FNR   | Fis   | FNR   | PurR   | SoxS   | SoxS  | FNR  |      |     |
| wza   | b2062 | Cbl    | RcsAB | AllR  | RcsAB | FliHDC | CpxR   | RcsAB |      |      |     |
| treC  | b4239 | ArcA   | CRP   | IHF   | ArcA  | CRP    | IHF    | ArcA  | CRP  | IHF  |     |
| nrdD  | b4238 | FNR    | Fis   | NtrC  | FNR   | CRP    | IHF    | FNR   |      |      |     |
| yjgG  | b4233 | LexA   | CRP   | NarL  | AgaR  | SoxS   | LexA   | LexA  |      |      |     |
| yraO  | b3149 | CpxR   | MarA  | ArgR  | CpxR  | PhoP   | H-NS   | CpxR  |      |      |     |
| ytfT  | b4230 | FliHDC | GntR  | Fur   | GntR  | NagC   | PhoB   | GntR  |      |      |     |
| wcaB  | b2058 | RcsAB  | HyfR  | AgaR  | RcsAB | FliHDC | rpoH   | RcsAB |      |      |     |
| agal  | b3141 | AgaR   | Cbl   | CusR  | AgaR  | RcsAB  | NagC   | AgaR  |      |      |     |
| agaD  | b3140 | AgaR   | Cbl   | CsgD  | AgaR  | YiaJ   | NagC   | AgaR  |      |      |     |
| ytfR  | b4228 | CRP    | Fis   | NarL  | PhoB  | NtrC   | Fis    | Fis   |      |      |     |
| ytfQ  | b4227 | CRP    | Fis   | FNR   | CRP   | Fis    | IHF    | CRP   | Fis  |      |     |
| ppa   | b4226 | Fis    | CRP   | CpxR  | CRP   | CRP    | FNR    | Fis   | CRP  |      |     |
| ytfN  | b4221 | rpoH   | NagC  | CpxR  | CpxR  | PhoP   | ArgR   | CpxR  |      |      |     |
| agaS  | b3136 | AgaR   | TdcA  | TdcR  | AgaR  | NagC   | Rob    | AgaR  |      |      |     |
| agaA  | b3135 | AgaR   | RcsAB | FliA  | AgaR  | AllR   | EvgA   | AgaR  |      |      |     |
| agaW  | b3134 | AgaR   | NtrC  | NarP  | EvgA  | AgaR   | DeoR   | AgaR  |      |      |     |
| agaV  | b3133 | AgaR   | TrpR  | PhoP  | AgaR  | Rob    | NagC   | AgaR  |      |      |     |
| agaZ  | b3132 | AgaR   | ExuR  | AraC  | AgaR  | HyfR   | CdaR   | AgaR  |      |      |     |
| agaR  | b3131 | AgaR   | RbsR  | ExuR  | AgaR  | CpxR   | FliHDC | AgaR  |      |      |     |
| yhaV  | b3130 | OxyR   | PhoP  | AgaR  | AgaR  | PhoP   | CRP    | PhoP  |      |      |     |
| galF  | b2042 | H-NS   | Fis   | LexA  | LexA  | Lrp    | CRP    | LexA  |      |      |     |
| rfbB  | b2041 | H-NS   | Fis   | FNR   | IHF   | CRP    | FNR    | FNR   |      |      |     |
| rfbD  | b2040 | Fis    | SoxS  | IHF   | rpoH  | CRP    | IHF    | IHF   |      |      |     |
| ytfK  | b4217 | H-NS   | OmpR  | FNR   | CRP   | FNR    | ArcA   | FNR   |      |      |     |
| sohA  | b3129 | Fis    | CpxR  | IHF   | Fis   | FNR    | CRP    | Fis   |      |      |     |
| yhaG  | b3128 | CdaR   | FNR   | CRP   | CdaR  | FNR    | CRP    | CdaR  | FNR  | CRP  |     |
| yhaU  | b3127 | CdaR   | CRP   | FNR   | CdaR  | FNR    | CRP    | CdaR  | CRP  | FNR  |     |
| yhaF  | b3126 | CdaR   | FNR   | CRP   | CdaR  | FNR    | CRP    | CdaR  | FNR  | CRP  |     |
| yhaE  | b3125 | CdaR   | FNR   | CRP   | CdaR  | FNR    | CRP    | CdaR  | FNR  | CRP  |     |
| yhaD  | b3124 | CdaR   | FNR   | CRP   | CdaR  | FNR    | FliHDC | CdaR  | FNR  |      |     |
| rfbA  | b2039 | FNR    | H-NS  | CRP   | IHF   | CRP    | FNR    | FNR   | CRP  |      |     |
| rpII  | b4203 | FNR    | CpxR  | ArcA  | Fis   | FNR    | CRP    | FNR   |      |      |     |
| rpsR  | b4202 | FNR    | ArcA  | Fis   | FNR   | ArcA   | Fis    | FNR   | ArcA | Fis  |     |
| priB  | b4201 | FNR    | ArcA  | Fis   | FNR   | ArcA   | Fis    | FNR   | ArcA | Fis  |     |
| tdcB  | b3117 | TdcA   | TdcR  | CpxR  | TdcA  | TdcR   | IHF    | TdcA  | TdcR |      |     |
| rpsF  | b4200 | FNR    | Fis   | ArcA  | FNR   | ArcA   | Fis    | FNR   | Fis  | ArcA |     |
| gnd   | b2029 | GadE   | Fis   | IHF   | GadE  | rpoH   | Lrp    | GadE  |      |      |     |
| wzzB  | b2027 | CRP    | IHF   | H-NS  | Fis   | CRP    | FNR    | CRP   |      |      |     |
| hisI  | b2026 | IHF    | CRP   | Lrp   | TrpR  | Lrp    | CRP    | CRP   | Lrp  |      |     |
| hisF  | b2025 | Lrp    | IHF   | ArgR  | IHF   | CRP    | Lrp    | Lrp   | IHF  |      |     |
| hisA  | b2024 | ArgR   | IHF   | Lrp   | Nac   | IHF    | Lrp    | IHF   | Lrp  |      |     |
| hisH  | b2023 | IHF    | Lrp   | ArgR  | IHF   | CRP    | FNR    | IHF   |      |      |     |
| hisB  | b2022 | IHF    | CRP   | Lrp   | CRP   | IHF    | FNR    | IHF   | CRP  |      |     |
| hisC  | b2021 | IHF    | CRP   | ArgR  | CRP   | IHF    | FNR    | IHF   | CRP  |      |     |
| hisD  | b2020 | IHF    | CRP   | FNR   | IHF   | CRP    | FNR    | IHF   | CRP  | FNR  |     |
| hisG  | b2019 | CRP    | IHF   | Lrp   | CRP   | IHF    | FNR    | CRP   | IHF  |      |     |
| b2016 | b2016 | Fur    | CpxR  | OxyR  | Fis   | CpxR   | PhoB   | CpxR  |      |      |     |
| yeeY  | b2015 | Fur    | CpxR  | H-NS  | rpoH  | CpxR   | FruR   | CpxR  |      |      |     |
| yeeF  | b2014 | FNR    | CRP   | IHF   | CRP   | Fis    | ArcA   | CRP   |      |      |     |

|        |       |        |       |        |        |        |        |        |      |      |  |
|--------|-------|--------|-------|--------|--------|--------|--------|--------|------|------|--|
| yeeE   | b2013 | CysB   | IHF   | CRP    | IHF    | CRP    | H-NS   | IHF    | CRP  |      |  |
| yeeD   | b2012 | CysB   | IHF   | CRP    | IHF    | CRP    | ArcA   | IHF    | CRP  |      |  |
| sbmC   | b2009 | CRP    | FNR   | ArcA   | CRP    | ArcA   | FNR    | CRP    | FNR  | ArcA |  |
| yeeA   | b2008 | NanR   | LexA  | LrhA   | LexA   | CRP    | H-NS   | LexA   |      |      |  |
| yeeX   | b2007 | Fis    | rpoH  | PhoB   | Fis    | CRP    | ArcA   | Fis    |      |      |  |
| b2001  | b2001 | OxyR   | GadE  | GadX   | OxyR   | NarL   | ArcA   | OxyR   |      |      |  |
| flu    | b2000 | OxyR   | FNR   | FruR   | OxyR   | NarL   | ArcA   | OxyR   |      |      |  |
| wecF   | b3793 | FliHDC | NtrC  | rpoH   | FliHDC | ArgR   | NtrC   | FliHDC | NtrC |      |  |
| rffG   | b3788 | Lrp    | Fis   | CpxR   | Fis    | FliHDC | CpxR   | Fis    | CpxR |      |  |
| wecC   | b3787 | Lrp    | CpxR  | FliHDC | rpoH   | H-NS   | CpxR   | CpxR   |      |      |  |
| rfe    | b3784 | CytR   | H-NS  | NhaR   | Fis    | FliHDC | H-NS   | H-NS   |      |      |  |
| rho    | b3783 | ArcA   | CpxR  | CRP    | Fis    | CRP    | CpxR   | CpxR   | CRP  |      |  |
| recA   | b2699 | LexA   | ArcA  | IHF    | LexA   | CRP    | ArcA   | LexA   | ArcA |      |  |
| oraA   | b2698 | LexA   | CpxR  | IHF    | LexA   | CRP    | ArcA   | LexA   |      |      |  |
| alaS   | b2697 | FNR    | GadE  | FruR   | Fis    | IHF    | FNR    | FNR    |      |      |  |
| rhlB   | b3780 | RcsAB  | LexA  | CpxR   | CpxR   | ArgR   | FNR    | CpxR   |      |      |  |
| ilvC   | b3774 | CRP    | Lrp   | IHF    | CRP    | IHF    | Lrp    | CRP    | Lrp  | IHF  |  |
| ilvA   | b3772 | Lrp    | IHF   | Fur    | Lrp    | IHF    | FNR    | Lrp    | IHF  |      |  |
| gshA   | b2688 | FruR   | H-NS  | CpxR   | H-NS   | Fis    | FNR    | H-NS   |      |      |  |
| ilvD   | b3771 | Lrp    | IHF   | CRP    | Lrp    | IHF    | FNR    | Lrp    | IHF  |      |  |
| ygaG   | b2687 | OxyR   | Fis   | NarL   | FruR   | CpxR   | Fis    | Fis    |      |      |  |
| ilvE   | b3770 | Lrp    | IHF   | Fur    | Lrp    | IHF    | FNR    | Lrp    | IHF  |      |  |
| emrR   | b2684 | FNR    | FruR  | IHF    | MprA   | CRP    | FNR    | FNR    |      |      |  |
| b1599  | b1599 | NtrC   | H-NS  | Fis    | Fis    | IHF    | CRP    | Fis    |      |      |  |
| b1598  | b1598 | PhoP   | CpxR  | PhoB   | PhoB   | SoxS   | ArgR   | PhoB   |      |      |  |
| asr    | b1597 | PhoB   | CRP   | ArcA   | PhoB   | CRP    | IHF    | PhoB   | CRP  |      |  |
| mlc    | b1594 | DgsA   | TorR  | AraC   | DgsA   | CRP    | IHF    | DgsA   |      |      |  |
| b1593  | b1593 | NarL   | IscR  | NikR   | FNR    | NarL   | IHF    | NarL   |      |      |  |
| b1592  | b1592 | NarL   | RcsAB | FliA   | SoxS   | RcsAB  | FliHDC | RcsAB  |      |      |  |
| b1590  | b1590 | FNR    | NikR  | Zur    | FNR    | NarL   | IHF    | FNR    |      |      |  |
| ilvM   | b3769 | Lrp    | IHF   | Fur    | Lrp    | IHF    | CRP    | Lrp    | IHF  |      |  |
| ilvG_1 | b3767 | Lrp    | IHF   | CRP    | Lrp    | IHF    | CRP    | Lrp    | IHF  | CRP  |  |
| ilvL   | b3766 | CusR   | Lrp   | LexA   | Lrp    | IHF    | CRP    | Lrp    |      |      |  |
| proX   | b2679 | H-NS   | FNR   | ArcA   | H-NS   | CRP    | IHF    | H-NS   |      |      |  |
| proW   | b2678 | H-NS   | CRP   | ArcA   | H-NS   | CRP    | Fis    | H-NS   | CRP  |      |  |
| proV   | b2677 | H-NS   | Fis   | CRP    | H-NS   | CRP    | ArcA   | H-NS   | CRP  |      |  |
| nrdF   | b2676 | Fur    | IHF   | CRP    | Fur    | CRP    | IHF    | Fur    | IHF  | CRP  |  |
| nrdE   | b2675 | Fur    | CRP   | FNR    | Fur    | CRP    | IHF    | Fur    | CRP  |      |  |
| nrdI   | b2674 | Fur    | FNR   | IHF    | Fur    | CRP    | IHF    | Fur    | IHF  |      |  |
| nrdH   | b2673 | Fur    | FNR   | IHF    | Fur    | CRP    | IHF    | Fur    | IHF  |      |  |
| b1589  | b1589 | NarL   | NarP  | IscR   | FNR    | NarL   | IHF    | NarL   |      |      |  |
| ygaM   | b2672 | IHF    | H-NS  | Lrp    | CRP    | IHF    | Fis    | IHF    |      |      |  |
| b1588  | b1588 | FNR    | Fur   | NarL   | FNR    | NarL   | IHF    | FNR    | NarL |      |  |
| ygaC   | b2671 | Fur    | CpxR  | IHF    | Fur    | RcsAB  | NagC   | Fur    |      |      |  |
| b2670  | b2670 | CpxR   | Fur   | IHF    | IHF    | FNR    | CRP    | IHF    |      |      |  |
| b1586  | b1586 | OmpR   | PhoB  | NtrC   | NtrC   | Fis    | PhoB   | PhoB   | NtrC |      |  |
| b0499  | b0499 | FliHDC | CpxR  | rpoH   | PhoB   | CpxR   | NarL   | CpxR   |      |      |  |
| b1583  | b1583 | FruR   | FNR   | CRP    | PhoP   | FNR    | CRP    | FNR    | CRP  |      |  |
| ybbN   | b0492 | rpoH   | GadX  | Rob    | rpoH   | CRP    | IHF    | rpoH   |      |      |  |
| yieO   | b3754 | RcsAB  | rpoH  | MarA   | rpoH   | FruR   | CpxR   | rpoH   |      |      |  |
| rbsB   | b3751 | RbsR   | CRP   | FNR    | CRP    | FNR    | IHF    | CRP    | FNR  |      |  |
| rbsC   | b3750 | RbsR   | IHF   | FNR    | CRP    | RbsR   | FNR    | RbsR   | FNR  |      |  |
| gabP   | b2663 | Nac    | GadE  | NhaR   | Nac    | Lrp    | H-NS   | Nac    |      |      |  |
| b1579  | b1579 | DicA   | Fur   | CpxR   | RcsAB  | LexA   | CpxR   | CpxR   |      |      |  |
| gabT   | b2662 | Nac    | H-NS  | Lrp    | Nac    | Lrp    | H-NS   | Nac    | H-NS | Lrp  |  |
| gabD   | b2661 | Nac    | Lrp   | H-NS   | Nac    | Lrp    | H-NS   | Nac    | Lrp  | H-NS |  |
| ygaF   | b2660 | Lrp    | NtrC  | H-NS   | Lrp    | H-NS   | CRP    | Lrp    | H-NS |      |  |
| ybaT   | b0486 | GadX   | MarA  | H-NS   | GadX   | Lrp    | H-NS   | GadX   | H-NS |      |  |
| ybaS   | b0485 | GadX   | H-NS  | MarA   | GadX   | H-NS   | ArcA   | GadX   | H-NS |      |  |

|       |       |       |       |       |       |      |       |       |      |      |  |
|-------|-------|-------|-------|-------|-------|------|-------|-------|------|------|--|
| ybaQ  | b0483 | CpxR  | Fur   | LexA  | CpxR  | CRP  | IHF   | CpxR  |      |      |  |
| ybaP  | b0482 | Fur   | SoxS  | LexA  | SoxS  | Cbl  | CpxR  | SoxS  |      |      |  |
| ushA  | b0480 | FadR  | CueR  | FNR   | FadR  | PurR | rpoH  | FadR  |      |      |  |
| rbsA  | b3749 | RbsR  | CRP   | Fis   | CRP   | RbsR | ArcA  | RbsR  | CRP  |      |  |
| asnC  | b3743 | Nac   | AsnC  | PhoB  | Nac   | AsnC | CpxR  | Nac   | AsnC |      |  |
| b2659 | b2659 | Lrp   | CsiR  | H-NS  | Lrp   | H-NS | CRP   | Lrp   | H-NS |      |  |
| mioC  | b3742 | Nac   | AsnC  | CRP   | Nac   | AsnC | CRP   | Nac   | AsnC | CRP  |  |
| gidA  | b3741 | Nac   | AsnC  | Fis   | Nac   | AsnC | Fis   | Nac   | AsnC | Fis  |  |
| flxA  | b1566 | FlhDC | H-NS  | GadE  | FlhDC | CpxR | H-NS  | FlhDC | H-NS |      |  |
| gsk   | b0477 | PurR  | rpoH  | H-NS  | rpoH  | Fis  | SoxS  | rpoH  |      |      |  |
| hemH  | b0475 | OxyR  | MetR  | IclR  | OxyR  | MetJ | rpoH  | OxyR  |      |      |  |
| adk   | b0474 | CRP   | FNR   | Fis   | CRP   | FNR  | IHF   | CRP   | FNR  |      |  |
| htpG  | b0473 | rpoH  | CRP   | IHF   | rpoH  | CRP  | IHF   | rpoH  | CRP  | IHF  |  |
| recR  | b0472 | CytR  | DeoR  | CpxR  | SoxS  | CpxR | Fis   | CpxR  |      |      |  |
| dnaX  | b0470 | Fis   | GadE  | FNR   | Fis   | CpxR | SoxS  | Fis   |      |      |  |
| atpI  | b3739 | FlhDC | CpxR  | Fis   | CRP   | FNR  | CpxR  | CpxR  |      |      |  |
| atpB  | b3738 | FNR   | Fis   | CRP   | FNR   | CRP  | IHF   | FNR   | CRP  |      |  |
| atpF  | b3736 | FNR   | Fis   | ArcA  | IHF   | FNR  | Fis   | FNR   | Fis  |      |  |
| atpH  | b3735 | CRP   | IHF   | FNR   | FNR   | Fis  | CRP   | CRP   | FNR  |      |  |
| atpA  | b3734 | FNR   | ArcA  | CRP   | FNR   | IHF  | CRP   | FNR   | CRP  |      |  |
| atpG  | b3733 | FNR   | ArcA  | Fis   | FNR   | Fis  | IHF   | FNR   | Fis  |      |  |
| atpD  | b3732 | FNR   | Fis   | ArcA  | FNR   | CRP  | IHF   | FNR   |      |      |  |
| glmU  | b3730 | NagC  | CpxR  | CRP   | NagC  | FNR  | IHF   | NagC  |      |      |  |
| b1556 | b1556 | GntR  | NarL  | FlhDC | FlhDC | CpxR | NagC  | FlhDC |      |      |  |
| apt   | b0469 | FNR   | Fis   | ArcA  | Fis   | CRP  | IHF   | Fis   |      |      |  |
| priC  | b0467 | ZraR  | MtlR  | Cbl   | Cbl   | LsrR | AgaR  | Cbl   |      |      |  |
| acrB  | b0462 | Rob   | MarA  | SoxS  | Rob   | SoxS | PhoP  | Rob   | SoxS |      |  |
| ybaJ  | b0461 | CpxR  | FadR  | Fis   | CpxR  | FNR  | CRP   | CpxR  |      |      |  |
| hha   | b0460 | CpxR  | Fur   | PhoB  | CpxR  | FNR  | CRP   | CpxR  |      |      |  |
| glmS  | b3729 | NagC  | CRP   | Fis   | NagC  | FNR  | CRP   | NagC  | CRP  |      |  |
| pstS  | b3728 | PhoB  | IHF   | FNR   | PhoB  | IHF  | FNR   | PhoB  | IHF  | FNR  |  |
| pstC  | b3727 | PhoB  | IHF   | FNR   | PhoB  | IHF  | FNR   | PhoB  | IHF  | FNR  |  |
| pstA  | b3726 | PhoB  | IHF   | FNR   | PhoB  | IHF  | FNR   | PhoB  | IHF  | FNR  |  |
| pstB  | b3725 | PhoB  | IHF   | FNR   | PhoB  | IHF  | FNR   | PhoB  | IHF  | FNR  |  |
| phoU  | b3724 | PhoB  | UxuR  | HcaR  | PhoB  | IHF  | FNR   | PhoB  |      |      |  |
| ydfM  | b1546 | Fur   | H-NS  | CpxR  | Fur   | CRP  | FNR   | Fur   |      |      |  |
| ylaC  | b0458 | IHF   | CRP   | ArcA  | CRP   | ArcA | FNR   | CRP   | ArcA |      |  |
| ylaB  | b0457 | CytR  | CpxR  | H-NS  | PhoB  | CpxR | NtrC  | CpxR  |      |      |  |
| b1541 | b1541 | NarL  | IHF   | ArcA  | FNR   | ArcA | CRP   | ArcA  |      |      |  |
| ybaY  | b0453 | IHF   | CRP   | Fis   | Lrp   | IHF  | Fis   | IHF   | Fis  |      |  |
| tesB  | b0452 | HU    | PhoB  | HcaR  | CueR  | PhoB | Cbl   | PhoB  |      |      |  |
| glnK  | b0450 | NtrC  | GadX  | IHF   | NtrC  | GadX | Nac   | NtrC  | GadX |      |  |
| yieE  | b3712 | CpxR  | H-NS  | FNR   | CpxR  | CRP  | rpoH  | CpxR  |      |      |  |
| ydeH  | b1535 | CpxR  | LrhA  | NhaR  | CpxR  | CRP  | FNR   | CpxR  |      |      |  |
| marA  | b1531 | Rob   | MarA  | SoxS  | Rob   | SoxS | MarA  | Rob   | MarA | SoxS |  |
| marR  | b1530 | Rob   | MarA  | SoxS  | Rob   | SoxS | MarA  | Rob   | MarA | SoxS |  |
| ybaU  | b0441 | rpoH  | CpxR  | HU    | rpoH  | CpxR | RcsAB | rpoH  | CpxR |      |  |
| tnaB  | b3709 | TorR  | FlhDC | H-NS  | TorR  | CRP  | ArcA  | TorR  |      |      |  |
| tnaA  | b3708 | TorR  | CRP   | ArcA  | TorR  | CRP  | IHF   | TorR  | CRP  |      |  |
| tnaL  | b3707 | TorR  | CRP   | Fis   | TorR  | CRP  | IHF   | TorR  | CRP  |      |  |
| thdF  | b3706 | rpoH  | GntR  | NarL  | rpoH  | NagC | PhoB  | rpoH  |      |      |  |
| rnpA  | b3704 | Fis   | FNR   | CRP   | Fis   | CRP  | FNR   | Fis   | FNR  | CRP  |  |
| rpmH  | b3703 | LexA  | FNR   | Fis   | Fis   | FNR  | CRP   | FNR   | Fis  |      |  |
| dnaA  | b3702 | DnaA  | Fis   | LexA  | rpoH  | Fis  | LexA  | Fis   | LexA |      |  |
| dnaN  | b3701 | DnaA  | LexA  | CpxR  | Fis   | DnaA | CRP   | DnaA  |      |      |  |
| recN  | b2616 | LexA  | IHF   | ArcA  | LexA  | CRP  | ArcA  | LexA  | ArcA |      |  |
| grpE  | b2614 | rpoH  | CRP   | Fis   | rpoH  | CRP  | IHF   | rpoH  | CRP  |      |  |
| ydeA  | b1528 | ArcA  | CRP   | FNR   | ArcA  | Fis  | FNR   | ArcA  | FNR  |      |  |
| ffh   | b2610 | rpoH  | FNR   | Fis   | LexA  | Fis  | CpxR  | Fis   |      |      |  |



|       |       |        |        |      |      |       |       |      |      |      |  |
|-------|-------|--------|--------|------|------|-------|-------|------|------|------|--|
| yneH  | b1524 | PhoB   | IclR   | MarA | SoxS | PhoP  | MarA  | MarA |      |      |  |
| lon   | b0439 | rpoH   | GadX   | CRP  | rpoH | GadX  | CRP   | rpoH | GadX | CRP  |  |
| clpX  | b0438 | rpoH   | Fur    | IHF  | rpoH | CRP   | CpxR  | rpoH |      |      |  |
| clpP  | b0437 | rpoH   | CRP    | IHF  | rpoH | IHF   | CRP   | rpoH | CRP  | IHF  |  |
| tig   | b0436 | FNR    | Fis    | ArcA | Fis  | FNR   | CpxR  | FNR  | Fis  |      |  |
| bolA  | b0435 | OmpR   | H-NS   | Fis  | OmpR | H-NS  | CRP   | OmpR | H-NS |      |  |
| yajG  | b0434 | Fis    | CRP    | FNR  | Fis  | CRP   | CpxR  | Fis  | CRP  |      |  |
| cyoA  | b0432 | GadE   | Fur    | ArcA | Fur  | GadE  | ArcA  | GadE | Fur  | ArcA |  |
| cyoB  | b0431 | GadE   | ArcA   | Fur  | Fur  | GadE  | ArcA  | GadE | ArcA | Fur  |  |
| cyoC  | b0430 | GadE   | Fur    | ArcA | Fur  | GadE  | ArcA  | GadE | Fur  | ArcA |  |
| rpsP  | b2609 | FNR    | ArcA   | Fis  | FNR  | ArcA  | Fis   | FNR  | ArcA | Fis  |  |
| yfjA  | b2608 | FNR    | Fis    | ArcA | FNR  | ArcA  | Fis   | FNR  | Fis  | ArcA |  |
| trmD  | b2607 | FNR    | ArcA   | Fis  | FNR  | ArcA  | Fis   | FNR  | ArcA | Fis  |  |
| rplS  | b2606 | FNR    | Fis    | ArcA | FNR  | ArcA  | Fis   | FNR  | Fis  | ArcA |  |
| yfiN  | b2604 | CpxR   | rpoH   | Fur  | CpxR | FNR   | rpoH  | CpxR | rpoH |      |  |
| b2603 | b2603 | PhoP   | CpxR   | H-NS | CpxR | FNR   | CRP   | CpxR |      |      |  |
| tam   | b1519 | NtrC   | FNR    | CRP  | NtrC | Lrp   | RcsAB | NtrC |      |      |  |
| b1518 | b1518 | LsrR   | CRP    | FNR  | CRP  | ArcA  | FNR   | CRP  | FNR  |      |  |
| aroF  | b2601 | TyrR   | TrpR   | IHF  | TyrR | CRP   | ArcA  | TyrR |      |      |  |
| yneB  | b1517 | LsrR   | CRP    | FNR  | CRP  | IHF   | Fis   | CRP  |      |      |  |
| tyrA  | b2600 | TyrR   | TrpR   | IHF  | TyrR | CRP   | H-NS  | TyrR |      |      |  |
| b1516 | b1516 | CRP    | LsrR   | FNR  | CRP  | ArcA  | FNR   | CRP  | FNR  |      |  |
| cyoD  | b0429 | GadE   | Fur    | ArcA | Fur  | GadE  | ArcA  | GadE | Fur  | ArcA |  |
| b1513 | b1513 | CRP    | LsrR   | FNR  | NagC | CRP   | FruR  | CRP  |      |      |  |
| cyoE  | b0428 | GadE   | Fur    | ArcA | Fur  | GadE  | ArcA  | GadE | Fur  | ArcA |  |
| ydeW  | b1512 | CRP    | Fis    | ArcA | CRP  | FNR   | IHF   | CRP  |      |      |  |
| ydeV  | b1511 | CRP    | FNR    | Fur  | PhoB | CRP   | Fis   | CRP  |      |      |  |
| apbA  | b0425 | CpxR   | Fur    | MarA | PhoP | CpxR  | rpoH  | CpxR |      |      |  |
| yajK  | b0423 | PurR   | Fis    | rpoH | Fis  | CpxR  | IHF   | Fis  |      |      |  |
| xseB  | b0422 | FliHDC | H-NS   | PhoB | CpxR | H-NS  | CRP   | H-NS |      |      |  |
| ispA  | b0421 | FliHDC | CRP    | Fis  | H-NS | Fis   | CpxR  | Fis  |      |      |  |
| b1505 | b1505 | CRP    | FNR    | IHF  | CpxR | Fur   | IHF   | IHF  |      |      |  |
| b1502 | b1502 | PhoB   | FliHDC | CpxR | CpxR | RcsAB | rpoH  | CpxR |      |      |  |
| nusB  | b0416 | ArgR   | LexA   | rpoH | IHF  | rpoH  | Fur   | rpoH |      |      |  |
| ribD  | b0414 | LexA   | FruR   | Fis  | CpxR | Fis   | FNR   | Fis  |      |      |  |
| tsx   | b0411 | CytR   | DeoR   | CRP  | CytR | CRP   | ArcA  | CytR | CRP  |      |  |
| secD  | b0408 | Fis    | CRP    | FNR  | Fis  | CRP   | H-NS  | Fis  | CRP  |      |  |
| yajC  | b0407 | Fis    | PhoP   | PurR | Fis  | CRP   | CpxR  | Fis  |      |      |  |
| tgt   | b0406 | FNR    | Fis    | CRP  | Fis  | FNR   | CRP   | FNR  | Fis  | CRP  |  |
| queA  | b0405 | Fis    | CRP    | FNR  | Fis  | IHF   | ArcA  | Fis  |      |      |  |
| phoR  | b0400 | PhoB   | MalT   | DhaR | PhoB | Fur   | NarL  | PhoB |      |      |  |
| ptxA  | b4195 | UlaR   | HyfR   | IdnR | AlIS | IdnR  | FucR  | IdnR |      |      |  |
| yjfP  | b4190 | CsgD   | AraC   | CaiF | MarR | MprA  | CsgD  | CsgD |      |      |  |
| yjfO  | b4189 | Fis    | CRP    | FNR  | CRP  | FNR   | H-NS  | CRP  | FNR  |      |  |
| aidB  | b4187 | Ada    | MarA   | Lrp  | Lrp  | Ada   | H-NS  | Ada  | Lrp  |      |  |
| yqjE  | b3099 | MarA   | Fur    | Fis  | IHF  | Lrp   | Fis   | Fis  |      |      |  |
| yqjB  | b3096 | CpxR   | NarP   | ModE | CpxR | ArgR  | Fis   | CpxR |      |      |  |
| yqjA  | b3095 | CpxR   | rpoH   | Fis  | CpxR | SoxS  | TrpR  | CpxR |      |      |  |
| exuR  | b3094 | ExuR   | rpoH   | H-NS | ExuR | CpxR  | SoxS  | ExuR |      |      |  |
| exuT  | b3093 | ExuR   | GadX   | NarL | ExuR | FadR  | TrpR  | ExuR |      |      |  |
| uxaC  | b3092 | ExuR   | CRP    | ArcA | ExuR | FNR   | UxuR  | ExuR |      |      |  |
| uxaA  | b3091 | FliHDC | ExuR   | FNR  | ExuR | AgaR  | MngR  | ExuR |      |      |  |
| vacB  | b4179 | H-NS   | CpxR   | ArcA | CpxR | AgaR  | TyrR  | CpxR |      |      |  |
| purA  | b4177 | MarA   | GadE   | PurR | MarA | PurR  | GadE  | MarA | GadE | PurR |  |
| hflC  | b4175 | ModE   | CpxR   | Fis  | rpoH | SoxS  | CpxR  | CpxR |      |      |  |
| hflK  | b4174 | Fis    | rpoH   | CpxR | rpoH | CpxR  | Rob   | rpoH | CpxR |      |  |
| hflX  | b4173 | rpoH   | FNR    | Fis  | rpoH | CpxR  | Fis   | rpoH | Fis  |      |  |
| ygjU  | b3089 | IHF    | CRP    | Lrp  | FNR  | IHF   | ArcA  | IHF  |      |      |  |
| hfq   | b4172 | rpoH   | FruR   | H-NS | CpxR | rpoH  | CRP   | rpoH |      |      |  |

|       |       |       |       |      |       |      |       |       |      |  |      |
|-------|-------|-------|-------|------|-------|------|-------|-------|------|--|------|
| miaA  | b4171 | IHF   | CRP   | ArcA | rpoH  | CpxR | CRP   | CRP   |      |  |      |
| yjeS  | b4166 | CpxR  | IHF   | DnaA | CpxR  | rpoH | Fis   | CpxR  |      |  |      |
| psd   | b4160 | NikR  | CpxR  | GntR | CpxR  | rpoH | GadE  | CpxR  |      |  |      |
| ygiG  | b3073 | NtrC  | Fis   | IHF  | NtrC  | Fis  | IHF   | NtrC  | Fis  |  | IHF  |
| aer   | b3072 | FNR   | ArcA  | CRP  | FlhDC | FNR  | CpxR  | FNR   |      |  |      |
| yqjl  | b3071 | FNR   | ArcA  | CRP  | FNR   | Fis  | FruR  | FNR   |      |  |      |
| frdA  | b4154 | DcuR  | NarL  | FNR  | NarL  | FNR  | IHF   | NarL  | FNR  |  |      |
| frdB  | b4153 | NarL  | DcuR  | FNR  | NarL  | FNR  | IHF   | NarL  | FNR  |  |      |
| frdC  | b4152 | NarL  | ModE  | NarP | NarL  | FNR  | IHF   | NarL  |      |  |      |
| frdD  | b4151 | Cbl   | NarL  | CaiF | NarL  | FNR  | IHF   | NarL  |      |  |      |
| rpoD  | b3067 | LexA  | rpoH  | Fis  | LexA  | rpoH | IHF   | LexA  | rpoH |  |      |
| dnaG  | b3066 | LexA  | Fis   | IHF  | LexA  | Fis  | CpxR  | LexA  | Fis  |  |      |
| rpsU  | b3065 | LexA  | Fis   | FNR  | LexA  | Fis  | FNR   | LexA  | Fis  |  | FNR  |
| blc   | b4149 | Lrp   | CRP   | FNR  | Lrp   | FNR  | CRP   | Lrp   | CRP  |  | FNR  |
| efp   | b4147 | CpxR  | GadE  | Fis  | Fis   | FNR  | CpxR  | CpxR  | Fis  |  |      |
| yjeK  | b4146 | FlhDC | H-NS  | PhoB | FlhDC | BaeR | ArgR  | FlhDC |      |  |      |
| mopA  | b4143 | rpoH  | IHF   | CRP  | rpoH  | CRP  | IHF   | rpoH  | IHF  |  | CRP  |
| mopB  | b4142 | rpoH  | CRP   | IHF  | rpoH  | CRP  | IHF   | rpoH  | CRP  |  | IHF  |
| bacA  | b3057 | CpxR  | MtlR  | AsnC | BaeR  | NhaR | MtlR  | MtlR  |      |  |      |
| fxsA  | b4140 | rpoH  | TyrR  | GadX | rpoH  | CRP  | IHF   | rpoH  |      |  |      |
| ygiM  | b3055 | CpxR  | H-NS  | CRP  | Lrp   | CpxR | ArcA  | CpxR  |      |  |      |
| b3052 | b3052 | DeoR  | FadR  | rpoH | ArgR  | rpoH | PurR  | rpoH  |      |  |      |
| aspA  | b4139 | NarL  | CRP   | FNR  | NarL  | CRP  | FNR   | NarL  | CRP  |  | FNR  |
| dcuA  | b4138 | NarL  | Nac   | FNR  | NarL  | FNR  | CRP   | NarL  | FNR  |  |      |
| cadB  | b4132 | GadX  | CadC  | GadE | GadE  | GadX | H-NS  | GadX  | GadE |  |      |
| cadA  | b4131 | GadE  | GadX  | CadC | GadE  | GadX | H-NS  | GadE  | GadX |  |      |
| ygiE  | b3040 | CpxR  | LexA  | Fis  | FhlA  | PurR | CpxR  | CpxR  |      |  |      |
| lysU  | b4129 | Lrp   | IHF   | FNR  | Lrp   | CRP  | FNR   | Lrp   | FNR  |  |      |
| yjdl  | b4126 | NtrC  | IHF   | Fis  | CRP   | FNR  | Fis   | Fis   |      |  |      |
| dcuS  | b4125 | GadX  | SoxS  | IclR | NarL  | MarA | SoxS  | SoxS  |      |  |      |
| dcuB  | b4123 | DcuR  | NarL  | FNR  | NarL  | FNR  | FhlA  | NarL  | FNR  |  |      |
| ygiD  | b3039 | DgsA  | DeoR  | Rob  | DeoR  | CytR | EnvY  | DeoR  |      |  |      |
| fumB  | b4122 | DcuR  | NarL  | Fis  | NarL  | Fur  | FNR   | NarL  |      |  |      |
| yjdF  | b4121 | FhlA  | Cbl   | AppY | CaiF  | FhlA | YiaJ  | FhlA  |      |  |      |
| meIA  | b4119 | Fis   | CRP   | IHF  | CRP   | FNR  | H-NS  | CRP   |      |  |      |
| adiY  | b4116 | NarL  | FNR   | ArcA | ArcA  | CRP  | H-NS  | ArcA  |      |  |      |
| yjdE  | b4115 | NarL  | FNR   | IHF  | H-NS  | IHF  | ArcA  | IHF   |      |  |      |
| proP  | b4111 | Fis   | CRP   | H-NS | Fis   | CRP  | ArcA  | Fis   | CRP  |  |      |
| yjcZ  | b4110 | FlhDC | CpxR  | H-NS | FlhDC | CpxR | FNR   | FlhDC | CpxR |  |      |
| ygiX  | b3025 | NarP  | QseB  | NarL | QseB  | CysB | SoxS  | QseB  |      |  |      |
| ygiW  | b3024 | Fis   | CRP   | IHF  | CRP   | IHF  | FNR   | CRP   | IHF  |  |      |
| b3022 | b3022 | ArcA  | FNR   | Fis  | CRP   | FNR  | IHF   | FNR   |      |  |      |
| b3021 | b3021 | IHF   | FNR   | Fis  | CRP   | IHF  | FNR   | IHF   | FNR  |  |      |
| phnC  | b4106 | PhoB  | FhlA  | GntR | PhoB  | CysB | MalT  | PhoB  |      |  |      |
| phnD  | b4105 | MngR  | PhoB  | AllR | PhoB  | AgaR | MprA  | PhoB  |      |  |      |
| phnF  | b4102 | AgaR  | MngR  | AllR | PhoB  | AgaR | RcsAB | AgaR  |      |  |      |
| phnH  | b4100 | AllR  | CusR  | PhoB | PhoB  | AgaR | RcsAB | PhoB  |      |  |      |
| ygiR  | b3016 | Fis   | FNR   | CRP  | Fis   | rpoH | CpxR  | Fis   |      |  |      |
| yqhE  | b3012 | IHF   | Fis   | CRP  | SoxS  | IHF  | Fis   | IHF   | Fis  |  |      |
| metC  | b3008 | MetJ  | rpoH  | CRP  | MetJ  | Nac  | PurR  | MetJ  |      |  |      |
| exbB  | b3006 | Fur   | FNR   | IHF  | Fur   | CRP  | IHF   | Fur   | IHF  |  |      |
| exbD  | b3005 | Fur   | FNR   | IscR | Fur   | CRP  | IHF   | Fur   |      |  |      |
| b3001 | b3001 | CRP   | FNR   | H-NS | CRP   | FNR  | H-NS  | CRP   | FNR  |  | H-NS |
| gyrB  | b3699 | Fis   | LexA  | CpxR | Fis   | LexA | CpxR  | Fis   | LexA |  | CpxR |
| b3694 | b3694 | KdpE  | FlhDC | ExuR | MtlR  | ExuR | AgaR  | ExuR  |      |  |      |
| yidQ  | b3688 | CpxR  | CRP   | FNR  | CpxR  | CRP  | H-NS  | CpxR  | CRP  |  |      |
| ibpA  | b3687 | rpoH  | IHF   | CRP  | rpoH  | IHF  | CRP   | rpoH  | IHF  |  | CRP  |
| ibpB  | b3686 | rpoH  | IHF   | Fis  | rpoH  | IHF  | CRP   | rpoH  | IHF  |  |      |
| pheA  | b2599 | IHF   | FNR   | CRP  | IHF   | CRP  | NtrC  | IHF   | CRP  |  |      |

|       |       |       |       |       |       |       |       |       |      |      |
|-------|-------|-------|-------|-------|-------|-------|-------|-------|------|------|
| yfiA  | b2597 | IHF   | CRP   | FNR   | CRP   | IHF   | H-NS  | IHF   | CRP  |      |
| clpB  | b2592 | rpoH  | IHF   | CRP   | rpoH  | CRP   | IHF   | rpoH  | IHF  | CRP  |
| ilvB  | b3671 | CRP   | IHF   | FNR   | CRP   | IHF   | FNR   | CRP   | IHF  | FNR  |
| kgfP  | b2587 | ArcA  | Fis   | CRP   | ArcA  | CRP   | FNR   | ArcA  | CRP  |      |
| ilvN  | b3670 | CRP   | IHF   | CpxR  | CRP   | IHF   | FNR   | CRP   | IHF  |      |
| b1499 | b1499 | H-NS  | FlhDC | CpxR  | CpxR  | FlhDC | rpoH  | FlhDC | CpxR |      |
| trxC  | b2582 | OxyR  | PhoB  | TrpR  | OxyR  | Fur   | ArcA  | OxyR  |      |      |
| b1498 | b1498 | CRP   | Fis   | FNR   | CRP   | FNR   | IHF   | CRP   | FNR  |      |
| b1497 | b1497 | CRP   | Fis   | IHF   | CpxR  | Fis   | FlhDC | Fis   |      |      |
| ung   | b2580 | CpxR  | H-NS  | PhoB  | CpxR  | LexA  | PurR  | CpxR  |      |      |
| yddA  | b1496 | FhlA  | Fur   | CpxR  | RcsAB | CpxR  | rpoH  | CpxR  |      |      |
| yddB  | b1495 | CRP   | Fis   | FNR   | Fur   | CRP   | H-NS  | CRP   |      |      |
| gadB  | b1493 | GadE  | GadX  | H-NS  | GadE  | GadX  | H-NS  | GadE  | GadX | H-NS |
| xasA  | b1492 | GadE  | GadX  | H-NS  | GadE  | GadX  | H-NS  | GadE  | GadX | H-NS |
| b1491 | b1491 | RcsAB | NarP  | IscR  | RcsAB | ArgR  | FruR  | RcsAB |      |      |
| b1490 | b1490 | NtrC  | MprA  | PhoP  | NtrC  | FNR   | IHF   | NtrC  |      |      |
| yfiD  | b2579 | PdhR  | FNR   | ArcA  | ArcA  | PdhR  | FNR   | PdhR  | FNR  | ArcA |
| nlpA  | b3661 | IHF   | Lrp   | CRP   | IHF   | CRP   | H-NS  | IHF   | CRP  |      |
| yicL  | b3660 | PhoB  | Fur   | NtrC  | AgaR  | PspF  | PhoB  | PhoB  |      |      |
| srmB  | b2576 | Fis   | IHF   | LexA  | Fis   | FNR   | CRP   | Fis   |      |      |
| rpoE  | b2573 | CpxR  | IHF   | FNR   | CpxR  | CRP   | FNR   | CpxR  | FNR  |      |
| rseA  | b2572 | CpxR  | H-NS  | IHF   | CpxR  | CRP   | FNR   | CpxR  |      |      |
| rseB  | b2571 | CpxR  | FruR  | NarL  | CpxR  | FNR   | ArcA  | CpxR  |      |      |
| ddpA  | b1487 | NtrC  | ArgR  | rpoH  | NtrC  | ArgR  | Lrp   | NtrC  | ArgR |      |
| rseC  | b2570 | IclR  | CpxR  | SoxS  | CpxR  | PhoP  | Fis   | CpxR  |      |      |
| ddpB  | b1486 | NtrC  | NarL  | IdnR  | NtrC  | ArgR  | Lrp   | NtrC  |      |      |
| ddpD  | b1484 | NtrC  | NarL  | CpxR  | NtrC  | ArgR  | Lrp   | NtrC  |      |      |
| phoB  | b0399 | PhoB  | FNR   | IHF   | PhoB  | Fis   | SoxS  | PhoB  |      |      |
| osmC  | b1482 | RcsAB | NhaR  | Lrp   | RcsAB | Lrp   | H-NS  | RcsAB | Lrp  |      |
| b1481 | b1481 | RcsAB | CRP   | ArcA  | RcsAB | H-NS  | CRP   | RcsAB | CRP  |      |
| araJ  | b0396 | AraC  | CdaR  | CytR  | CRP   | AraC  | FNR   | AraC  |      |      |
| rpsV  | b1480 | RcsAB | OmpR  | Fis   | RcsAB | OmpR  | Fis   | RcsAB | OmpR | Fis  |
| aroM  | b0390 | TyrR  | Cbl   | NtrC  | TrpR  | TyrR  | CRP   | TyrR  |      |      |
| yicH  | b3655 | CpxR  | IHF   | Fis   | CpxR  | PurR  | SoxS  | CpxR  |      |      |
| lepA  | b2569 | Fis   | Lrp   | FNR   | Fis   | FNR   | CRP   | Fis   | FNR  |      |
| recG  | b3652 | H-NS  | GadE  | FlhDC | FlhDC | rpoH  | FruR  | FlhDC |      |      |
| lepB  | b2568 | ModE  | RcsAB | SoxS  | SoxS  | CpxR  | FhlA  | SoxS  |      |      |
| spoU  | b3651 | FNR   | H-NS  | ArcA  | rpoH  | CpxR  | H-NS  | H-NS  |      |      |
| rcn   | b2567 | H-NS  | Fis   | FlhDC | Fis   | CpxR  | CRP   | Fis   |      |      |
| spoT  | b3650 | rpoH  | H-NS  | FruR  | rpoH  | CRP   | Fis   | rpoH  |      |      |
| era   | b2566 | FruR  | FlhDC | CpxR  | FlhDC | Fis   | CpxR  | FlhDC | CpxR |      |
| recO  | b2565 | CpxR  | FlhDC | Fis   | PhoB  | CsgD  | FlhDC | FlhDC |      |      |
| sfcA  | b1479 | NarL  | FruR  | GalR  | FruR  | Fis   | PhoP  | FruR  |      |      |
| fdnI  | b1476 | NarP  | NarL  | AgaR  | NarP  | NarL  | FNR   | NarP  | NarL |      |
| fdnH  | b1475 | NarP  | NarL  | CsgD  | NarP  | NarL  | FNR   | NarP  | NarL |      |
| fdnG  | b1474 | NarP  | NarL  | CaiF  | NarP  | NarL  | FNR   | NarP  | NarL |      |
| yaiA  | b0389 | TyrR  | TrpR  | ArgP  | TrpR  | TyrR  | CRP   | TyrR  | TrpR |      |
| aroL  | b0388 | TyrR  | TrpR  | CRP   | TrpR  | TyrR  | CRP   | TyrR  | TrpR | CRP  |
| yaiC  | b0385 | CsgD  | Rob   | DicA  | CsgD  | FadR  | GntR  | CsgD  |      |      |
| psiF  | b0384 | PhoB  | EvgA  | GadW  | PhoB  | CRP   | FNR   | PhoB  |      |      |
| phoA  | b0383 | PhoB  | Fur   | FNR   | PhoB  | CRP   | FNR   | PhoB  | FNR  |      |
| yaiB  | b0382 | CRP   | Fis   | IHF   | CRP   | ArcA  | IHF   | CRP   | IHF  |      |
| gmk   | b3648 | rpoH  | CpxR  | LexA  | CpxR  | LexA  | Fis   | CpxR  | LexA |      |
| dinD  | b3645 | CRP   | IHF   | FNR   | LexA  | CRP   | ArcA  | CRP   |      |      |
| rph   | b3643 | FNR   | Fis   | CRP   | FNR   | Fis   | IHF   | FNR   | Fis  |      |
| pyrE  | b3642 | MprA  | DnaA  | RcsAB | BaeR  | RcsAB | PhoB  | RcsAB |      |      |
| yfhD  | b2558 | Rob   | Fis   | Fur   | Rob   | BaeR  | RcsAB | Rob   |      |      |
| ttk   | b3641 | PhoP  | FruR  | Lrp   | Lrp   | FNR   | IHF   | Lrp   |      |      |
| purL  | b2557 | PurR  | PhoP  | CRP   | PurR  | PhoP  | Lrp   | PurR  | PhoP |      |

|       |       |      |       |       |       |       |       |       |      |     |
|-------|-------|------|-------|-------|-------|-------|-------|-------|------|-----|
| yfhA  | b2554 | FhIA | YiaJ  | XylR  | CaiF  | HyfR  | YiaJ  | YiaJ  |      |     |
| narU  | b1469 | GadW | RcsAB | CsgD  | RcsAB | UxuR  | ArgR  | RcsAB |      |     |
| glyA  | b2551 | MetR | PurR  | FNR   | MetR  | PurR  | CRP   | MetR  | PurR |     |
| b1463 | b1463 | NtrC | NarL  | CRP   | PhoP  | NtrC  | LexA  | NtrC  |      |     |
| yaiT  | b0371 | NarL | Fur   | DicA  | rpoH  | NarL  | Fur   | NarL  | Fur  |     |
| dfp   | b3639 | FNR  | CRP   | Fis   | Fis   | CRP   | SoxS  | CRP   | Fis  |     |
| radC  | b3638 | AgaR | ExuR  | Lacl  | FadR  | AgaR  | FlhDC | AgaR  |      |     |
| rpmB  | b3637 | Fis  | FNR   | CRP   | FNR   | CpxR  | Fis   | Fis   | FNR  |     |
| rpmG  | b3636 | FNR  | FadR  | DeoR  | FNR   | CRP   | Fis   | FNR   |      |     |
| mutM  | b3635 | rpoH | Nac   | SoxS  | rpoH  | FlhDC | FruR  | rpoH  |      |     |
| rfaQ  | b3632 | rpoH | PhoP  | Fis   | rpoH  | CpxR  | IHF   | rpoH  |      |     |
| yphF  | b2548 | Cbl  | PdhR  | GntR  | GntR  | EvgA  | NagC  | GntR  |      |     |
| rfaG  | b3631 | LexA | SoxS  | rpoH  | CpxR  | FlhDC | rpoH  | rpoH  |      |     |
| rfaP  | b3630 | FNR  | Fis   | CRP   | CpxR  | IHF   | CRP   | CRP   |      |     |
| yphC  | b2545 | Rob  | DeoR  | CsgD  | RcsAB | UxuR  | Rob   | Rob   |      |     |
| hcaD  | b2542 | HcaR | GntR  | RcsAB | RcsAB | NtrC  | NagC  | RcsAB |      |     |
| b1458 | b1458 | CpxR | CRP   | FNR   | LexA  | CRP   | IHF   | CRP   |      |     |
| hemB  | b0369 | rpoH | Fis   | NarL  | SoxS  | rpoH  | CpxR  | rpoH  |      |     |
| b1452 | b1452 | Fur  | CRP   | FNR   | Fur   | CRP   | IHF   | Fur   | CRP  |     |
| tauB  | b0366 | Cbl  | CysB  | FadR  | CysB  | FNR   | CpxR  | CysB  |      |     |
| b1450 | b1450 | Fis  | CRP   | rpoH  | PhoB  | CRP   | Fis   | Fis   | CRP  |     |
| tauA  | b0365 | Cbl  | CysB  | AllR  | CysB  | FNR   | ModE  | CysB  |      |     |
| rfaS  | b3629 | rpoH | SoxS  | Fis   | CpxR  | CRP   | Fis   | Fis   |      |     |
| rfaJ  | b3626 | CRP  | Fis   | H-NS  | CRP   | rpoH  | CpxR  | CRP   |      |     |
| rfaZ  | b3624 | MalT | rpoH  | LrhA  | rpoH  | CpxR  | Fis   | rpoH  |      |     |
| rfaK  | b3623 | CpxR | H-NS  | PhoP  | CRP   | rpoH  | CpxR  | CpxR  |      |     |
| rfaL  | b3622 | rpoH | H-NS  | CpxR  | rpoH  | CRP   | IHF   | rpoH  |      |     |
| hcaA1 | b2538 | HcaR | ExuR  | PhoB  | PhoB  | CysB  | PhoP  | PhoB  |      |     |
| rfaC  | b3621 | rpoH | H-NS  | CpxR  | rpoH  | Fis   | FNR   | rpoH  |      |     |
| hcaR  | b2537 | HcaR | CRP   | Fis   | DnaA  | Fis   | NtrC  | Fis   |      |     |
| rfaF  | b3620 | rpoH | Lrp   | CpxR  | rpoH  | CpxR  | Fis   | rpoH  | CpxR |     |
| csiE  | b2535 | H-NS | CRP   | Lrp   | H-NS  | CRP   | FNR   | H-NS  | CRP  |     |
| b2531 | b2531 | IscR | CRP   | IHF   | IscR  | CRP   | IHF   | IscR  | CRP  | IHF |
| b1447 | b1447 | H-NS | CpxR  | OxyR  | FlhDC | CpxR  | SoxS  | CpxR  |      |     |
| yfhO  | b2530 | IscR | CRP   | FNR   | IscR  | CRP   | FNR   | IscR  | CRP  | FNR |
| b1446 | b1446 | ModE | Rob   | SoxS  | PhoB  | rpoH  | Rob   | Rob   |      |     |
| yaiN  | b0357 | FadR | FruR  | CRP   | CRP   | IHF   | FNR   | CRP   |      |     |
| adhC  | b0356 | FadR | FruR  | CRP   | CRP   | IHF   | rpoH  | CRP   |      |     |
| mhpT  | b0353 | OxyR | rpoH  | GntR  | GntR  | NagC  | PurR  | GntR  |      |     |
| rfaD  | b3619 | rpoH | NarL  | Fis   | rpoH  | GadE  | Lrp   | rpoH  |      |     |
| htrL  | b3618 | CRP  | Fis   | H-NS  | CRP   | CpxR  | ArcA  | CRP   |      |     |
| kbl   | b3617 | Lrp  | CRP   | Fis   | Lrp   | CRP   | IHF   | Lrp   | CRP  |     |
| tdh   | b3616 | Lrp  | Fis   | H-NS  | Lrp   | CRP   | IHF   | Lrp   |      |     |
| yibP  | b3613 | LexA | Fis   | H-NS  | ArgR  | FlhDC | LexA  | LexA  |      |     |
| b2529 | b2529 | IscR | FNR   | Fur   | IscR  | CRP   | FNR   | IscR  | FNR  |     |
| yfhF  | b2528 | IscR | FNR   | IHF   | IscR  | CRP   | IHF   | IscR  | IHF  |     |
| yfhE  | b2527 | IscR | CRP   | H-NS  | CRP   | IscR  | IHF   | IscR  | CRP  |     |
| hscA  | b2526 | IscR | Fis   | FNR   | FNR   | IHF   | ArcA  | FNR   |      |     |
| fdx   | b2525 | FNR  | Fur   | IHF   | FNR   | IHF   | Fis   | FNR   | IHF  |     |
| yfhJ  | b2524 | IscR | H-NS  | FNR   | FNR   | IHF   | ArcA  | FNR   |      |     |
| b1437 | b1437 | LsrR | FlhDC | CpxR  | RcsAB | FlhDC | NtrC  | FlhDC |      |     |
| mhpC  | b0349 | YiaJ | MhpR  | AllR  | ArgR  | NagC  | MhpR  | MhpR  |      |     |
| b1431 | b1431 | EnvY | MprA  | NtrC  | Fis   | NtrC  | CRP   | NtrC  |      |     |
| mhpR  | b0346 | CRP  | ArcA  | FNR   | NtrC  | Fis   | CRP   | CRP   |      |     |
| lacl  | b0345 | NtrC | FucR  | AraC  | CRP   | NtrC  | IHF   | NtrC  |      |     |
| lacZ  | b0344 | H-NS | CRP   | Fis   | H-NS  | CRP   | Lacl  | H-NS  | CRP  |     |
| lacY  | b0343 | H-NS | Fis   | CRP   | H-NS  | CRP   | FNR   | H-NS  | CRP  |     |
| lacA  | b0342 | H-NS | CRP   | Fis   | H-NS  | CRP   | FNR   | H-NS  | CRP  |     |
| gpsA  | b3608 | FruR | Fis   | rpoH  | rpoH  | NagC  | IHF   | rpoH  |      |     |

|       |       |      |       |       |       |       |       |       |      |      |     |
|-------|-------|------|-------|-------|-------|-------|-------|-------|------|------|-----|
| cysE  | b3607 | CpxR | CusR  | GntR  | CpxR  | FNR   | ArgR  | CpxR  |      |      |     |
| lldD  | b3605 | PdhR | ArcA  | FlhDC | ArcA  | CRP   | Fis   | ArcA  |      |      |     |
| lldR  | b3604 | PdhR | ArcA  | IHF   | ArcA  | PdhR  | CRP   | PdhR  | ArcA |      |     |
| lldP  | b3603 | PdhR | ArcA  | CRP   | ArcA  | PdhR  | CRP   | PdhR  | ArcA |      | CRP |
| ndk   | b2518 | Fis  | CRP   | IHF   | CRP   | Fis   | FNR   | Fis   | CRP  |      |     |
| mtlR  | b3601 | FruR | Fis   | H-NS  | FruR  | Fis   | PhoP  | FruR  | Fis  |      |     |
| yfgB  | b2517 | rpoH | FNR   | Fis   | Fis   | rpoH  | ArcA  | rpoH  | Fis  |      |     |
| mtlD  | b3600 | FruR | Fis   | GadE  | FruR  | Fis   | CRP   | FruR  | Fis  |      |     |
| yfgA  | b2516 | ArgR | rpoH  | FlhDC | rpoH  | CpxR  | NagC  | rpoH  |      |      |     |
| gcpE  | b2515 | FNR  | rpoH  | ArgR  | rpoH  | CpxR  | SoxS  | rpoH  |      |      |     |
| b1428 | b1428 | NtrC | CRP   | FNR   | SoxS  | MarA  | NtrC  | NtrC  |      |      |     |
| b2511 | b2511 | ArgR | FruR  | Fis   | Fis   | PurR  | NarL  | Fis   |      |      |     |
| b1422 | b1422 | CRP  | FNR   | ArcA  | CRP   | IHF   | Fis   | CRP   |      |      |     |
| codA  | b0337 | Nac  | PurR  | CRP   | Nac   | PurR  | IHF   | Nac   | PurR |      |     |
| trg   | b1421 | H-NS | CRP   | FNR   | FlhDC | CpxR  | FNR   | FNR   |      |      |     |
| codB  | b0336 | Nac  | PurR  | CRP   | Nac   | PurR  | IHF   | Nac   | PurR |      |     |
| prpE  | b0335 | AllR | FucR  | PrpR  | AllR  | FadR  | NagC  | AllR  |      |      |     |
| prpD  | b0334 | PrpR | Fis   | GntR  | Fis   | IHF   | CRP   | Fis   |      |      |     |
| prpC  | b0333 | PrpR | CRP   | Fis   | NagC  | Fis   | CRP   | CRP   | Fis  |      |     |
| guaB  | b2508 | PurR | DnaA  | Fis   | PurR  | Fis   | DnaA  | PurR  | DnaA | Fis  |     |
| guaA  | b2507 | PurR | DnaA  | Fis   | PurR  | Fis   | CRP   | PurR  | Fis  |      |     |
| aldA  | b1415 | DnaA | ArcA  | CRP   | CRP   | ArcA  | DnaA  | DnaA  | ArcA |      | CRP |
| ydcF  | b1414 | NtrC | FlhDC | CpxR  | RcsAB | TrpR  | CpxR  | CpxR  |      |      |     |
| b1410 | b1410 | GntR | AllR  | RcsAB | UxuR  | RcsAB | NagC  | RcsAB |      |      |     |
| yahG  | b0321 | SoxS | MarA  | PhoB  | AgaR  | PhoB  | NtrC  | PhoB  |      |      |     |
| betI  | b0313 | ArcA | BetI  | FNR   | ArcA  | CRP   | PhoP  | ArcA  |      |      |     |
| betB  | b0312 | ArcA | FNR   | IHF   | ArcA  | CRP   | Fis   | ArcA  |      |      |     |
| torD  | b0998 | TorR | NarL  | NarP  | NarL  | NagC  | NtrC  | NarL  |      |      |     |
| torS  | b0993 | CdaR | Cbl   | Rob   | NarL  | Rob   | NtrC  | Rob   |      |      |     |
| appA  | b0980 | AppY | NarL  | Rob   | ArcA  | NarL  | H-NS  | NarL  |      |      |     |
| phnJ  | b4098 | AllR | PhoB  | CaiF  | PhoB  | AgaR  | CysB  | PhoB  |      |      |     |
| phnK  | b4097 | AllR | CaiF  | PhoB  | AgaR  | NsrR  | PhoB  | PhoB  |      |      |     |
| phnL  | b4096 | PhoB | NarP  | NarL  | AgaR  | PhoB  | MprA  | PhoB  |      |      |     |
| appB  | b0979 | AppY | NarP  | ArcA  | ArcA  | NarL  | H-NS  | ArcA  |      |      |     |
| appC  | b0978 | AppY | ArcA  | H-NS  | ArcA  | NarL  | H-NS  | ArcA  | H-NS |      |     |
| hyaF  | b0977 | NarP | IscR  | AppY  | NarP  | NarL  | ArcA  | NarP  |      |      |     |
| hyaE  | b0976 | NarP | IscR  | NarL  | NarP  | NarL  | IscR  | NarP  | IscR | NarL |     |
| hyaD  | b0975 | NarP | IscR  | NarL  | NarP  | NarL  | IscR  | NarP  | IscR | NarL |     |
| hyaC  | b0974 | NarP | IscR  | NarL  | NarP  | NarL  | IscR  | NarP  | IscR | NarL |     |
| hyaB  | b0973 | NarP | IscR  | AppY  | NarP  | NarL  | ArcA  | NarP  |      |      |     |
| hyaA  | b0972 | NarP | IscR  | NarL  | NarP  | NarL  | IscR  | NarP  | IscR | NarL |     |
| yccA  | b0970 | CpxR | FNR   | CRP   | CpxR  | CRP   | rpoH  | CpxR  | CRP  |      |     |
| yjcV  | b4086 | GntR | AscG  | HU    | GntR  | AgaR  | NagC  | GntR  |      |      |     |
| yccV  | b0966 | rpoH | FruR  | H-NS  | CRP   | rpoH  | H-NS  | rpoH  | H-NS |      |     |
| b0965 | b0965 | NtrC | AllS  | OxyR  | NtrC  | PhoB  | CpxR  | NtrC  |      |      |     |
| yjcQ  | b4081 | NanR | AgaR  | TdcA  | AgaR  | CsgD  | NsrR  | AgaR  |      |      |     |
| sulA  | b0958 | LexA | ArcA  | CRP   | LexA  | CRP   | ArcA  | LexA  | ArcA |      | CRP |
| nrfE  | b4074 | AllR | AtoC  | NarP  | NarP  | AgaR  | Rob   | NarP  |      |      |     |
| ompA  | b0957 | CRP  | FruR  | ArcA  | CRP   | IHF   | CpxR  | CRP   |      |      |     |
| nrfD  | b4073 | NarP | MngR  | AtoC  | FlhDC | NarP  | NarL  | NarP  |      |      |     |
| nrfC  | b4072 | MngR | NarP  | ZraR  | NarP  | NarL  | FlhDC | NarP  |      |      |     |
| nrfA  | b4070 | NarP | PdhR  | RcsAB | NarP  | NarL  | FlhDC | NarP  |      |      |     |
| pqiB  | b0951 | MarA | SoxS  | rpoH  | SoxS  | MarA  | Fis   | MarA  | SoxS |      |     |
| pqiA  | b0950 | MarA | SoxS  | TrpR  | SoxS  | MarA  | RcsAB | MarA  | SoxS |      |     |
| acs   | b4069 | Fis  | CRP   | IHF   | Fis   | IHF   | CRP   | Fis   | CRP  | IHF  |     |
| yjcH  | b4068 | Fis  | CRP   | H-NS  | Fis   | IHF   | CRP   | Fis   | CRP  |      |     |
| yjcG  | b4067 | Fis  | H-NS  | CRP   | Fis   | IHF   | CRP   | Fis   | CRP  |      |     |
| uup   | b0949 | Fis  | H-NS  | FlhDC | Fis   | SoxS  | FNR   | Fis   |      |      |     |
| soxS  | b4062 | SoxS | SoxR  | LexA  | SoxS  | CRP   | IHF   | SoxS  |      |      |     |

|      |       |      |      |      |      |       |      |      |      |     |
|------|-------|------|------|------|------|-------|------|------|------|-----|
| pyrD | b0945 | PurR | FNR  | IHF  | PurR | FNR   | IHF  | PurR | FNR  | IHF |
| ycbF | b0944 | CusR | NagC | GntR | UxuR | RcsAB | NagC | NagC |      |     |
| yjcB | b4060 | CRP  | Fur  | FNR  | CRP  | ArcA  | IHF  | CRP  |      |     |
| ssb  | b4059 | LexA | NhaR | PurR | LexA | rpoH  | CpxR | LexA |      |     |
| uvrA | b4058 | LexA | ArcA | Lrp  | LexA | ArcA  | CRP  | LexA | ArcA |     |
| yjbQ | b4056 | Fur  | FNR  | NarL | CRP  | FNR   | H-NS | FNR  |      |     |
| tyrB | b4054 | TyrR | FruR | Lrp  | TyrR | CpxR  | IHF  | TyrR |      |     |
| ssuC | b0934 | Cbl  | NagC | CusR | NagC | PurR  | PhoB | NagC |      |     |
| pncB | b0931 | CRP  | Fis  | IHF  | Lrp  | CpxR  | CRP  | CRP  |      |     |
| asnS | b0930 | FNR  | CRP  | Fis  | NagC | Fis   | PhoP | Fis  |      |     |
