# Supplementary material for: Reconstruction of Escherichia coli transcriptional regulatory networks via regulon-based associations
Source: PubMed Central journal article supplement (PMC2689187; doi:10.1186/1752-0509-3-39), 2009-04-14
Supplement: 1752-0509-3-39-S4.pdf [file 1752-0509-3-39-S4.pdf]

| Operon Name       | Common Regulator 1 | Common Regulator 2 | Common Regulator 3 |
|-------------------|--------------------|--------------------|--------------------|
| aaeXAB            | HyfR               | AgaR               | CpxR               |
| aas-lplT          | AcrR               | AllS               | AscG               |
| aat               | AllS               | AraC               | Cbl                |
| abgABT-ogt        | NarL               | CpxR               | NhaR               |
| abgR              | CRP                | FNR                | FlhDC              |
| abrB              | FlhDC              | CpxR               | Fur                |
| accA              | CpxR               | Fis                | FlhDC              |
| accBC             | FNR                | CRP                | Fis                |
| accD              | LexA               | Fis                | Fur                |
| aceBAK            | FruR               | ArcA               | IclR               |
| ackA-pta          | ArcA               | FNR                | CRP                |
| acnA              | FruR               | ArcA               | Fis                |
| acnB              | ArcA               | Fis                | FruR               |
| acpH              | AllR               | CpxR               | FlhDC              |
| acrAB             | Rob                | SoxS               | MarA               |
| acrD              | BaeR               | EvgA               | GntR               |
| acrEF             | YiaJ               | AgaR               | AllR               |
| acrR              | AcrR               | FruR               | LsrR               |
| acs-yjcH-actP     | CRP                | Fis                | IHF                |
| ada-alkB          | RcsAB              | UxuR               | Ada                |
| add               | CRP                | FNR                | Fis                |
| ade               | AllS               | CadC               | GadW               |
| adhE              | Fis                | FruR               | NarL               |
| adhP              | CRP                | Fis                | FruR               |
| adiA              | FNR                | H-NS               | IHF                |
| adiC              | IHF                | ArcA               | FNR                |
| adiY              | ArcA               | CRP                | FNR                |
| adk               | CRP                | FNR                | Fis                |
| adrA              | CsgD               | DicA               | FadR               |
| aegA              | AgaR               | AllR               | FlhDC              |
| aer               | FNR                | ArcA               | CRP                |
| aes               | AllR               | FadR               | FlhDC              |
| agaR              | AgaR               | CpxR               | ExuR               |
| agaS-kbaY-agaBCDI | AgaR               | NagC               | Cbl                |
| agp               | CRP                | FNR                | Fis                |
| ahpCF             | MetJ               | OxyR               | CRP                |
| aidB              | Ada                | Lrp                | H-NS               |
| alaS              | FNR                | Fis                | FruR               |
| aldA              | ArcA               | CRP                | DnaA               |
| aldB              | CRP                | Fis                | IHF                |
| alkA              | AllR               | NagC               | NarP               |
| allA              | AgaR               | AllR               | HyfR               |
| allDC-ylbA        | AllS               | FlhDC              | GntR               |
| allR              | Lrp                | AraC               | ArgR               |
| allS              | AllR               | AcrR               | GntR               |
| alpA              | AllR               | GntR               | GutM               |
| alr               | ArgR               | AscG               | EvgA               |
| amiA-hemF         | AgaR               | AllR               | AllS               |
| amn               | CRP                | FNR                | Fis                |
| ampC              | Fur                | H-NS               | ModE               |
| ampDE             | BetI               | CRP                | Cbl                |
| ampG              | AllR               | FhIA               | GadX               |
| ampH              | CpxR               | CsgD               | PhoB               |
| amyA              | NtrC               | IHF                | Lrp                |
| anmK              | LeuO               | MarR               | NagC               |
| ansA-pncA         | PhoP               | CRP                | AppY               |
| ansB              | AraC               | CRP                | CueR               |
| ansP              | FNR                | MarA               | NtrC               |

|                             |       |       |       |
|-----------------------------|-------|-------|-------|
| apbE                        | LeuO  | MetJ  | OxyR  |
| aphA                        | CRP   | FNR   | FlhDC |
| appCB-yccB-appA             | ArcA  | H-NS  | NarL  |
| appY                        | H-NS  | CRP   | FNR   |
| apt                         | Fis   | ArcA  | CRP   |
| aqpZ                        | AllR  | ArgR  | AscG  |
| araBAD                      | AraC  | CRP   | H-NS  |
| araC                        | AraC  | CRP   | DcuR  |
| araE                        | AraC  | CRP   | Cbl   |
| araFGH                      | AraC  | CRP   | H-NS  |
| araJ                        | AraC  | CRP   | CdaR  |
| arcA                        | CRP   | FNR   | ArcA  |
| argA                        | ArgR  | CRP   | IHF   |
| argCBH                      | ArgR  | CRP   | IHF   |
| argD                        | ArgR  | PhoP  | CRP   |
| argE                        | ArgR  | CRP   | GadE  |
| argF                        | ArgR  | IHF   | CRP   |
| argG                        | ArgR  | CRP   | IHF   |
| argI                        | ArgR  | CRP   | IHF   |
| argO                        | CpxR  | FNR   | Fis   |
| argP                        | PhoB  | ArgR  | FhIA  |
| argR                        | ArgR  | CytR  | MelR  |
| argS                        | ArcA  | CRP   | FNR   |
| argT-hisJQMP                | NtrC  | IHF   | ArgR  |
| arnBCADTEF                  | FlhDC | CpxR  | IHF   |
| aroF-tyrA                   | TyrR  | CRP   | IHF   |
| aroG                        | CpxR  | TyrR  | CRP   |
| aroH                        | TrpR  | CRP   | FNR   |
| aroKB-damX-dam-rpe-gph-trpS | CpxR  | Fis   | rpoH  |
| aroL-yaiA-aroM              | TyrR  | TrpR  | CRP   |
| aroP                        | CRP   | TyrR  | IHF   |
| arpA                        | FNR   | FlhDC | GntR  |
| arsRBC                      | RcsAB | AgaR  | AllR  |
| artJ                        | ArgR  | CRP   | IHF   |
| artPIQM                     | IHF   | ArcA  | CRP   |
| ascFB                       | AscG  | CytR  | HyfR  |
| ascG                        | AraC  | AscG  | HyfR  |
| asd                         | CRP   | Lrp   | FNR   |
| aslA                        | FlhDC | MngR  | NarP  |
| aslB                        | Rob   | Cbl   | GntR  |
| asmA                        | AsnC  | LexA  | Nac   |
| asnA                        | AgaR  | AllR  | AsnC  |
| asnB                        | GadX  | ArgR  | CRP   |
| asnC-mioC-mnmG-gidB         | Nac   | AsnC  | Fis   |
| asnS                        | Fis   | CRP   | FNR   |
| aspA-dcuA                   | FNR   | NarL  | CRP   |
| aspC                        | ArgR  | CRP   | FNR   |
| aspS                        | FNR   | Fis   | CRP   |
| asr                         | CRP   | PhoB  | ArcA  |
| astCADBE                    | ArgR  | NtrC  | Lrp   |
| atl                         | ArgR  | CpxR  | CsgD  |
| atoDAEB                     | AtoC  | NagC  | AgaR  |
| atoSC                       | GalR  | GalS  | GntR  |
| atpIBEFHAGDC                | FNR   | Fis   | CRP   |
| avtA                        | IHF   | FNR   | FlhDC |
| azoR                        | CsgD  | LexA  | Nac   |
| bacA                        | MtlR  | AsnC  | BaeR  |
| barA                        | NarP  | CaiF  | GadX  |
| basRS                       | FlhDC | Fur   | LexA  |

|               |       |       |       |
|---------------|-------|-------|-------|
| bax           | FNR   | Fis   | CRP   |
| bcr           | MetJ  | MetR  | NarP  |
| bcsABZC       | CsgD  | AgaR  | PhoB  |
| bcsEFG        | CpxR  | DnaA  | ExuR  |
| bdm-sra       | RcsAB | CRP   | Fis   |
| betIBA        | ArcA  | CRP   | FNR   |
| bfd-bfr       | CRP   | FNR   | Fur   |
| bglA          | CpxR  | MetR  | PhoB  |
| bglGFB        | Fis   | H-NS  | FlhDC |
| bglH-yieLK    | GntR  | BaeR  | Cbl   |
| bglX          | AscG  | CdaR  | LrhA  |
| bhsA          | CRP   | FNR   | IHF   |
| bioA          | ArgR  | CRP   | CpxR  |
| bioBFCD       | CRP   | CpxR  | H-NS  |
| bioH          | AraC  | IdnR  | LexA  |
| bisC          | UlaR  | BaeR  | DicA  |
| blc           | CRP   | FNR   | Lrp   |
| bolA          | H-NS  | OmpR  | CRP   |
| borD          | CRP   | IHF   | PhoP  |
| brnQ-proY     | AppY  | FhlA  | Fur   |
| bssR          | ArcA  | FNR   | CRP   |
| bssS          | rpoH  | CRP   | CaiF  |
| btuB-murl     | Fis   | CpxR  | PhoP  |
| btuCED        | Lrp   | MhpR  | Cbl   |
| cadBA         | GadE  | GadX  | CadC  |
| cadC          | CytR  | FNR   | GaiR  |
| caiF          | H-NS  | NarL  | FNR   |
| caiTABCDE     | CaiF  | AlIR  | NtrC  |
| can           | CRP   | CpxR  | FNR   |
| carAB         | ArgR  | IHF   | PurR  |
| cbl           | CysB  | NtrC  | ArcA  |
| cbpAM         | H-NS  | Lrp   | AppY  |
| cbrB          | Cbl   | FhlA  | GntR  |
| cbrC          | AraC  | CpxR  | DicA  |
| cdaR          | CdaR  | CRP   | FNR   |
| cdd           | CRP   | CytR  | FNR   |
| cdh           | ArgR  | CpxR  | FruR  |
| cdsA          | AlIS  | CRP   | Fis   |
| cedA          | NagC  | NikR  | NtrC  |
| cfa           | CRP   | FNR   | H-NS  |
| chaA          | CpxR  | CRP   | Fis   |
| chaBC         | PhoB  | CRP   | CpxR  |
| chbBCARFG     | NagC  | ChbR  | CusR  |
| cho           | CpxR  | FlhDC | LexA  |
| chpSB         | DhaR  | CRP   | Cbl   |
| cirA          | CRP   | Fur   | FNR   |
| citCDEFXG     | AgaR  | NagC  | PhoB  |
| citT          | Cbl   | CdaR  | CsgD  |
| clcA          | CdaR  | CpxR  | DicA  |
| clcB          | RcsAB | FhlA  | FlhDC |
| clD           | CRP   | FNR   | Fis   |
| clpA          | ArcA  | CRP   | FNR   |
| clpB          | CRP   | IHF   | rpoH  |
| clpPX-lon     | rpoH  | CRP   | IHF   |
| clpS          | IHF   | CRP   | FruR  |
| cls-yciU      | PhoP  | BaeR  | DnaA  |
| cmk-rpsA-ihfB | FNR   | Fis   | CRP   |
| cmr           | FadR  | Fur   | Nac   |
| cmtBA-yggPFDC | AgaR  | AtoC  | CaiF  |

|                  |       |       |       |
|------------------|-------|-------|-------|
| cnu              | CRP   | FNR   | IHF   |
| coaA             | CRP   | CpxR  | LrhA  |
| coaE-yacFG       | FlhDC | NagC  | ArgR  |
| cobUST           | ModE  | PhoP  | FruR  |
| codBA            | Nac   | PurR  | CRP   |
| cof              | AtoC  | Cbl   | CpxR  |
| copA             | CRP   | CueR  | FlhDC |
| corA             | FNR   | PhoP  | CRP   |
| cpdB             | AraC  | CRP   | FruR  |
| cpxRA            | CpxR  | AgaR  | ExuR  |
| crcB             | OxyR  | CpxR  | GntR  |
| creABCD          | GntR  | PhoB  | AraC  |
| crl              | ArcA  | CRP   | FNR   |
| crp              | CRP   | FruR  | IHF   |
| csdAE            | FlhDC | FruR  | RcsAB |
| csgBAC           | CpxR  | CsgD  | ArgR  |
| csgDEFG          | CsgD  | RcsAB | CpxR  |
| csiD-ygaF-gabDTP | H-NS  | Lrp   | Nac   |
| csiE             | CRP   | H-NS  | FNR   |
| csiR             | ArgR  | Fis   | H-NS  |
| cspA             | CRP   | FNR   | Fis   |
| cspB             | AraC  | CRP   | FNR   |
| cspD             | H-NS  | ArcA  | CRP   |
| cspE             | CRP   | FNR   | GntR  |
| cspF             | CRP   | CpxR  | CytR  |
| cspH             | ArcA  | ArgP  | CRP   |
| cspI             | ArcA  | CRP   | FNR   |
| csrA             | CRP   | CpxR  | IHF   |
| csrD             | Cbl   | CpxR  | FruR  |
| cstA             | ArcA  | CRP   | FNR   |
| cueR             | GadX  | IHF   | Lrp   |
| cusCFBA          | CusR  | CRP   | FNR   |
| cusRS            | CusR  | BirA  | CsgD  |
| cutC             | CRP   | Fur   | IHF   |
| cvpA-purF-ubiX   | PurR  | CRP   | FNR   |
| cvrA             | FlhDC | MalT  | NhaR  |
| cyaA             | CRP   | CpxR  | FNR   |
| cyaY             | ArgR  | CpxR  | GadE  |
| cybB             | CRP   | FNR   | Fur   |
| cycA             | ArcA  | Fis   | FruR  |
| cydAB            | ArcA  | FruR  | H-NS  |
| cydDC            | NarL  | PhoB  | NtrC  |
| cynTSX           | NarL  | FhlA  | Fur   |
| cyoABCDE         | ArcA  | Fur   | GadE  |
| cysB             | CysB  | CpxR  | FNR   |
| cysDNC           | CysB  | IHF   | CRP   |
| cysE             | CpxR  | ArgR  | CusR  |
| cysJIH           | CysB  | IHF   | CRP   |
| cysK             | CRP   | CysB  | IHF   |
| cysPUWAM         | CysB  | IHF   | CRP   |
| cysQ             | CpxR  | HU    | NtrC  |
| cysS             | CpxR  | FadR  | FruR  |
| cysZ             | ArgR  | FadR  | MetR  |
| cytR             | CytR  | CRP   | FNR   |
| dacA             | Fis   | CRP   | CpxR  |
| dacC             | FNR   | ArcA  | CRP   |
| dacD             | Cbl   | CpxR  | CsgD  |
| dadAX            | CRP   | Lrp   | FNR   |
| dapA-nlpB        | ArgR  | CpxR  | Lrp   |

|                      |       |      |       |
|----------------------|-------|------|-------|
| dapB                 | CRP   | CpxR | Fur   |
| dcm-vsr              | FlhDC | GadE | H-NS  |
| dcp                  | ArcA  | CpxR | Fis   |
| dcrB                 | CRP   | FNR  | Fis   |
| dctA                 | ArcA  | CRP  | DcuR  |
| dcuB-fumB            | NarL  | FNR  | DcuR  |
| dcuC                 | AgaR  | ArcA | FNR   |
| dcuD                 | PhoP  | BaeR | CRP   |
| dcuSR                | NarL  | SoxS | GadX  |
| dcyD-yecSC           | FlhDC | Lrp  | FNR   |
| ddlA                 | AraC  | CpxR | IHF   |
| ddpXABCDF            | NtrC  | ArgR | Lrp   |
| deaD                 | FNR   | Fis  | CRP   |
| def-fmt              | ArgR  | CpxR | H-NS  |
| degP                 | CpxR  | H-NS | CRP   |
| degQS                | Ada   | CsgD | FNR   |
| deoCABD              | CytR  | ModE | DeoR  |
| deoR                 | PhoP  | Nac  | NarL  |
| dfp                  | CRP   | Fis  | FNR   |
| dgkA                 | CpxR  | Fis  | GalR  |
| dgoRKADT             | AgaR  | AppY | AtoC  |
| dgsA-ynfK            | DgsA  | IHF  | NarL  |
| dgt                  | PhoB  | CysB | HcaR  |
| dhaKLM               | DhaR  | CRP  | FNR   |
| dhaR                 | LexA  | ModE | NarL  |
| diaA                 | CpxR  | ArgR | H-NS  |
| dicA                 | CRP   | FNR  | IHF   |
| dicB-ydfDE-insD-intQ | CpxR  | DicA | FlhDC |
| dicC-ydfXW           | ArgR  | FhlA | FlhDC |
| dinB                 | LexA  | ArcA | CRP   |
| dinD                 | CRP   | ArcA | FNR   |
| dinG                 | LexA  | ArcA | CRP   |
| dinI                 | LexA  | ArcA | CRP   |
| dinJ-yafQ            | CRP   | CpxR | FNR   |
| dipZ-yjdC            | SoxS  | CRP  | ChbR  |
| dkgA                 | Fis   | IHF  | CRP   |
| dkgB                 | CsgD  | CysB | GadX  |
| dksA                 | Fis   | CRP  | FNR   |
| dld                  | FNR   | ArcA | ArgR  |
| dmsABC               | ModE  | NarL | FNR   |
| dnaAN-recF           | DnaA  | Fis  | LexA  |
| dnaB                 | CpxR  | GadE | LexA  |
| dnaK-tpke11-dnaJ     | CRP   | rpoH | IHF   |
| dnaQ                 | CpxR  | CysB | FlhDC |
| dnaX                 | Fis   | CpxR | FNR   |
| dpiBA                | AgaR  | AsnC | CsgD  |
| dppABCDF             | FNR   | IHF  | CRP   |
| dps                  | IHF   | OxyR | CRP   |
| dsbB                 | CpxR  | Fis  | Fur   |
| dsbG                 | ArgR  | AscG | GutM  |
| dsdC                 | FlhDC | CpxR | LexA  |
| dsdXA                | FlhDC | CRP  | CpxR  |
| dsrB                 | AlsR  | CpxR | DhaR  |
| dusA                 | rpoH  | CpxR | GadX  |
| dusB-fis             | CRP   | Fis  | IHF   |
| dusC                 | AsnC  | FadR | OmpR  |
| dut-slmA             | FNR   | Lrp  | CRP   |
| dxr                  | CpxR  | Lrp  | Nac   |
| eaeH-insE-1EF-1F-1   | CsgD  | EvgA | HU    |

|                      |       |       |       |
|----------------------|-------|-------|-------|
| eamA                 | CRP   | Fis   | GadE  |
| eamB                 | FNR   | FlhDC | Fur   |
| ebgR                 | BaeR  | GalR  | GalS  |
| eco                  | CRP   | FNR   | Lrp   |
| ecpD-htrE            | GntR  | HU    | IHF   |
| edd-eda              | GntR  | FruR  | PhoB  |
| efeOB                | CRP   | FNR   | Fur   |
| efeU_1U_2            | CRP   | Fur   | GntR  |
| efp                  | CpxR  | Fis   | FNR   |
| elaA                 | CaiF  | CpxR  | DhaR  |
| elaB                 | Fis   | IHF   | Lrp   |
| elaD                 | AgaR  | AllS  | EvgA  |
| elbB-mtgA            | BirA  | CpxR  | CsgD  |
| emrD                 | CpxR  | FruR  | MetJ  |
| emrKY                | EvgA  | AllR  | CpxR  |
| emtA                 | CpxR  | Fis   | Fur   |
| endA                 | CaiF  | Fis   | FruR  |
| entCEBAH             | CRP   | Fur   | IHF   |
| entS                 | Fur   | CRP   | FNR   |
| envR                 | Ada   | CpxR  | Fis   |
| envY-ompT            | CRP   | IHF   | FNR   |
| epd-pgk-fbaA         | FruR  | CRP   | Fis   |
| eptA                 | Cbl   | FlhDC | IHF   |
| eptB                 | CpxR  | FruR  | H-NS  |
| erfK                 | FNR   | Fis   | FruR  |
| essD-ybcS-rzpD       | AllR  | Fur   | AppY  |
| essQ-ydfRQP          | CpxR  | FlhDC | Fur   |
| eutBCLKR             | CpxR  | NarL  | NarP  |
| eutHA                | AgaR  | AllS  | AsnC  |
| eutNEJG              | AgaR  | GntR  | NagC  |
| eutSPQTD             | NagC  | AgaR  | AcrR  |
| evgAS                | EvgA  | AgaR  | BaeR  |
| exbBD                | Fur   | IHF   | CRP   |
| exuR                 | ExuR  | CpxR  | H-NS  |
| exuT                 | ExuR  | FadR  | GadX  |
| fabA                 | FadR  | Fis   | H-NS  |
| fabB                 | FadR  | CRP   | CpxR  |
| fabI                 | FruR  | CpxR  | FNR   |
| fabR-yijD            | CpxR  | Lrp   | NarL  |
| fadBA                | FadR  | ArcA  | Fis   |
| fadD                 | ArcA  | CRP   | FadR  |
| fadE                 | FadR  | ArcA  | ArgR  |
| fadH                 | ArcA  | CRP   | FlhDC |
| fadIJ                | FadR  | ArcA  | CRP   |
| fadL                 | FadR  | OmpR  | PhoP  |
| fadR                 | FlhDC | BaeR  | NagC  |
| fbaB                 | CRP   | FNR   | Fis   |
| fbp                  | CRP   | FNR   | Fis   |
| fdnGHI               | NarL  | NarP  | FNR   |
| fdoGHI-fdhE          | IHF   | CRP   | FNR   |
| fdrA-ylbE_1E_2F-ybcF | AllR  | NagC  | PhoB  |
| feaB                 | FlhDC | GntR  | ModE  |
| feaR                 | CRP   | Fis   | H-NS  |
| fecABCDE             | Fur   | CRP   | FNR   |
| feclR                | CRP   | Fur   | IHF   |
| feoAB                | FNR   | Fur   | CRP   |
| fepA-entD            | CRP   | Fur   | IHF   |
| fepB                 | Fur   | CRP   | CpxR  |
| fepDGC               | Fur   | OxyR  | CpxR  |

|                    |       |      |       |
|--------------------|-------|------|-------|
| fes-ybdZ-entF-fepE | Fur   | CRP  | FNR   |
| ffh                | Fis   | CpxR | FNR   |
| fhuACDB            | Fur   | CRP  | CpxR  |
| fhuE               | CRP   | Fur  | IHF   |
| fhuF               | Fur   | IHF  | CRP   |
| fimAICDFGH         | H-NS  | Lrp  | IHF   |
| fimB               | H-NS  | CRP  | IHF   |
| fimE               | AraC  | CusR | H-NS  |
| fimZ               | CRP   | CpxR | CusR  |
| fiu                | CRP   | Fur  | ArgR  |
| fixABCX            | CaiF  | AllR | NagC  |
| flkI               | FNR   | Fis  | Fur   |
| flkA               | CpxR  | FNR  | Fis   |
| fldA-uof-fur       | SoxS  | FNR  | OxyR  |
| fldB               | SoxS  | CpxR | Nac   |
| flgAMN             | FlhDC | H-NS | CpxR  |
| flgBCDEFGHIJ       | FlhDC | FNR  | H-NS  |
| flgKL              | FlhDC | H-NS | CpxR  |
| flhBAE             | FlhDC | CpxR | H-NS  |
| flhDC              | RcsAB | Fur  | LrhA  |
| fliAZY             | FlhDC | H-NS | CpxR  |
| fliC               | GadE  | H-NS | CpxR  |
| fliDST             | FlhDC | CpxR | FNR   |
| fliE               | FlhDC | AgaR | FNR   |
| fliFGHIJK          | FlhDC | FNR  | H-NS  |
| fliLMNOPQR         | FlhDC | H-NS | FNR   |
| flk                | FadR  | LexA | Nac   |
| flu                | OxyR  | ArcA | FNR   |
| flxA               | FlhDC | H-NS | CpxR  |
| fnr                | FNR   | ArcA | CRP   |
| focA-pflB          | ArcA  | NarL | FNR   |
| folA               | BaeR  | CpxR | Fis   |
| folC-dedD          | AgaR  | ArgR | CRP   |
| folD-ybcJ          | CpxR  | ArgR | CRP   |
| folE-yeiB          | CRP   | FNR  | Fis   |
| folP-glmM          | Fis   | rpoH | EvgA  |
| folX-yfcH          | PhoB  | ArgR | CRP   |
| fpr                | MarA  | SoxS | CRP   |
| frc                | CpxR  | FNR  | H-NS  |
| frdABCD            | NarL  | FNR  | IHF   |
| fre                | NarL  | Fis  | Lrp   |
| friABCDR           | BaeR  | IdnR | RcsAB |
| frmRAB             | CRP   | FadR | IHF   |
| frr                | FNR   | CpxR | Fur   |
| frsA               | CysB  | H-NS | ModE  |
| fruBKA             | FruR  | CRP  | FNR   |
| frvABXR            | AgaR  | NagC | AtoC  |
| frwCB              | AraC  | CaiF | FliA  |
| fryBC-ypdFE-fryA   | AgaR  | NagC | AllR  |
| fsaA               | AgaR  | Cbl  | FlhDC |
| fsr                | ArgR  | CpxR | FlhDC |
| ftnA               | FNR   | IHF  | CRP   |
| ftnB               | CpxR  | ArgR | CRP   |
| ftsB               | FlhDC | ArgR | Fis   |
| ftsK               | LexA  | H-NS | Nac   |
| ftsP               | BaeR  | CpxR | FadR  |
| ftsYEX             | rpoH  | CpxR | FNR   |
| fucAO              | FucR  | Fis  | GntR  |
| fucPIKUR           | FucR  | CRP  | CpxR  |

|                                   |       |       |      |
|-----------------------------------|-------|-------|------|
| fumA                              | ArcA  | CRP   | FNR  |
| fxsA                              | rpoH  | CRP   | GadX |
| gadAXW                            | GadE  | GadX  | TorR |
| gadBC                             | GadE  | GadX  | H-NS |
| gadE-mdtEF                        | FNR   | ArcA  | EvgA |
| galETKM                           | GalR  | GalS  | HU   |
| galF                              | LexA  | CRP   | Fis  |
| galP                              | CRP   | GalR  | GalS |
| galR                              | AraC  | DnaA  | FucR |
| galS                              | GalR  | GalS  | CRP  |
| galU                              | CpxR  | Fis   | FruR |
| gapA-yeaD                         | CRP   | FruR  | IHF  |
| gapC_1C_2                         | CRP   | H-NS  | IHF  |
| garD                              | CRP   | CdaR  | FNR  |
| garPLRK-rnpB                      | CdaR  | FNR   | CRP  |
| gatR_2                            | ArcA  | CRP   | CpxR |
| gatYZABCD                         | ArcA  | CRP   | FNR  |
| gcl-hyi-glxR-ybbVW-allB-ybbY-glxK | AllR  | FruR  | NagC |
| gcvA                              | Fis   | FruR  | IscR |
| gcvR-bcp                          | CRP   | CpxR  | Lrp  |
| gcvTHP                            | Lrp   | PurR  | GcvA |
| gdhA                              | CRP   | Nac   | IHF  |
| gfcA                              | AraC  | Cbl   | CdaR |
| gfcBCD                            | Rob   | CpxR  | NagC |
| gfcE-etp-etk                      | ArgR  | NagC  | AcrR |
| ggt                               | GadE  | GadX  | HcaR |
| ghrA                              | ArgR  | FlhDC | H-NS |
| ghrB                              | FNR   | Fur   | H-NS |
| glcC                              | CRP   | GlcC  | ArcA |
| glcDEFGBA                         | ArcA  | IHF   | GlcC |
| glf-rfc                           | AppY  | ArcA  | CRP  |
| glgBX                             | FNR   | CRP   | IHF  |
| glgCAP                            | CRP   | FNR   | IHF  |
| glgS                              | CRP   | EnvY  | FNR  |
| glk                               | FruR  | CRP   | FNR  |
| glmUS                             | NagC  | CRP   | FNR  |
| glnALG                            | NtrC  | CRP   | Fis  |
| glnB                              | ArgR  | Fis   | GalR |
| glnHPQ                            | IHF   | NtrC  | Fis  |
| glnK-amtB                         | GadX  | NtrC  | IHF  |
| glnS                              | ArcA  | FNR   | Fis  |
| gloA                              | ArcA  | CpxR  | CsgD |
| gloB                              | PhoB  | CpxR  | DnaA |
| glpABC                            | ArcA  | FlhDC | FNR  |
| glpEGR                            | LexA  | Fis   | Nac  |
| glpFKX                            | FNR   | CRP   | IHF  |
| glpTQ                             | CRP   | FNR   | GlpR |
| gltA                              | ArcA  | CRP   | IHF  |
| gltBDF                            | ArgR  | Nac   | GadE |
| gltl-sroC-gltJKL                  | FlhDC | NtrC  | AraC |
| gltP                              | Cbl   | Lacl  | LexA |
| gltS                              | CpxR  | GntR  | IHF  |
| gltX                              | Fis   | CRP   | FNR  |
| glvCBG-ysdC                       | GntR  | IdnR  | NtrC |
| glyA                              | MetR  | PurR  | CRP  |
| glyQS                             | CpxR  | FNR   | rpoH |
| gmhB                              | AgaR  | NagC  | NarL |
| gmk                               | CpxR  | LexA  | Fis  |
| gmr                               | Fur   | NtrC  | CpxR |



|                           |       |      |        |
|---------------------------|-------|------|--------|
| gnd                       | GadE  | Fis  | IHF    |
| gnsB                      | CRP   | FNR  | IHF    |
| gntP                      | UxuR  | AgaR | CRP    |
| gntRKU                    | GntR  | IdnR | CRP    |
| gntT                      | CRP   | GntR | FliHDC |
| gntXY                     | CRP   | GntR | IscR   |
| gor                       | OxyR  | FliA | GntR   |
| gpmA                      | Fur   | CRP  | FNR    |
| gpmM-envC-yibQ            | LexA  | ArgR | Fis    |
| gpp                       | ArgR  | CpxR | IscR   |
| gpt                       | Fis   | CRP  | FNR    |
| greA                      | FNR   | Fis  | IHF    |
| groSL                     | CRP   | IHF  | rpoH   |
| grpE                      | CRP   | rpoH | Fis    |
| grxA                      | OxyR  | CRP  | FNR    |
| grxB                      | ArcA  | CRP  | CpxR   |
| grxC                      | CsgD  | Fis  | LexA   |
| grxD                      | CRP   | H-NS | HU     |
| gshA                      | H-NS  | CpxR | FNR    |
| gsk                       | rpoH  | Fis  | H-NS   |
| gsp                       | ArcA  | FNR  | H-NS   |
| gspCDEFGHIJKLMO           | H-NS  | GntR | AgaR   |
| gst                       | ArcA  | IHF  | CRP    |
| guaBA                     | Fis   | PurR | DnaA   |
| guaC                      | ArgR  | CpxR | FNR    |
| gudPXD                    | AgaR  | DeoR | EvgA   |
| gyrA                      | CRP   | Fis  | Lrp    |
| gyrB                      | CpxR  | Fis  | LexA   |
| hcaEFCBD                  | RcsAB | HcaR | PhoB   |
| hcaR                      | Fis   | CRP  | DnaA   |
| hcaT                      | AgaR  | ChbR | EvgA   |
| hchA                      | CRP   | FNR  | Fis    |
| hcp-hcr                   | NarP  | AtoC | FliHDC |
| hdeAB-yhiD                | MarA  | GadE | TorR   |
| hdeD                      | GadE  | GadX | H-NS   |
| helD                      | AgaR  | DicA | DnaA   |
| hemA-prfA-prmC            | ArcA  | FNR  | IHF    |
| hemB                      | rpoH  | CpxR | Fis    |
| hemCDXY                   | NagC  | rpoH | AlIS   |
| hemH                      | OxyR  | IclR | MetJ   |
| hemL                      | PhoP  | ArgR | CdaR   |
| hemN                      | CpxR  | ArgR | H-NS   |
| hepA-rluA                 | PurR  | CRP  | IHF    |
| hflD-purB                 | PurR  | CRP  | FNR    |
| hinT-ycfLM-thiK-nagZ-ycfP | CpxR  | PhoB | CRP    |
| hipBA                     | CpxR  | IHF  | CsgD   |
| hisLGDCBHAFI              | IHF   | CRP  | Lrp    |
| hisS                      | ArgR  | CpxR | FNR    |
| hmp                       | AgaR  | AsnC | FNR    |
| hns                       | Fis   | GadX | H-NS   |
| hofMNOP                   | AgaR  | AlsR | ArgR   |
| hofQ                      | AlIS  | CysB | DeoR   |
| holC-valS                 | CpxR  | IHF  | rpoH   |
| holD-rimI-yjjG            | Fis   | LexA | CpxR   |
| holE                      | H-NS  | CRP  | Fis    |
| hpt                       | CpxR  | DgsA | Fis    |
| hrpA                      | EnvY  | GutM | GutR   |
| hscBA-fdx-iscX            | FNR   | IHF  | IscR   |
| hscC                      | AgaR  | DeoR | DgsA   |

|                          |      |       |      |
|--------------------------|------|-------|------|
| hsdRMS                   | CRP  | CpxR  | Fis  |
| hslJ                     | CysB | CRP   | IHF  |
| hslVU                    | CRP  | rpoH  | Fis  |
| hspQ                     | H-NS | rpoH  | CRP  |
| htgA                     | rpoH | FNR   | IHF  |
| htpG                     | CRP  | IHF   | rpoH |
| htpX                     | IHF  | rpoH  | CRP  |
| htrG-cca                 | CpxR | AllR  | ArcA |
| htrL                     | CRP  | ArcA  | CpxR |
| hupA                     | CRP  | Fis   | CpxR |
| hupB                     | CRP  | EnvY  | Fis  |
| hyaABCDEF                | NarP | IscR  | NarL |
| hybOABCDEFGF             | NarL | ArcA  | NarP |
| hycABCDEFGHI             | FhlA | ModE  | IHF  |
| hydN-hypF                | FhlA | HyfR  | LsrR |
| hyfABCDEFGHIJR-focB      | FhlA | HyfR  | AgaR |
| hypABCDE-fhlA            | FhlA | IHF   | FNR  |
| hyuA                     | FadR | GntR  | MngR |
| iaaA-gsiABCD             | IHF  | CRP   | CysB |
| iap                      | CpxR | DnaA  | FhlA |
| ibpAB                    | IHF  | rpoH  | CRP  |
| icd                      | ArcA | CRP   | FruR |
| iclR                     | CpxR | FadR  | IclR |
| idi                      | CpxR | DeoR  | FNR  |
| idnDOTR                  | GntR | IdnR  | NagC |
| idnK                     | GntR | DgsA  | IdnR |
| ilvC                     | CRP  | IHF   | Lrp  |
| ilvIH                    | Lrp  | H-NS  | ArgR |
| ilvLG_1G_2MEDA           | Lrp  | IHF   | CRP  |
| ilvY                     | CpxR | Fur   | H-NS |
| imp-surA-pdxA-ksgA-apaGH | Fis  | H-NS  | LexA |
| inaA                     | MarA | Rob   | BetI |
| infA                     | CRP  | FNR   | Fis  |
| insA-1AB-1B-1            | Fis  | CRP   | CpxR |
| insA-2AB-2B-2-afuBC      | AgaR | AllR  | AppY |
| insA-5AB-5B-5            | AgaR | CRP   | CpxR |
| insA-7                   | CpxR | Fis   | H-NS |
| insC-1CD-1D-1            | ArcA | CRP   | CpxR |
| insC-2CD-2D-2            | CRP  | CpxR  | DicA |
| insC-4CD-4D-4-ygeONM     | FNR  | ArcA  | CRP  |
| insC-5CD-5D-5-yqiGHI     | CytR | GntR  | IHF  |
| insE-2EF-2F-2            | CRP  | FNR   | ArcA |
| insE-4EF-4F-4            | CRP  | DicA  | FNR  |
| insG                     | CaiF | CpxR  | MarA |
| insH-5                   | LexA | ArgR  | CytR |
| insH-8                   | CRP  | CytR  | H-NS |
| insL-1                   | CRP  | IHF   | ArcA |
| insMI-3                  | CRP  | FNR   | H-NS |
| insN-1I-1O-1             | BetI | FihDC | NanR |
| insO-2-yjhWV             | AgaR | AraC  | AscG |
| intA                     | CRP  | FihDC | GntR |
| intB                     | AllS | ArcA  | CRP  |
| intD                     | CpxR | NarL  | PhoB |
| intF                     | CRP  | Cbl   | EvgA |
| intS                     | GntR | IdnR  | LsrR |
| intZ                     | AllR | ArcA  | CRP  |
| iraP                     | CRP  | IHF   | ArcA |
| iscRSUA                  | IscR | CRP   | FNR  |
| ispB                     | NagC | ArgR  | CpxR |

|                              |      |        |        |
|------------------------------|------|--------|--------|
| ispDF                        | CpxR | CysB   | FliHDC |
| ispG                         | rpoH | ArgR   | CpxR   |
| ispU                         | CRP  | Fis    | H-NS   |
| ivbL-ilvBN                   | CRP  | IHF    | FNR    |
| ivy                          | CRP  | IHF    | FNR    |
| katE                         | CRP  | IHF    | H-NS   |
| katG                         | FNR  | OxyR   | GadE   |
| kbaZ-agaVWA                  | AgaR | EvgA   | AllR   |
| kbl-tdh                      | Lrp  | CRP    | Fis    |
| kch                          | CRP  | CpxR   | DicA   |
| kdgK                         | FruR | ArcA   | CRP    |
| kdgR                         | CRP  | CpxR   | FNR    |
| kdgT                         | ArcA | CRP    | CpxR   |
| kdpDE                        | ArgR | CaiF   | CpxR   |
| kdpFABC                      | ModE | IHF    | NtrC   |
| kdsC-yrbK                    | CpxR | Fis    | H-NS   |
| kduD                         | FadR | FruR   | HU     |
| kduI                         | FadR | FruR   | Fur    |
| kefFC                        | AgaR | AtoC   | DgsA   |
| kefGB-yheV                   | PhoB | AscG   | Cbl    |
| kgtP                         | ArcA | CRP    | FNR    |
| kilR-ydaE                    | CsgD | FliHDC | GntR   |
| kptA                         | CpxR | CytR   | DeoR   |
| kup                          | AsnC | CpxR   | FadR   |
| lacZYA                       | CRP  | H-NS   | Fis    |
| ldcA                         | FNR  | Fis    | FruR   |
| ldcC                         | NtrC | AppY   | Lrp    |
| ldhA                         | IHF  | rpoH   | CRP    |
| lepAB                        | FNR  | Fis    | SoxS   |
| leuE                         | ArgR | CRP    | CysB   |
| leuLABCD                     | CRP  | Lrp    | IHF    |
| leuO                         | CpxR | CytR   | GntR   |
| leuS-rlpB-holA-nadD-cobC     | FNR  | ModE   | PhoP   |
| lexA-dinF                    | LexA | CRP    | ArcA   |
| lgt-thyA                     | CpxR | rpoH   | Fis    |
| ligA-ypeB                    | PhoB | FliHDC | GntR   |
| ligT                         | ArgP | AscG   | CaiF   |
| lipA                         | CRP  | FNR    | FruR   |
| lit                          | CpxR | CRP    | CaiF   |
| livJ                         | CRP  | IHF    | Lrp    |
| livKHMFG                     | Lrp  | IHF    | CRP    |
| lldPRD                       | ArcA | PdhR   | CRP    |
| lolA-rarA                    | Fis  | H-NS   | LexA   |
| lolB-ispE-prs                | CpxR | CusR   | CynR   |
| lolCDE                       | PhoP | CpxR   | NarL   |
| lomR_2-stfR-tfaR             | ArgR | AllR   | CpxR   |
| lpcA                         | CRP  | CpxR   | Fis    |
| lpp                          | CpxR | CRP    | FNR    |
| lptAB-rpoN-hpf-ptsN-yhbJ-npr | rpoH | CpxR   | Lrp    |
| lpxL                         | PhoB | ArgR   | FruR   |
| lpxM                         | EvgA | H-NS   | HU     |
| lpxP                         | CRP  | FNR    | Fis    |
| lrrA                         | CRP  | FNR    | GntR   |
| lsrACDBFG                    | CRP  | FNR    | LsrR   |
| lsrK                         | CRP  | FNR    | Fis    |
| lsrR                         | CRP  | ArcA   | FNR    |
| luxS                         | Fis  | CpxR   | FruR   |
| lysA                         | Lrp  | ArgR   | CRP    |
| lysC                         | CRP  | Lrp    | ArgR   |

|                                        |       |       |       |
|----------------------------------------|-------|-------|-------|
| lysP                                   | CRP   | ArcA  | FNR   |
| lysU                                   | FNR   | Lrp   | CRP   |
| maa                                    | CRP   | CpxR  | Fis   |
| macAB                                  | rpoH  | ChbR  | CpxR  |
| maeA                                   | FruR  | Fis   | GalR  |
| maeB                                   | CRP   | IHF   | ArcA  |
| mak                                    | CpxR  | H-NS  | LsrR  |
| malEFG                                 | CRP   | MalT  | FNR   |
| mall                                   | AraC  | AscG  | GatR  |
| malK-lamB-malM                         | CRP   | MalT  | FNR   |
| malPQ                                  | FNR   | MalT  | CRP   |
| malT                                   | CRP   | DgsA  | Lrp   |
| malXY                                  | CRP   | FihDC | IHF   |
| manA                                   | SoxS  | FruR  | MarA  |
| manXYZ                                 | CRP   | DgsA  | NagC  |
| maoC                                   | ArgR  | FhlA  | MngR  |
| map-glnD-dapD                          | CpxR  | CRP   | FNR   |
| marC                                   | Cbl   | CdaR  | MetR  |
| marRAB                                 | MarA  | Rob   | SoxS  |
| matA                                   | FNR   | IHF   | LexA  |
| matB                                   | CRP   | H-NS  | IHF   |
| matC-yagXWV                            | AllR  | FihDC | NagC  |
| mcrA                                   | ArgR  | AscG  | FihDC |
| mcrBC                                  | CRP   | CpxR  | Fis   |
| mdh                                    | ArcA  | CRP   | FihDC |
| mdlAB                                  | AtoC  | BetI  | CaiF  |
| mdoC                                   | ArcA  | CytR  | Fis   |
| mdoGH                                  | Fis   | FNR   | IHF   |
| mdtABCD-baeSR                          | BaeR  | CpxR  | NagC  |
| mdtG                                   | SoxS  | CdaR  | CytR  |
| mdtH                                   | AgaR  | CsgD  | CytR  |
| mdtJl                                  | CRP   | Fis   | IHF   |
| mdtK                                   | Rob   | SoxS  | CpxR  |
| mdtM-yjiN                              | BaeR  | CsgD  | FhlA  |
| mdtNOP                                 | AgaR  | AllR  | CsgD  |
| mdtQ                                   | CusR  | FihDC | GntR  |
| melAB                                  | CRP   | Fis   | H-NS  |
| melR                                   | CRP   | FNR   | Fis   |
| menA-rraA                              | Fis   | PhoB  | AgaR  |
| menFD-yfbB-menBCE                      | CpxR  | FNR   | FhlA  |
| metA                                   | MetJ  | MetR  | rpoH  |
| metBL                                  | MetJ  | PhoP  | AllR  |
| metC                                   | MetJ  | CRP   | Nac   |
| metE                                   | CRP   | MetJ  | MetR  |
| metF                                   | CRP   | MetJ  | PhoP  |
| metG                                   | ArcA  | FNR   | Fis   |
| metH                                   | MetR  | Fur   | Lrp   |
| metJ                                   | Fur   | IHF   | Lrp   |
| metK                                   | CRP   | FNR   | MetJ  |
| metNIQ                                 | MetJ  | CRP   | IHF   |
| metR                                   | MetJ  | CsgD  | GadW  |
| metY-yhbC-nusA-infB-rbfA-truB-rpsO-pnp | ArgR  | Fis   | CRP   |
| mfd                                    | FihDC | H-NS  | NagC  |
| mgIBAC                                 | FihDC | GalR  | GalS  |
| mgsA                                   | CRP   | FNR   | GlpR  |
| mgtA                                   | CRP   | FNR   | PhoP  |
| mhpABCDE                               | MhpR  | NagC  | AllR  |
| mhpR-lacI                              | CRP   | NtrC  | AraC  |
| mhpT                                   | GntR  | NagC  | OxyR  |

|                                                         |       |       |       |
|---------------------------------------------------------|-------|-------|-------|
| miaB                                                    | LexA  | Fis   | MalT  |
| minCDE                                                  | H-NS  | CRP   | CpxR  |
| mipA                                                    | CRP   | FNR   | ArcA  |
| mlrA                                                    | CpxR  | MarA  | NtrC  |
| mltA                                                    | ArgR  | FlhDC | Fur   |
| mltB                                                    | CpxR  | FNR   | Fis   |
| mltD                                                    | CRP   | FNR   | Fis   |
| mmuPM                                                   | ArgR  | MetJ  | OmpR  |
| mngAB                                                   | AtoC  | EnvY  | FadR  |
| mngR                                                    | AraC  | ArgR  | IclR  |
| mnmA                                                    | CpxR  | FNR   | Fis   |
| mnmC                                                    | Cbl   | ChbR  | IclR  |
| mnmE                                                    | rpoH  | GntR  | NagC  |
| mntH                                                    | CRP   | Fur   | IHF   |
| mntR-ybiR                                               | BetI  | CusR  | FadR  |
| moaABCDE                                                | ModE  | CueR  | FNR   |
| mobAB                                                   | CpxR  | AgaR  | CRP   |
| modABC                                                  | ModE  | CRP   | IHF   |
| modEF                                                   | Fur   | CRP   | CpxR  |
| moeAB                                                   | NarL  | ArgR  | DicA  |
| mokB                                                    | ArcA  | CRP   | CpxR  |
| mokC-hokC                                               | AgaR  | AscG  | FNR   |
| molR_2                                                  | RcsAB | LexA  | NagC  |
| molR_3-yehI                                             | NagC  | AllR  | CusR  |
| motAB-cheAW                                             | CpxR  | FlhDC | FNR   |
| mpl                                                     | LexA  | AgaR  | CRP   |
| mppA                                                    | FlhDC | CRP   | FNR   |
| mprA-emrAB                                              | FNR   | CRP   | IHF   |
| mqq                                                     | CRP   | ArcA  | FNR   |
| mqsR-ygiT                                               | FNR   | IHF   | CRP   |
| mraZW-ftsLI-murEF-mraY-murD-ftsW-murGC-ddIB-ftsQAZ-lpxC | CpxR  | FlhDC | RcsAB |
| mreBCD                                                  | FlhDC | Fis   | CRP   |
| mrp                                                     | FNR   | IHF   | NagC  |
| mrr                                                     | AraC  | CpxR  | IclR  |
| mscS                                                    | CRP   | FNR   | H-NS  |
| msrA                                                    | CRP   | FNR   | FadR  |
| msrB                                                    | ArcA  | CRP   | FNR   |
| msyB                                                    | IHF   | CRP   | FNR   |
| mtfA                                                    | FNR   | CRP   | CpxR  |
| mtlADR                                                  | Fis   | FruR  | CRP   |
| mtn-btuF-yadS                                           | DcuR  | EnvY  | EvgA  |
| mtr                                                     | CaiF  | CdaR  | FhIA  |
| mug                                                     | CpxR  | FNR   | FlhDC |
| murA                                                    | FNR   | CRP   | CpxR  |
| murB-birA                                               | H-NS  | Fis   | FlhDC |
| murQP-yfeW                                              | AgaR  | PhoB  | AllR  |
| mutH                                                    | CsgD  | HyfR  | MetR  |
| mutS                                                    | AppY  | AsnC  | FlhDC |
| mutY-yggX-mltC-nupG                                     | CpxR  | CytR  | Fis   |
| nac                                                     | Nac   | NtrC  | ArcA  |
| nadA-pnuC                                               | CRP   | IHF   | FNR   |
| nadB                                                    | CRP   | IHF   | ModE  |
| nadC                                                    | HU    | LexA  | PhoB  |
| nadE                                                    | CpxR  | CRP   | FruR  |
| nagBACD                                                 | NagC  | PhoP  | CRP   |
| nagE                                                    | CRP   | NagC  | ArcA  |
| nagK-cobB                                               | LexA  | MarA  | Rob   |
| nanATEK-yhcH                                            | NanR  | CRP   | FNR   |
| nanCM                                                   | NagC  | NanR  | CRP   |

|                           |       |       |       |
|---------------------------|-------|-------|-------|
| nanR                      | SoxS  | DicA  | NagC  |
| napFDAGHBC-ccmABCDEFGH    | NarP  | ModE  | NarL  |
| narGHJI                   | IHF   | NarL  | FNR   |
| narK                      | FNR   | IHF   | NarL  |
| narP                      | FlhDC | Fur   | IHF   |
| narQ                      | ArgR  | GadX  | HyfR  |
| narU                      | RcsAB | ArgR  | CsgD  |
| narXL                     | ModE  | CRP   | CdaR  |
| narZYWV                   | ArgR  | NarP  | RcsAB |
| ndh                       | ArcA  | Fis   | FNR   |
| ndk                       | CRP   | Fis   | FNR   |
| nemA                      | AraC  | CRP   | Cbl   |
| nfo                       | MarA  | Rob   | SoxS  |
| nfrBA                     | FlhDC | NtrC  | ArgR  |
| nfsB                      | MarA  | CRP   | CpxR  |
| nhaAR                     | H-NS  | Fis   | BirA  |
| nhaB                      | CpxR  | Fis   | H-NS  |
| nhoA                      | NtrC  | CRP   | LexA  |
| nikABCDEF                 | NikR  | NarL  | FNR   |
| nirBDC-cysG               | NarP  | FruR  | NarL  |
| nlpA                      | CRP   | IHF   | H-NS  |
| nlpC                      | CpxR  | Fis   | IHF   |
| nlpD-rpoS                 | CRP   | ArcA  | GadX  |
| nlpI                      | FNR   | CRP   | Fis   |
| nmpC                      | CRP   | IHF   | OmpR  |
| nohA-ydfN-tfaQ            | Fur   | CRP   | CpxR  |
| norR                      | AgaR  | AtoC  | CysB  |
| norVW                     | AgaR  | CusR  | GntR  |
| nrdAB                     | DnaA  | Fis   | CRP   |
| nrdDG                     | FNR   | CRP   | IHF   |
| nrdHIEF                   | Fur   | IHF   | CRP   |
| nrdR-ribDE-nusB-thiL-pgpA | Fis   | CpxR  | FruR  |
| nrfABCDEFG                | NarP  | FlhDC | NarL  |
| nsrR-rnr-rlmB             | CpxR  | OxyR  | AgaR  |
| nudB-yebC-ruvC            | Fis   | PurR  | ArgR  |
| nudE                      | CRP   | Fis   | FruR  |
| nudF-yqiB-cpdA-yqiA-parE  | CpxR  | FlhDC | Fis   |
| nudG                      | DeoR  | FadR  | ModE  |
| nudI                      | CpxR  | IHF   | OxyR  |
| nuoABCEFGHIJKLMN          | Fis   | NarL  | IHF   |
| nupC                      | CytR  | Nac   | CRP   |
| nupX                      | AgaR  | CsgD  | FadR  |
| ogrK                      | CpxR  | Fis   | H-NS  |
| ompA                      | CRP   | ArcA  | CpxR  |
| ompC                      | Lrp   | OmpR  | CpxR  |
| ompF                      | Lrp   | OmpR  | CpxR  |
| ompG                      | CRP   | ModE  | NagC  |
| ompL                      | AgaR  | Fis   | H-NS  |
| ompN                      | CpxR  | FlhDC | GalR  |
| ompR-envZ                 | ArgR  | UxuR  | CpxR  |
| ompW                      | ArcA  | FNR   | CRP   |
| ompX                      | CRP   | FNR   | IHF   |
| oppABCDF                  | ArcA  | Lrp   | ModE  |
| orn                       | ChbR  | DeoR  | GalR  |
| osmB                      | CRP   | RcsAB | H-NS  |
| osmC                      | Lrp   | RcsAB | H-NS  |
| osmE                      | Fis   | IHF   | CRP   |
| osmF-yehYXW               | ArgR  | GntR  | MprA  |
| osmY                      | CRP   | IHF   | Lrp   |

|                         |       |       |       |
|-------------------------|-------|-------|-------|
| otsBA                   | IHF   | SoxS  | H-NS  |
| oxc                     | AgaR  | CpxR  | GadE  |
| oxyR                    | OxyR  | FruR  | Fur   |
| paaABCDEFGHIJK          | FlhDC | PaaX  | ArgR  |
| paaXY                   | FlhDC | CpxR  | EvgA  |
| pabB-nudL               | CpxR  | FlhDC | GutM  |
| pabC-yceG-tmk-holB-ycfH | Fis   | CpxR  | LexA  |
| pagB                    | Lacl  | MarA  | MarR  |
| pagP                    | PhoB  | PhoP  | ArgR  |
| panBC                   | CpxR  | FNR   | CRP   |
| panD                    | CRP   | CpxR  | Fis   |
| panE-yajL               | CpxR  | Fur   | MarA  |
| parC                    | ArgR  | CpxR  | FNR   |
| pck                     | CRP   | FruR  | FNR   |
| pcnB-folK               | FNR   | CRP   | CysB  |
| pdhR-aceEF-lpd          | FNR   | ArcA  | CRP   |
| pdxB-usg-truA-dedA      | Fis   | HU    | LexA  |
| pdxH-tyrS-pdxY          | FNR   | FruR  | rpoH  |
| pdxK                    | SoxS  | CaiF  | Nac   |
| pepA                    | CRP   | CpxR  | FNR   |
| pepD                    | CsgD  | FNR   | Fis   |
| pepE                    | Cbl   | CsgD  | FNR   |
| pepN                    | CRP   | CpxR  | Fis   |
| pepQ-yigZ-trkH-hemG     | ArgR  | CpxR  | NagC  |
| pepT                    | ArcA  | CRP   | FNR   |
| perR                    | AscG  | DsdC  | FlhDC |
| pfkA                    | FruR  | FNR   | Fis   |
| pfkB                    | CRP   | FNR   | IHF   |
| pflA                    | CRP   | FNR   | Fis   |
| pflDC                   | AgaR  | GntR  | AllR  |
| pgaABCD                 | CpxR  | NhaR  | CRP   |
| pgi                     | CRP   | FNR   | Fis   |
| pgl                     | IHF   | FNR   | H-NS  |
| pgpB                    | HyfR  | LexA  | NikR  |
| pgsA                    | AraC  | H-NS  | IclR  |
| pheLA                   | CRP   | IHF   | FNR   |
| pheP                    | DgsA  | FadR  | NtrC  |
| phnCDEFGHIJKLMNOP       | PhoB  | AgaR  | AllR  |
| phoA-psiF               | PhoB  | FNR   | CRP   |
| phoBR                   | PhoB  | DhaR  | FNR   |
| phoE                    | PhoB  | AllR  | ArgR  |
| phoH                    | CRP   | PhoB  | Fis   |
| phoPQ                   | PhoP  | FNR   | PhoB  |
| pinR                    | CRP   | H-NS  | FNR   |
| pitA                    | Fis   | ArgR  | FNR   |
| pldA                    | rpoH  | ArgR  | FlhDC |
| pldB-yigL               | CpxR  | SoxS  | FadR  |
| plsB                    | CpxR  | Fis   | FlhDC |
| plsC                    | ArgR  | CaiF  | CytR  |
| pmbA                    | ArgR  | FlhDC | LexA  |
| pmrD                    | CRP   | FNR   | FlhDC |
| pncB                    | CRP   | CpxR  | Fis   |
| pntAB                   | CRP   | Lrp   | IHF   |
| polA                    | CpxR  | DnaA  | H-NS  |
| polB                    | LexA  | ArcA  | CRP   |
| potABCD                 | CRP   | Fis   | FNR   |
| potFGHI                 | NtrC  | ArgR  | Nac   |
| poxA                    | ArgR  | CysB  | HU    |
| poxB-ltaE-ybjT          | CpxR  | MarA  | OxyR  |

|                       |      |       |      |
|-----------------------|------|-------|------|
| ppa                   | CRP  | Fis   | CpxR |
| ppc                   | CRP  | IHF   | FNR  |
| ppdAB-ygdB-ppdC-recC  | AgaR | Cbl   | GntR |
| ppdD-hofBC            | rpoH | CsgD  | DeoR |
| pphA                  | rpoH | ArgR  | OxyR |
| pphB                  | CpxR | LexA  | NagC |
| ppiA                  | CpxR | CytR  | Fis  |
| ppiB-lpxH             | CpxR | Fis   | CRP  |
| ppiC                  | CpxR | FNR   | GadE |
| ppiD                  | CpxR | rpoH  | HU   |
| ppk-ppx               | CpxR | Lrp   | DhaR |
| pppA                  | Fis  | FruR  | IscR |
| pps                   | CRP  | FruR  | ArcA |
| pptA                  | CRP  | FNR   | FruR |
| pqiAB                 | MarA | SoxS  | Fis  |
| prfC                  | Fis  | CRP   | FNR  |
| priA                  | ChbR | DcuR  | FadR |
| priC-ybaM             | Cbl  | AgaR  | LsrR |
| prkB                  | AgaR | ExuR  | KdpE |
| priC-yhiQ             | rpoH | CRP   | Fis  |
| prmB-aroC-mepA-yfcAML | CpxR | FlhDC | rpoH |
| proBA                 | rpoH | AllS  | AraC |
| proC                  | CytR | FucR  | LexA |
| proP                  | CRP  | Fis   | ArcA |
| proQ-prc              | Fis  | CRP   | ExuR |
| proS                  | CRP  | CpxR  | FNR  |
| proVWX                | H-NS | CRP   | ArcA |
| prpBCDE               | CRP  | Fis   | PrpR |
| prpR                  | AllR | NtrC  | PhoB |
| psd-yjeP              | CpxR | AsnC  | FadR |
| pspABCDE              | PspF | IHF   | CRP  |
| pspF                  | PspF | DicA  | LrhA |
| psrN-alx              | ArcA | CRP   | CpxR |
| pssA                  | ArcA | CRP   | Fis  |
| pstSCAB-phoU          | PhoB | FNR   | IHF  |
| pth-ychF              | Fis  | CRP   | Lrp  |
| ptrA-recBD            | Fis  | AcrR  | AsnC |
| ptrB                  | NagC | BaeR  | CpxR |
| ptsA-fsaB-gldA        | NarL | FlhDC | AllS |
| ptsG                  | ArcA | DgsA  | CRP  |
| ptsHI-crr             | FruR | CRP   | DgsA |
| purA                  | GadE | MarA  | PurR |
| purC                  | CRP  | PurR  | FNR  |
| purEK                 | PurR | PhoP  | Lrp  |
| purHD                 | PhoP | PurR  | FNR  |
| purL                  | PhoP | PurR  | CRP  |
| purR                  | Fur  | Lrp   | PhoB |
| purT                  | CRP  | FNR   | IHF  |
| purU                  | ArcA | CRP   | FNR  |
| putP                  | CRP  | IHF   | FNR  |
| puuA                  | IHF  | CRP   | FNR  |
| puuCBE                | IHF  | FNR   | NtrC |
| puuDR                 | NtrC | IHF   | PhoB |
| puuP                  | CRP  | CpxR  | Fur  |
| pykA                  | NarL | FNR   | Fur  |
| pykF                  | CRP  | FruR  | Fis  |
| pyrC                  | PurR | ArgR  | CRP  |
| pyrD                  | FNR  | IHF   | PurR |
| pyrG-eno              | FNR  | ArcA  | CRP  |



|                                        |       |       |       |
|----------------------------------------|-------|-------|-------|
| pyrH                                   | FNR   | ArgR  | CRP   |
| pyrLBI                                 | IHF   | FNR   | PurR  |
| qmcA-ybbJ                              | CpxR  | Fis   | PhoB  |
| qor                                    | CRP   | FNR   | Fis   |
| qseBC                                  | QseB  | CysB  | NarL  |
| queA                                   | Fis   | ArcA  | CRP   |
| queC                                   | GntR  | HU    | MetJ  |
| racC                                   | AraC  | CdaR  | CpxR  |
| racR                                   | CRP   | FNR   | Fis   |
| raiA                                   | CRP   | IHF   | FNR   |
| rarD                                   | DhaR  | GntR  | NarP  |
| ravA-viaA                              | FruR  | BaeR  | CpxR  |
| rbn                                    | FhlA  | GlpR  | GntR  |
| rbsDACBKR                              | CRP   | RbsR  | FNR   |
| rcnA                                   | FlhDC | GntR  | MetR  |
| rcnR                                   | AscG  | Cbl   | NagC  |
| rcaA                                   | GadE  | RcsAB | FlhDC |
| rcaC                                   | PhoB  | PhoP  | H-NS  |
| rcaDB                                  | FlhDC | CpxR  | ArgR  |
| rcaF-yaeB                              | Fis   | CRP   | CpxR  |
| rdgC                                   | CpxR  | FNR   | Fur   |
| rdoA-dsbA                              | CpxR  | FNR   | H-NS  |
| recAX                                  | LexA  | ArcA  | CRP   |
| recET-lar-ydaCQ-intR                   | rpoH  | AlIR  | ArgR  |
| recN                                   | ArcA  | LexA  | CRP   |
| recQ                                   | FlhDC | LexA  | OmpR  |
| relA-chpRA-mazG                        | H-NS  | CpxR  | Fis   |
| relBE-hokD                             | CRP   | IHF   | FNR   |
| rep                                    | CRP   | Fis   | IHF   |
| rfaDFCL                                | rpoH  | CpxR  | Fis   |
| rfaE                                   | rpoH  | ArgR  | DeoR  |
| rfaH                                   | Fis   | FruR  | GadX  |
| rfaQGSPBIJYZ-waaU                      | rpoH  | CpxR  | CRP   |
| rfaBDACX                               | CRP   | IHF   | FNR   |
| rfe-wzzE-rffEDGHCA-wzxE-rffT-wzyE-rffM | FlhDC | Fis   | CpxR  |
| rhaBAD                                 | NagC  | AgaR  | AlIR  |
| rhaSR                                  | AgaR  | Cbl   | FhlA  |
| rhaT                                   | AgaR  | CysB  | FhlA  |
| rhIB                                   | CpxR  | ArgR  | FNR   |
| rhIE                                   | CRP   | Fis   | FlhDC |
| rhoL-rho                               | CRP   | CpxR  | Fis   |
| rhsB                                   | CpxR  | Fis   | H-NS  |
| rhcC-ybfB                              | Cbl   | CpxR  | FNR   |
| rhdD-ybbC-ybhH-ybbD                    | CpxR  | Lrp   | PhoB  |
| rheE-ydcD                              | CRP   | CpxR  | FNR   |
| rhtA                                   | ExuR  | FadR  | IdnR  |
| rhtB                                   | AgaR  | ArgR  | CdaR  |
| rhtC                                   | AgaR  | FlhDC | FruR  |
| ribA                                   | SoxS  | DeoR  | FNR   |
| ribB                                   | CRP   | FNR   | FruR  |
| ribF-ileS-lspA-fkpB-ispH               | ArgR  | CpxR  | GadE  |
| rihA                                   | CRP   | FNR   | FlhDC |
| rihC                                   | CRP   | FNR   | GalR  |
| rimJ                                   | CpxR  | CRP   | FNR   |
| rimL                                   | CRP   | DgsA  | DicA  |
| rimF                                   | ArgR  | CysB  | FadR  |
| rimG                                   | CRP   | CpxR  | FadR  |
| rimL-uup                               | Fis   | FNR   | H-NS  |
| rimN                                   | Fis   | rpoH  | ArcA  |

|                                             |        |        |        |
|---------------------------------------------|--------|--------|--------|
| rluB                                        | CytR   | DeoR   | Fis    |
| rluC                                        | Fis    | Fur    | HU     |
| rluD-yfiH                                   | ArgR   | BaeR   | CaiF   |
| rluE-nudJ                                   | PurR   | AsnC   | Cbl    |
| rluF                                        | ArgR   | MarA   | PhoB   |
| rmf                                         | ArcA   | CRP    | Fis    |
| rmuC                                        | CRP    | FNR    | ArcA   |
| rna                                         | CpxR   | Fis    | PhoP   |
| rnb                                         | CRP    | FNR    | Fis    |
| rnc-era-recO-pdxJ-acpS                      | FliHDC | CpxR   | Fis    |
| rnd                                         | FadR   | IclR   | LexA   |
| rnhA                                        | ArgR   | EvgA   | IldnR  |
| rnk                                         | CpxR   | DcuR   | FliHDC |
| rnlA-yfiO                                   | AllR   | CRP    | IHF    |
| rnt-lhr                                     | AsnC   | FadR   | GntR   |
| rob                                         | MarA   | CpxR   | Fur    |
| rph-pyrE                                    | FNR    | Fis    | RcsAB  |
| rpiA                                        | rpoH   | CpxR   | FadR   |
| rpiR-alsBACE                                | AgaR   | GntR   | NagC   |
| rplKAJL-rpoBC                               | FNR    | Fis    | ArcA   |
| rplM-rpsI                                   | ArcA   | FNR    | Fis    |
| rplNXE-rpsNH-rplFR-rpsE-rpmD-rplO-secY-rpmJ | FNR    | ArcA   | Fis    |
| rplU-rpmA                                   | FNR    | Fis    | ArcA   |
| rplY                                        | CRP    | Fis    | FNR    |
| rpmE                                        | CRP    | CpxR   | FNR    |
| rpmH-rnpA                                   | FNR    | Fis    | CRP    |
| rpoE-rseABC                                 | CpxR   | FNR    | CRP    |
| rpoH                                        | CytR   | DnaA   | IHF    |
| rpoZ-spoT-trmH-recG                         | rpoH   | H-NS   | CRP    |
| rppH-ptsP                                   | CpxR   | BaeR   | EvgA   |
| rpsB-tsf                                    | FNR    | Fis    | ArcA   |
| rpsF-priB-rpsR-rplI                         | FNR    | ArcA   | Fis    |
| rpsJ-rplCDWB-rpsS-rplV-rpsC-rplP-rpmC-rpsQ  | ArcA   | FNR    | Fis    |
| rpsLG-fusA-tufA                             | FNR    | Fis    | ArcA   |
| rpsMKD-rpoA-rplQ                            | FNR    | Fis    | ArcA   |
| rpsP-rimM-trmD-rplS                         | ArcA   | FNR    | Fis    |
| rpsT                                        | FNR    | Fis    | CRP    |
| rpsU-dnaG-rpoD                              | LexA   | Fis    | FNR    |
| rraB                                        | CRP    | CytR   | Fur    |
| rrmA                                        | FadR   | NhaR   | OmpR   |
| rrmJ-hflB                                   | rpoH   | CRP    | CpxR   |
| rsd                                         | ArcA   | CRP    | H-NS   |
| rseP                                        | Fis    | ArgR   | CpxR   |
| rsgA                                        | ArgR   | CpxR   | FliHDC |
| rsmB                                        | CpxR   | ArgR   | FNR    |
| rsmC                                        | CpxR   | CRP    | LexA   |
| rsmD-yhhL                                   | ArgR   | CpxR   | FliHDC |
| rsmE-gshB                                   | CpxR   | SoxS   | GntR   |
| rsmF                                        | PurR   | Fis    | GadE   |
| rspAB                                       | CpxR   | rpoH   | Cbl    |
| rssAB                                       | NtrC   | DicA   | FliA   |
| rstAB                                       | PhoP   | FNR    | IHF    |
| rsuA                                        | CpxR   | FNR    | IHF    |
| rtcBA                                       | MngR   | NagC   | NarP   |
| rtn                                         | FruR   | GadE   | H-NS   |
| rumA                                        | DcuR   | FliHDC | MalT   |
| rutABCDEFG                                  | PhoP   | ArcA   | NtrC   |
| rutR                                        | AllS   | DhaR   | MarA   |
| ruvAB                                       | LexA   | CRP    | CdaR   |

|                        |       |       |       |
|------------------------|-------|-------|-------|
| sanA-yeiS              | FlhDC | GntR  | IdnR  |
| sapABCDF               | LexA  | SoxS  | AllR  |
| sbcB                   | Fis   | Fur   | H-NS  |
| sbcDC                  | AgaR  | AllR  | AsnC  |
| sbmA-yaiW              | CytR  | FlhDC | IscR  |
| sbmC                   | ArcA  | CRP   | FNR   |
| sbp                    | IHF   | CRP   | CysB  |
| scpA-argK-scpBC        | AgaR  | CsgD  | EvgA  |
| sdaA                   | CRP   | Lrp   | IHF   |
| sdaCB                  | CRP   | ArcA  | IHF   |
| sdhCDAB--sucABCD       | Fur   | ArcA  | IHF   |
| sdiA                   | CRP   | FNR   | Fis   |
| secB-gpsA              | rpoH  | NagC  | CRP   |
| secE-nusG              | Fis   | ArgR  | CRP   |
| secG                   | Fis   | ArgR  | CRP   |
| secMA-mutT             | ModE  | NarL  | BaeR  |
| selAB                  | NarL  | NarP  | CpxR  |
| seqA-pgm               | HU    | PhoP  | GadE  |
| serA                   | CRP   | Lrp   | Nac   |
| serB-radA-nadR         | CpxR  | GadW  | PhoB  |
| serC-aroA              | CRP   | Lrp   | IHF   |
| serS                   | FNR   | ArcA  | CRP   |
| setB                   | CsgD  | GalR  | HU    |
| sfmA                   | AgaR  | CpxR  | CsgD  |
| sfmCD                  | ArgR  | AtoC  | CpxR  |
| sfmHF                  | AcrR  | Cbl   | CsgD  |
| sfsA                   | H-NS  | CRP   | FNR   |
| sgcXBCQAER             | GntR  | FadR  | CdaR  |
| sgrR-sroA-tbpA-thiPQ   | CpxR  | AllR  | ModE  |
| sgrST-setA             | CsgD  | Fur   | GlpR  |
| shiA                   | CRP   | FNR   | GadX  |
| sieB                   | CRP   | CpxR  | CytR  |
| sirA                   | FNR   | Fur   | GadE  |
| sixA                   | CpxR  | Fur   | H-NS  |
| slp-dctR               | H-NS  | MarA  | ArcA  |
| slt                    | CpxR  | DicA  | ExuR  |
| slyA                   | CpxR  | FruR  | Fur   |
| slyB                   | Fis   | PhoP  | FNR   |
| smg                    | CRP   | CpxR  | Fis   |
| smpA                   | ArcA  | CRP   | CpxR  |
| smpB                   | FNR   | Fis   | FruR  |
| smtA-mukFEB            | H-NS  | CpxR  | SoxS  |
| sodA                   | MarA  | Rob   | SoxS  |
| sodB                   | Fur   | H-NS  | IHF   |
| sodC                   | Fis   | CRP   | Lrp   |
| sohA-yhaV              | CRP   | CpxR  | Fis   |
| sohB                   | CysB  | LexA  | OxyR  |
| solA-yceO              | CpxR  | PhoB  | RcsAB |
| soxR                   | FNR   | Fis   | MetJ  |
| soxS                   | SoxS  | CRP   | IHF   |
| speAB                  | PurR  | CpxR  | FNR   |
| speC                   | BetI  | CRP   | GntR  |
| speF-potE              | CpxR  | CsgD  | AllR  |
| sppA                   | LexA  | MarA  | NagC  |
| spr                    | CRP   | IHF   | H-NS  |
| spy                    | BaeR  | CRP   | CpxR  |
| srlAEBD-gutM-srlR-gutQ | GutM  | GutR  | CRP   |
| srmB                   | Fis   | CRP   | FNR   |
| ssb                    | LexA  | CpxR  | NhaR  |

|                                 |       |       |       |
|---------------------------------|-------|-------|-------|
| sscR                            | CpxR  | DeoR  | Fis   |
| sseA                            | CRP   | FNR   | GlpR  |
| sseB                            | ArcA  | CdaR  | DnaA  |
| sspAB                           | LexA  | CpxR  | FNR   |
| sstT                            | IHF   | ArcA  | CRP   |
| ssuEADCB                        | Cbl   | NagC  | ArgR  |
| sthA                            | ArcA  | CRP   | FNR   |
| sufABCDESE                      | OxyR  | Fur   | IscR  |
| sugE                            | CpxR  | CsiR  | DeoR  |
| suhB                            | CRP   | FNR   | Fis   |
| sulA                            | ArcA  | CRP   | LexA  |
| surE-pcm                        | ArgR  | RcsAB | AcrR  |
| sxy                             | CsgD  | DicA  | FhlA  |
| syd                             | ArgR  | CpxR  | FlhDC |
| symE                            | CaiF  | CpxR  | LacI  |
| tag-yiaC                        | CpxR  | FhlA  | ModE  |
| talA                            | SoxS  | Fis   | H-NS  |
| talB                            | FNR   | ArcA  | CRP   |
| tam                             | NtrC  | CRP   | FNR   |
| tar-tap-cheRBYZ                 | CpxR  | FNR   | FlhDC |
| tas                             | ArgR  | CRP   | H-NS  |
| tatABCD                         | ArgR  | FNR   | Fis   |
| tatE                            | CRP   | CpxR  | HU    |
| tauABCD                         | CysB  | Cbl   | CpxR  |
| tdcABCDEFGF                     | IHF   | TdcA  | CpxR  |
| tdcR                            | AgaR  | CRP   | Fis   |
| tdk                             | CRP   | FNR   | Fis   |
| tehAB                           | AscG  | CRP   | FNR   |
| tesA-ybbO                       | AppY  | AraC  | ArgR  |
| tesB                            | PhoB  | Cbl   | CueR  |
| tfaD                            | FNR   | Fur   | CRP   |
| tgt-yajC-secDF                  | Fis   | CRP   | FNR   |
| thiCEFSGH                       | CRP   | IHF   | Lrp   |
| thil                            | Fis   | CpxR  | IHF   |
| thiMD                           | CpxR  | H-NS  | Lrp   |
| thrLABC                         | IHF   | CRP   | Lrp   |
| thrS-infC-rpml-rpIT-pheMST-ihfA | FNR   | CRP   | Fis   |
| thrU-tyrU-glyT-thrT-tufB        | ArcA  | FNR   | Fis   |
| tig                             | FNR   | Fis   | ArcA  |
| tilS                            | AgaR  | DicA  | HyfR  |
| tktA                            | ArcA  | CRP   | FNR   |
| tktB                            | SoxS  | H-NS  | IHF   |
| tldD                            | CpxR  | ExuR  | Fis   |
| tnaCAB                          | TorR  | CRP   | ArcA  |
| tolB-pal-ybgF                   | CpxR  | FNR   | Fis   |
| tolC-ygiABC                     | CpxR  | Fis   | rpoH  |
| tonB                            | Fur   | IHF   | CRP   |
| topA                            | Fis   | rpoH  | FlhDC |
| torCAD                          | NagC  | NarL  | NarP  |
| torR                            | DgsA  | NtrC  | PhoB  |
| torS                            | Rob   | Cbl   | CdaR  |
| torT                            | CsgD  | DicA  | ExuR  |
| torYZ                           | NagC  | Rob   | CaiF  |
| tpiA                            | CRP   | FNR   | Fis   |
| tppB                            | OmpR  | ArgR  | CRP   |
| tpx                             | FNR   | ArcA  | FruR  |
| tqsA                            | FlhDC | CpxR  | RcsAB |
| treA                            | NtrC  | FNR   | Fis   |
| treBC                           | ArcA  | CRP   | IHF   |

|                |       |       |       |
|----------------|-------|-------|-------|
| treF           | NtrC  | Ada   | FNR   |
| treR           | PhoP  | DeoR  | HcaR  |
| trg            | FNR   | CRP   | CpxR  |
| trkA           | ArgR  | CpxR  | Fis   |
| trkG           | ArgP  | CRP   | CpxR  |
| trmA           | Fis   | rpoH  | CRP   |
| trmI-yggL      | FNR   | Fis   | AllS  |
| trmJ           | ArgR  | CpxR  | Fis   |
| trpH-yciOQ     | PhoB  | FlhDC | LexA  |
| trpLEDCBA      | TrpR  | IHF   | Lrp   |
| trpR           | TrpR  | ChbR  | GalR  |
| truD           | CpxR  | CusR  | GadE  |
| trxA           | CRP   | CpxR  | Fis   |
| trxB           | Fis   | FNR   | H-NS  |
| trxC           | OxyR  | ArcA  | Fur   |
| tsgA           | CRP   | Fis   | FNR   |
| tsr            | CpxR  | FlhDC | FNR   |
| tsx            | CRP   | CytR  | ArcA  |
| ttcA           | CRP   | FNR   | HU    |
| ttdABT         | AgaR  | ChbR  | BaeR  |
| ttdR           | CysB  | FhlA  | FlhDC |
| tus            | CpxR  | Fis   | FlhDC |
| tusE           | BaeR  | LexA  | NhaR  |
| tynA           | RcsAB | CusR  | FlhDC |
| typA           | FNR   | Fis   | ArcA  |
| tyrB           | TyrR  | CpxR  | FruR  |
| tyrP           | HU    | TyrR  | Fur   |
| tyrTV-tpR      | CRP   | FNR   | Fis   |
| ubiCA          | NarL  | ArcA  | IHF   |
| ubiD           | CpxR  | FNR   | FruR  |
| ubiE-yigP-ubiB | ArgR  | CpxR  | Fis   |
| ubiF           | GadX  | LexA  | NarP  |
| ubiG           | AscG  | Cbl   | CpxR  |
| ucpA           | CRP   | FNR   | GntR  |
| udk-dcd        | FNR   | SoxS  | Fis   |
| udp            | CRP   | CytR  | FNR   |
| ugd            | CRP   | CpxR  | FlhDC |
| ugpBAECQ       | PhoB  | NtrC  | Fis   |
| uhpABC         | FhlA  | AgaR  | CRP   |
| uhpT           | CRP   | CaiF  | FNR   |
| uidABC         | UxuR  | CRP   | MarA  |
| uidR           | Nac   | NagC  | NarL  |
| ulaABCDEF      | IdnR  | UlaR  | AgaR  |
| ulaG           | AgaR  | FadR  | GntR  |
| umuDC          | LexA  | CRP   | ArcA  |
| ung            | CpxR  | H-NS  | LexA  |
| upp-uraA       | FNR   | IHF   | CRP   |
| ushA           | FadR  | CueR  | FNR   |
| uspA           | CRP   | FadR  | Fis   |
| uspC           | AraC  | ArgP  | AscG  |
| uspE           | ArcA  | CRP   | FNR   |
| uspF           | CRP   | DnaA  | FNR   |
| uspG           | rpoH  | CRP   | FNR   |
| uvrA           | ArcA  | LexA  | CRP   |
| uvrB           | ArcA  | LexA  | CRP   |
| uvrD           | LexA  | FlhDC | H-NS  |
| uvrYC          | LexA  | CpxR  | rpoH  |
| uxaB           | CRP   | ExuR  | FlhDC |
| uxaCA          | ExuR  | FNR   | AgaR  |

|                                          |       |       |       |
|------------------------------------------|-------|-------|-------|
| uxuAB                                    | UxuR  | ExuR  | CRP   |
| uxuR                                     | ExuR  | BirA  | FruR  |
| vacJ                                     | FruR  | CpxR  | GadX  |
| ves                                      | CpxR  | FlhDC | FNR   |
| waaA-coaD                                | AgaR  | ArgR  | ExuR  |
| wbbIJK                                   | CRP   | IHF   | ArcA  |
| wcaCDEF-gmd-fcl-gmm-wcal-cpsBG-wcaJ-wzxC | AgaR  | ArgR  | FliA  |
| wcaKLM                                   | AtoC  | NagC  | RcsAB |
| wrbA-yccJ                                | CRP   | IHF   | Fis   |
| wza-wzb-wzc-wcaAB                        | RcsAB | AIIR  | FlhDC |
| xapAB                                    | GntR  | RcsAB | ArgR  |
| xapR                                     | FlhDC | Fur   | GntR  |
| xdhABC                                   | GntR  | AgaR  | AIIR  |
| xerD-dsbC-recJ-prfB-lysS                 | CpxR  | rpoH  | FNR   |
| xni                                      | GntR  | DhaR  | IclR  |
| xseA                                     | CRP   | CpxR  | Fis   |
| xseB-ispA-dxs-yajO                       | H-NS  | Fis   | CRP   |
| xthA                                     | CpxR  | FNR   | IHF   |
| xylAB                                    | Fis   | XylR  | AgaR  |
| xylE                                     | BaeR  | CpxR  | FNR   |
| xylFGHR                                  | Fis   | CRP   | GntR  |
| yaaA                                     | AscG  | IscR  | NanR  |
| yaaH                                     | BaeR  | Fur   | MalT  |
| yaaJ                                     | CaiF  | CsgD  | FlhDC |
| yaaU                                     | FadR  | NagC  | NarP  |
| yaaW                                     | AIIR  | GalR  | GalS  |
| yabPQ                                    | BaeR  | CRP   | FNR   |
| yacC-speED                               | CRP   | Fis   | IHF   |
| yacH                                     | AgaR  | BaeR  | Cbl   |
| yacL                                     | CRP   | CpxR  | Fur   |
| yadE                                     | AgaR  | CdaR  | FlhDC |
| yadGH                                    | CpxR  | Lrp   | ModE  |
| yadI                                     | CytR  | CdaR  | FNR   |
| yadMLKC                                  | IHF   | rpoH  | CRP   |
| yadN                                     | AraC  | AscG  | CaiF  |
| yaeF                                     | AIIR  | LexA  | MarA  |
| yaeH                                     | CRP   | FNR   | IHF   |
| yaeI                                     | ChbR  | CytR  | DnaA  |
| yaeQJ-nlpE                               | CpxR  | Cbl   | PhoP  |
| yaeT-hlpA-lpxD-fabZ-lpxAB-rnhB-dnaE      | CpxR  | GadE  | Fis   |
| yafC                                     | ArgR  | CpxR  | DicA  |
| yafDE                                    | Fis   | CpxR  | CRP   |
| yafJ                                     | CpxR  | FNR   | H-NS  |
| yafK                                     | Fis   | IHF   | CRP   |
| yafM                                     | ArgR  | CpxR  | CynR  |
| yafNOP                                   | LexA  | CRP   | Cbl   |
| yafS                                     | ArgR  | DhaR  | GntR  |
| yafT                                     | AraC  | CsgD  | Fur   |
| yafV                                     | Cbl   | FadR  | MarA  |
| yafY-ykfBF-yafX-ykfGH-yafW-ykfl          | FlhDC | Cbl   | CRP   |
| yagAB-ykgN                               | AraC  | CaiF  | CsgD  |
| yagEF                                    | ArcA  | CRP   | Fis   |
| yagGH                                    | AIIR  | ArgR  | FucR  |
| yagI                                     | AraC  | ArgR  | AscG  |
| yagJ                                     | FlhDC | GntR  | HU    |
| yagML                                    | CpxR  | IHF   | NhaR  |
| yagN                                     | CRP   | ArcA  | IHF   |
| yagP                                     | CsgD  | LexA  | MetR  |
| yagTSRQ                                  | ArgR  | FlhDC | MprA  |

|                  |       |       |       |
|------------------|-------|-------|-------|
| yagU             | CRP   | IHF   | FNR   |
| yahA             | CRP   | Fis   | Fur   |
| yahB             | AcrR  | DgsA  | Fis   |
| yahC             | Cbl   | EnvY  | EvgA  |
| yahDEFG          | PhoB  | AgaR  | NtrC  |
| yahIJ            | FNR   | ModE  | NagC  |
| yahK             | GadE  | GadX  | H-NS  |
| yahL             | CpxR  | Fur   | GntR  |
| yahM             | CRP   | CueR  | Fis   |
| yahO             | CRP   | FNR   | Fis   |
| yaiE             | CRP   | DcuR  | Fis   |
| yaiF             | DicA  | Fur   | LexA  |
| yaiL             | CpxR  | GadE  | LexA  |
| yaiP             | AllR  | CusR  | DicA  |
| yaiT             | Fur   | NarL  | DicA  |
| yaiU             | CytR  | GntR  | LexA  |
| yaiY             | CpxR  | FihDC | LexA  |
| yaiZ             | CRP   | CpxR  | DeoR  |
| yajD             | CpxR  | Fur   | HcaR  |
| yajG             | CRP   | Fis   | CpxR  |
| yajQ             | CRP   | CpxR  | Fis   |
| yajR             | BetI  | MelR  | PspF  |
| ybaA             | CRP   | CdaR  | Fis   |
| ybaB-recR        | CpxR  | CytR  | DeoR  |
| ybaE             | ArgR  | DgsA  | FihDC |
| ybaJ-hha         | CpxR  | CRP   | FNR   |
| ybaK             | AscG  | CaiF  | Cbl   |
| ybaL             | HU    | Rob   | SoxS  |
| ybaO             | CpxR  | DicA  | HcaR  |
| ybaP             | SoxS  | Cbl   | CpxR  |
| ybaQ             | CpxR  | CRP   | Fur   |
| ybaST            | GadX  | H-NS  | MarA  |
| ybaW             | DicA  | GntR  | HU    |
| ybaY             | Fis   | IHF   | CRP   |
| ybbAP            | ArgR  | GalR  | GalS  |
| ybbB             | ExuR  | GntR  | MetJ  |
| ybbLM            | CRP   | CpxR  | GlpR  |
| ybbN             | rpoH  | CRP   | GadX  |
| ycbH             | ArgR  | IscR  | NtrC  |
| ycbI             | AraC  | CsgD  | DhaR  |
| ycbK             | AgaR  | CpxR  | FNR   |
| ycbLM            | PhoB  | CpxR  | ArgR  |
| ycbV             | Ada   | BetI  | CRP   |
| ybdG             | AraC  | IclR  | MprA  |
| ybdH             | Fur   | MetJ  | ModE  |
| ybdK             | CytR  | Fis   | NtrC  |
| ybdL             | rpoH  | ArgR  | CRP   |
| ybdM             | AllR  | BetI  | GalR  |
| ybdN             | CpxR  | NagC  | NanR  |
| ybdO             | CpxR  | CytR  | IHF   |
| ybdR             | RcsAB | CpxR  | FhIA  |
| ybeBA-mrdAB-rlpA | Fis   | CpxR  | FNR   |
| ybeD-lipB        | rpoH  | CRP   | CpxR  |
| ybeF             | CytR  | LexA  | MarA  |
| ybeHM            | ArgR  | Fur   | GntR  |
| ybeL             | H-NS  | CRP   | FNR   |
| ybeQ             | CpxR  | DgsA  | LexA  |
| ybeR-djlB        | CpxR  | CusR  | AgaR  |
| ybeU-djlC        | AgaR  | ArgR  | CaiF  |

|                     |        |      |        |
|---------------------|--------|------|--------|
| ybeZYX-Int          | CRP    | rpoH | Fis    |
| ybfA                | ArcA   | CRP  | DcuR   |
| ybfD                | AgaR   | ArgR | CRP    |
| ybfE                | ArcA   | CRP  | Fis    |
| ybfF                | IclR   | NtrC | PhoB   |
| ybfL                | CRP    | CpxR | CsgD   |
| ybfM                | RcsAB  | CpxR | Lrp    |
| ybfN                | LexA   | NagC | NtrC   |
| ybgA-phr            | Ada    | CynR | EvgA   |
| ybgC-tolQRA         | Fis    | ArgR | CpxR   |
| ybgD                | CRP    | CusR | FNR    |
| ybgE                | FNR    | FruR | ArcA   |
| ybgH                | ArgR   | Cbl  | ChbR   |
| ybgJKL-nei          | Lrp    | rpoH | IHF    |
| ybgQPO              | RcsAB  | CdaR | Fur    |
| ybgS                | NtrC   | ArcA | IHF    |
| ybhA                | H-NS   | CRP  | Fur    |
| ybhC                | CRP    | CpxR | FNR    |
| ybhD                | ArgR   | CRP  | Fur    |
| ybhH                | AgaR   | BetI | CRP    |
| ybhK                | LexA   | ArcA | H-NS   |
| ybhL                | CRP    | CdaR | FNR    |
| ybhM                | AgaR   | CpxR | CsgD   |
| ybhPON              | NtrC   | FhIA | MarA   |
| ybhQ                | CRP    | CdaR | CpxR   |
| ybiC                | CRP    | FNR  | IHF    |
| ybiH-ybhGFSR        | FNR    | rpoH | CRP    |
| ybil                | CRP    | Fur  | IHF    |
| ybiJ                | Cbl    | FNR  | IHF    |
| ybiM                | CpxR   | CsgD | DeoR   |
| ybiP                | Fur    | Fis  | FliHDC |
| ybiT                | rpoH   | FNR  | FadR   |
| ybiU                | ArcA   | CRP  | FNR    |
| ybiV                | CRP    | FNR  | HU     |
| ybiYW               | AgaR   | AtoC | CaiF   |
| ybjC-nfsA-rimK-ybjN | SoxS   | Fis  | AgaR   |
| ybjD                | FadR   | Fur  | H-NS   |
| ybjE                | AppY   | Cbl  | CpxR   |
| ybjG                | PhoP   | ArcA | IHF    |
| ybjH                | Cbl    | FadR | GutM   |
| ybjJl               | SoxS   | AgaR | AraC   |
| ybjK                | AgaR   | DgsA | ExuR   |
| ybjL                | CpxR   | CytR | FadR   |
| ybjM                | ArcA   | CRP  | FNR    |
| ybjO-rumB           | PurR   | ExuR | Fis    |
| ybjP                | IHF    | FNR  | Fis    |
| ybjQ-amiD           | AppY   | rpoH | Cbl    |
| ybjS                | FliHDC | FruR | H-NS   |
| ybjX                | CRP    | FNR  | H-NS   |
| ycaC                | BaeR   | H-NS | FNR    |
| ycaD                | DicA   | GntR | ModE   |
| ycaI-msbA-lpxK-ycaQ | ArcA   | AscG | CRP    |
| ycaM                | ArgR   | CpxR | FhIA   |
| ycaN                | ArgR   | CdaR | CpxR   |
| ycaO                | Fis    | CRP  | IHF    |
| ycaP                | Ada    | Fis  | MarA   |
| ycaR-kdsB           | AllR   | ArcA | CpxR   |
| ycbB                | CpxR   | FNR  | Fis    |
| ycbC                | DeoR   | DicA | GlpR   |



|                                 |      |       |       |
|---------------------------------|------|-------|-------|
| ycbG                            | Fis  | FruR  | IclR  |
| ycbJ                            | CRP  | FNR   | FhlA  |
| ycbKL                           | CRP  | H-NS  | IHF   |
| ycbRSTUVF                       | NagC | RcsAB | UxuR  |
| ycbW                            | CpxR | Fur   | GlpR  |
| ycbX                            | CpxR | Fur   | H-NS  |
| ycbZ                            | ArgR | Fis   | FlhDC |
| yccA                            | CRP  | CpxR  | FNR   |
| yccE                            | ArgR | CpxR  | GalR  |
| yccFS                           | CpxR | DeoR  | DgsA  |
| yccM                            | Fis  | FlhDC | Fur   |
| yccT                            | AscG | NagC  | NanR  |
| yccU                            | NtrC | AllS  | CpxR  |
| yccW                            | ArcA | FNR   | Fis   |
| yccX                            | BaeR | FlhDC | MtlR  |
| ycdT                            | CpxR | H-NS  | LexA  |
| ycdXY                           | MprA | PhoP  | Cbl   |
| ycdZ                            | AraC | ArcA  | CRP   |
| yceA                            | CRP  | ArcA  | FNR   |
| yceB                            | AllR | CaiF  | FadR  |
| yceD-rpmF-plsX-fabHDG-acpP-fabF | Fis  | FNR   | CRP   |
| yceF                            | AppY | BaeR  | Cbl   |
| yceH                            | ArgP | CaiF  | CpxR  |
| yceJl                           | ArcA | CRP   | FNR   |
| yceK                            | ArgR | FNR   | IHF   |
| yceM                            | CpxR | DeoR  | GntR  |
| yceN                            | CpxR | FNR   | FadR  |
| yceQ                            | CpxR | FlhDC | ArgR  |
| ycfD                            | ExuR | Fis   | MtlR  |
| ycfJ                            | FNR  | Fis   | IHF   |
| ycfQ                            | CpxR | CytR  | FNR   |
| ycfS                            | CpxR | BaeR  | CRP   |
| ycgB                            | NtrC | CRP   | FNR   |
| ycgE                            | CRP  | CpxR  | FNR   |
| ycgF                            | CRP  | CpxR  | FNR   |
| ycgG                            | CpxR | Fis   | FNR   |
| ycgK                            | CRP  | Fis   | Fur   |
| ycgL                            | ArgP | CRP   | DnaA  |
| ycgM                            | CpxR | CsgD  | Fur   |
| ycgN                            | PhoP | CpxR  | Lrp   |
| ycgR                            | CpxR | FlhDC | FNR   |
| ycgV                            | ArgR | CytR  | FlhDC |
| ycgX                            | AraC | CRP   | Cbl   |
| ycgZ                            | IHF  | CRP   | CpxR  |
| yche_2-yhcF                     | DnaA | FadR  | FlhDC |
| ychH                            | CRP  | CpxR  | FNR   |
| ychJ                            | CpxR | FNR   | Fis   |
| ychM                            | CRP  | FNR   | FruR  |
| ychN                            | AllS | CRP   | DgsA  |
| ychO                            | GntR | NagC  | NarP  |
| ychQA-kdsA                      | CRP  | FNR   | Fis   |
| ychS                            | Fis  | FNR   | FhlA  |
| yciA                            | CRP  | Fis   | FlhDC |
| yciCB                           | ArcA | CRP   | AraC  |
| yciGFE                          | H-NS | FNR   | CRP   |
| ycil                            | CRP  | IHF   | Lrp   |
| yciK-btuR                       | AscG | FlhDC | AraC  |
| yciN                            | CpxR | FNR   | GntR  |
| yciSM-pyrF-yciH                 | Fis  | Nac   | CRP   |

|                       |        |        |        |
|-----------------------|--------|--------|--------|
| yciW                  | CRP    | IHF    | CysB   |
| yciZ-deoT             | CpxR   | H-NS   | Lrp    |
| ycjG                  | DgsA   | FadR   | Nac    |
| ycjMNOQRSTUVWXYZ-ymjB | rpoH   | GntR   | NagC   |
| ycjW                  | LexA   | NarP   | PurR   |
| ycjXF-tyrR            | rpoH   | SoxS   | TyrR   |
| ycjY                  | CpxR   | FliHDC | LexA   |
| ycjZ                  | CdaR   | CpxR   | MalT   |
| ydaGF                 | CpxR   | CytR   | Fis    |
| ydaL                  | CRP    | Fis    | Lrp    |
| ydaM                  | CRP    | FNR    | GntR   |
| ydaN                  | ArcA   | CRP    | CpxR   |
| ydaSTUVW-rzpR         | GntR   | ArgR   | NagC   |
| ydbA_1                | CpxR   | CusR   | DgsA   |
| ydbA_2                | CRP    | CpxR   | CsgD   |
| ydbC                  | ArgR   | CpxR   | NagC   |
| ydbD                  | Cbl    | CdaR   | CpxR   |
| ydbH-yneE-ydbL        | NarL   | PaaX   | PhoB   |
| ydbK                  | CRP    | CpxR   | IHF    |
| ydcF                  | CpxR   | FliHDC | NtrC   |
| ydcI                  | CRP    | ArcA   | FNR    |
| ydcK                  | NtrC   | CRP    | FNR    |
| ydcL                  | NtrC   | CRP    | EnvY   |
| ydcN                  | AsnC   | HcaR   | MarA   |
| ydcO                  | LexA   | NtrC   | PhoB   |
| ydcP                  | CRP    | CpxR   | Fis    |
| ydcR                  | ArgR   | ExuR   | NagC   |
| ydcSTUV               | NtrC   | ArgR   | Lrp    |
| ydcW                  | ArgR   | DeoR   | DicA   |
| ydcY                  | Rob    | ModE   | PhoB   |
| yddAB                 | CRP    | CpxR   | Fur    |
| yddE                  | DicA   | IclR   | LexA   |
| yddG                  | CpxR   | GadE   | NarP   |
| yddH                  | FliHDC | FruR   | NagC   |
| yddLKJ                | CpxR   | FNR    | FliHDC |
| yddM                  | AraC   | CRP    | CpxR   |
| yddV-dos              | NtrC   | AtoC   | CaiF   |
| yddW                  | RcsAB  | ArgR   | FruR   |
| ydeA                  | ArcA   | FNR    | CRP    |
| ydeE                  | HU     | MalT   | NagC   |
| ydeH                  | CpxR   | CRP    | FNR    |
| ydeM                  | Fis    | CRP    | CpxR   |
| ydeN                  | CRP    | FNR    | Fis    |
| ydeP                  | CRP    | CpxR   | H-NS   |
| ydeQ                  | CpxR   | FliHDC | PhoB   |
| ydeTSR                | CpxR   | Fur    | IHF    |
| ydfAB-rzpQ            | Fis    | FliHDC | AllS   |
| ydfG                  | ArcA   | CRP    | CytR   |
| ydfH                  | CpxR   | DicA   | EnvY   |
| ydfI                  | FNR    | FliHDC | Fur    |
| ydfJ                  | ArgR   | CpxR   | FliHDC |
| ydfUT                 | CpxR   | FliHDC | GntR   |
| ydfV                  | AgaR   | ArgR   | CpxR   |
| ydfZ                  | ArcA   | CRP    | FNR    |
| ydgA                  | Fis    | FNR    | IHF    |
| ydgD                  | PhoB   | ArgR   | CpxR   |
| ydgH                  | CpxR   | FNR    | H-NS   |
| ydgl-folM             | rpoH   | FruR   | NarL   |
| ydgJ                  | GadX   | LeuO   | LexA   |

|                    |       |       |       |
|--------------------|-------|-------|-------|
| ydgK-rsxABCDEG-nth | Fis   | FNR   | CpxR  |
| ydhB               | MelR  | MhpR  | RcsAB |
| ydhC               | DcuR  | HU    | IclR  |
| ydhF               | ArcA  | CRP   | CsiR  |
| ydhIJK             | rpoH  | Fis   | PhoP  |
| ydhL               | FlhDC | ArgR  | NtrC  |
| ydhM               | CRP   | ExuR  | Fis   |
| ydhO               | SoxS  | Fur   | H-NS  |
| ydhP               | FruR  | GntR  | NtrC  |
| ydhQ               | CRP   | FNR   | IHF   |
| ydhR               | Fis   | ArcA  | CRP   |
| ydhS               | NtrC  | CpxR  | H-NS  |
| ydhXUT             | NagC  | GntR  | FhlA  |
| ydhYVW             | NarL  | FNR   | IHF   |
| ydhZ               | BaeR  | CpxR  | FadR  |
| ydiA               | CRP   | FNR   | Fis   |
| ydiE               | CRP   | CytR  | FhlA  |
| ydiFO              | RcsAB | ArgR  | CpxR  |
| ydiJH              | CRP   | FNR   | H-NS  |
| ydiK               | CsgD  | HU    | LexA  |
| ydiL               | CpxR  | FlhDC | LexA  |
| ydiM               | CpxR  | FlhDC | GntR  |
| ydiNB-aroD         | CpxR  | RcsAB | rpoH  |
| ydiP               | CpxR  | FNR   | FlhDC |
| ydiQRST-fadK       | NagC  | GntR  | UxuR  |
| ydiU               | IscR  | CRP   | Fur   |
| ydiV               | CpxR  | PhoB  | DicA  |
| ydiY               | CRP   | FNR   | IHF   |
| ydiZ               | CRP   | ArcA  | Fis   |
| ydjA-selD-topB     | rpoH  | ArcA  | FNR   |
| ydjE               | CpxR  | CysB  | FlhDC |
| ydjF               | CpxR  | Fis   | FlhDC |
| ydjLKJIHG          | CpxR  | FlhDC | NagC  |
| ydjM               | CpxR  | LexA  | FlhDC |
| ydjN               | IHF   | CRP   | CysB  |
| ydjO               | AraC  | CpxR  | CsgD  |
| ydjXYZ-ynjABCD     | NarL  | IHF   | FNR   |
| yeaC               | CRP   | FNR   | ArcA  |
| yeaE               | FlhDC | GntR  | LeuO  |
| yeaGH              | Fis   | NtrC  | CRP   |
| yeaI               | CpxR  | H-NS  | IHF   |
| yeaL               | NagC  | ChbR  | PhoB  |
| yeaM               | FlhDC | ArgR  | CpxR  |
| yeaN               | RcsAB | CytR  | FadR  |
| yeaO               | Ada   | CpxR  | FlhDC |
| yeaP               | CRP   | CysB  | FNR   |
| yeaQ               | FNR   | Fis   | IHF   |
| yeaR-yoaG          | FNR   | IHF   | NarP  |
| yeaT               | CRP   | CpxR  | CytR  |
| yeaU               | ArcA  | CRP   | IHF   |
| yeaVW              | NagC  | GntR  | CusR  |
| yeaX               | FadR  | GntR  | LexA  |
| yeaZY              | Fis   | ArcA  | BaeR  |
| yebA               | CpxR  | Fis   | FlhDC |
| yebB               | CsgD  | LexA  | MetR  |
| yebE               | CpxR  | ArcA  | CRP   |
| yebF               | LexA  | ArcA  | CRP   |
| yebG               | LexA  | ArcA  | CRP   |
| yebK               | CRP   | FNR   | IHF   |

|            |       |       |       |
|------------|-------|-------|-------|
| yebN       | rpoH  | CsgD  | FruR  |
| yebO       | FNR   | CRP   | Fis   |
| yebQ       | CpxR  | FlhDC | H-NS  |
| yebR       | CRP   | CpxR  | Fis   |
| yebST      | RcsAB | AgaR  | AscG  |
| yebV       | H-NS  | IHF   | CRP   |
| yebW       | CpxR  | FNR   | Fur   |
| yecA       | PhoB  | ArcA  | CRP   |
| yecDE      | ArgR  | CRP   | CpxR  |
| yecF       | AraC  | CaiF  | CpxR  |
| yecH       | ArcA  | FNR   | GcvA  |
| yecM       | CaiF  | CpxR  | ModE  |
| yecN-cmoAB | PhoB  | PhoP  | CRP   |
| yecR       | AraC  | FNR   | FlhDC |
| yecT       | CdaR  | CpxR  | FlhDC |
| yedA       | DgsA  | IclR  | ModE  |
| yedD       | AllR  | FNR   | IHF   |
| yedEF      | FNR   | IHF   | CRP   |
| yedI       | NtrC  | FruR  | PhoB  |
| yedK       | ArgR  | DicA  | HU    |
| yedL       | CRP   | FNR   | GadX  |
| yedM       | Cbl   | FNR   | FlhDC |
| yedP       | Lrp   | MarA  | NtrC  |
| yedQ       | CpxR  | ArgR  | NtrC  |
| yedRJ      | PhoB  | AllS  | CRP   |
| yedWV      | CRP   | CpxR  | FNR   |
| yedX       | ArcA  | CRP   | FNR   |
| yedYZ      | CRP   | FNR   | FlhDC |
| yeeA       | LexA  | CRP   | H-NS  |
| yeeED      | CRP   | IHF   | CysB  |
| yeeF       | CRP   | ArcA  | FNR   |
| yeeN       | CRP   | ArcA  | CpxR  |
| yeeO       | CytR  | EnvY  | NagC  |
| yeeP       | ArgR  | CaiF  | IdnR  |
| yeeRSTUVW  | ExuR  | NarL  | OxyR  |
| yeeX       | Fis   | ArcA  | CRP   |
| yeeY       | CpxR  | FruR  | Fur   |
| yeeZ       | CpxR  | Fis   | Fur   |
| yefM-yoeB  | CRP   | CpxR  | FNR   |
| yegD       | FadR  | FNR   | Fis   |
| yegH       | GatR  | HcaR  | IclR  |
| yegLK      | NagC  | Rob   | AtoC  |
| yegP       | H-NS  | CRP   | FNR   |
| yegQ       | Fis   | CRP   | FNR   |
| yegS       | CRP   | DgsA  | Lrp   |
| yegTUV     | RcsAB | Rob   | UxuR  |
| yehDCBA    | AgaR  | ArgP  | ArgR  |
| yehE       | CRP   | DgsA  | Fis   |
| yehLMPQ    | AtoC  | FadR  | GntR  |
| yehR       | AraC  | AscG  | CdaR  |
| yehS       | CpxR  | DhaR  | FhIA  |
| yehUT      | CRP   | IHF   | Fis   |
| yeiCN      | GntR  | AgaR  | CRP   |
| yeiE       | BaeR  | BirA  | CpxR  |
| yeiG       | FruR  | Fis   | FlhDC |
| yeiH       | Cbl   | LrhA  | MhpR  |
| yeil       | AllR  | CpxR  | DeoR  |
| yeliL      | CsgD  | AraC  | MprA  |
| yeliM      | AgaR  | AscG  | HU    |

|               |       |       |       |
|---------------|-------|-------|-------|
| yeiP          | FNR   | Fis   | Fur   |
| yeiQ          | CRP   | ExuR  | H-NS  |
| yeiR-lpxT     | AsnC  | CRP   | CpxR  |
| yeiTA         | CRP   | FNR   | IHF   |
| yejABEF       | Fur   | CpxR  | IHF   |
| yejG          | ArcA  | CRP   | FNR   |
| yejH          | AllR  | HyfR  | LexA  |
| yejK          | AsnC  | CRP   | Fis   |
| yejLM         | ArcA  | ArgR  | CRP   |
| yejO          | HyfR  | NagC  | PdhR  |
| yfaATS_1S_2QP | AtoC  | NagC  | RcsAB |
| yfaD-ypaA     | RcsAB | CsgD  | FihDC |
| yfaE          | DnaA  | AraC  | ArgP  |
| yfaH          | CRP   | Fis   | GutM  |
| yfaL          | CaiF  | CsgD  | CytR  |
| yfaVU         | AllR  | RcsAB | UxuR  |
| yfaXW         | RcsAB | FihDC | GalR  |
| yfaY          | AsnC  | HU    | PhoB  |
| yfaZ          | CsgD  | FadR  | FhIA  |
| yfbK          | ArgR  | CaiF  | CsgD  |
| yfbL          | AgaR  | CsgD  | FucR  |
| yfbM          | AllR  | ArgR  | CpxR  |
| yfbN          | AgaR  | ArgR  | HU    |
| yfbO          | ArgR  | CRP   | CpxR  |
| yfbP          | AgaR  | CpxR  | LexA  |
| yfbQ          | CRP   | CpxR  | FNR   |
| yfbUT         | CRP   | CpxR  | CsgD  |
| yfbV          | rpoH  | CpxR  | FNR   |
| yfcC          | AgaR  | ExuR  | FucR  |
| yfcD          | IHF   | CpxR  | FNR   |
| yfcE          | Fis   | CRP   | FNR   |
| yfcF          | ArgR  | BaeR  | ModE  |
| yfcG          | HyfR  | LrhA  | NanR  |
| yfcI          | DicA  | FhIA  | HyfR  |
| yfcUTSRQPO    | NagC  | RcsAB | Cbl   |
| yfcZ          | CRP   | CadC  | EvgA  |
| yfdC          | NtrC  | CaiF  | FihDC |
| yfdE          | CpxR  | ModE  | NagC  |
| yfdF          | CpxR  | GadE  | GalR  |
| yfdGHI        | CRP   | IHF   | Fur   |
| yfdONMLK      | RcsAB | ArgR  | Cbl   |
| yfdPQ         | AgaR  | ArgR  | CusR  |
| yfdRST        | ArgR  | rpoH  | AgaR  |
| yfdV          | ArgR  | CpxR  | Fur   |
| yfdX          | AraC  | ArgP  | CpxR  |
| yfdY          | CRP   | CaiF  | Cbl   |
| yfdZ          | PhoB  | FruR  | PurR  |
| yfeA          | DicA  | FhIA  | GadX  |
| yfeCD         | CRP   | FNR   | NanR  |
| yfeKS         | CpxR  | AtoC  | CueR  |
| yfeO          | CpxR  | H-NS  | MarA  |
| yfeR          | CaiF  | ChbR  | FhIA  |
| yfeT          | AgaR  | CadC  | DgsA  |
| yfeYX         | CpxR  | FihDC | NarL  |
| yfb-dapE-ypfN | PhoB  | rpoH  | ArgP  |
| yffL          | ArcA  | CRP   | HU    |
| yffMN         | Fur   | IscR  | NarL  |
| yffOP         | RcsAB | AllR  | ExuR  |
| yffS          | ArcA  | CRP   | IHF   |

|                      |       |      |       |
|----------------------|-------|------|-------|
| yfgA                 | rpoH  | ArgR | CpxR  |
| yfgCD                | CpxR  | CysB | AgaR  |
| yfgF                 | AllR  | Cbl  | Fis   |
| yfgG                 | CRP   | CpxR | Fis   |
| yfgHI                | CsgD  | AgaR | AscG  |
| yfgL-der             | Fis   | ArgR | FruR  |
| yfgO                 | CsiR  | DeoR | RcsAB |
| yfhA                 | YiaJ  | CaiF | FhIA  |
| yfhB-tadA            | CpxR  | DicA | FadR  |
| yfhD                 | Rob   | BaeR | Fis   |
| yfhG                 | CpxR  | CusR | HyfR  |
| yfhH                 | FhIA  | GalR | GalS  |
| yfhK                 | CusR  | FadR | MtlR  |
| yfhL                 | CRP   | Cbl  | ChbR  |
| yfhM-pbpC            | CaiF  | Cbl  | CynR  |
| yfhR                 | AgaR  | CaiF | NagC  |
| yfiC                 | AlsR  | AraC | Cbl   |
| yfiD                 | ArcA  | FNR  | PdhR  |
| yfiF                 | AgaR  | GadX | MarA  |
| yfiL                 | CaiF  | Cbl  | NtrC  |
| yfiM                 | CpxR  | CsgD | Fis   |
| yfiO                 | CpxR  | Fis  | FlhDC |
| yfiPQ                | BaeR  | CRP  | DicA  |
| yfiRNB               | CpxR  | FNR  | rpoH  |
| yfjGF                | CpxR  | Fis  | LexA  |
| yfjLK                | FlhDC | NarL | OmpR  |
| yfjPQ                | AllR  | AlsR | ArgR  |
| yfjR-ypjK-yfjST      | FlhDC | AtoC | Cbl   |
| yfjXY-ypjJ-yfjZ-ypjF | Cbl   | AllR | AllS  |
| ygaC                 | Fur   | CpxR | IHF   |
| ygaM                 | IHF   | CRP  | Fis   |
| ygaU                 | CRP   | Fis  | H-NS  |
| ygaVP                | CysB  | Ada  | BaeR  |
| ygaW                 | IHF   | CRP  | CpxR  |
| ygaXY                | BaeR  | CaiF | Fis   |
| ygaZH                | FNR   | Fis  | CRP   |
| ygbI                 | CaiF  | CueR | GutM  |
| ygbJK                | FlhDC | AllS | ChbR  |
| ygbLM                | GntR  | AgaR | Cbl   |
| ygcB                 | ArgR  | GntR | HU    |
| ygcF                 | CpxR  | FNR  | Lrp   |
| ygcLKJIH-ygbTF       | FhIA  | NtrC | ArgR  |
| ygcNOP               | CRP   | GadE | MarA  |
| ygcRQ                | PhoB  | AllR | AtoC  |
| ygcS                 | PhoB  | EvgA | FhIA  |
| ygdE                 | BaeR  | GcvA | Nac   |
| ygdH                 | CRP   | FNR  | Lrp   |
| ygdI                 | IHF   | ArcA | CRP   |
| ygdL                 | CaiF  | CueR | FucR  |
| ygeA                 | AraC  | CRP  | CaiF  |
| ygeF                 | AgaR  | AppY | Fis   |
| ygeH                 | AllS  | Fis  | GntR  |
| ygeLK                | CusR  | Fis  | H-NS  |
| ygeP                 | CRP   | CdaR | CytR  |
| ygeQ                 | ArgR  | CRP  | FNR   |
| ygeR                 | CpxR  | DicA | GlpR  |
| ygeV                 | CRP   | DgsA | FNR   |
| ygeW                 | AtoC  | Cbl  | CpxR  |
| ygeY                 | AgaR  | AllR | CsgD  |

|                     |      |       |       |
|---------------------|------|-------|-------|
| ygfA-rygC           | CpxR | FadR  | H-NS  |
| ygfB-pepP-ubiH-visC | CpxR | LexA  | rpoH  |
| ygfF                | Cbl  | DgsA  | FhlA  |
| ygfI                | FhlA | GadX  | GntR  |
| ygfJ                | CRP  | FNR   | H-NS  |
| ygfK-ssnA           | AgaR | NagC  | AcrR  |
| ygfM-xdhD           | AgaR | AcrR  | AllS  |
| ygfO-guaD-ygfQ      | GntR | AcrR  | AllR  |
| ygfU                | GntR | AllR  | GalR  |
| ygfYX               | SoxS | CpxR  | FadR  |
| ygfZ                | CpxR | FlhDC | H-NS  |
| yggE                | CRP  | FNR   | IHF   |
| yggG                | Lrp  | MalT  | MetR  |
| yggI                | CaiF | DicA  | GadX  |
| yggM                | CusR | FlhDC | GntR  |
| yggN                | CpxR | FlhDC | FruR  |
| yggR                | CsgD | GalR  | GalS  |
| yggSTU-rdgB-yggW    | rpoH | FlhDC | CpxR  |
| yghA                | H-NS | IHF   | Lrp   |
| yghB                | CpxR | GalR  | GalS  |
| yghED               | AllR | AscG  | AsnC  |
| yghF                | rpoH | AllR  | FadR  |
| yghG                | BirA | CRP   | DicA  |
| yghO                | AcrR | AgaR  | DnaA  |
| yghQ                | AgaR | CysB  | ModE  |
| yghSR               | AtoC | GntR  | MngR  |
| yghT                | AcrR | AgaR  | CsgD  |
| yghU                | ArcA | H-NS  | LexA  |
| yghW                | CpxR | FlhDC | IHF   |
| yghZ                | CRP  | FNR   | H-NS  |
| ygiD                | DeoR | CytR  | DgsA  |
| ygiF-glnE           | ArgR | AraC  | Cbl   |
| ygiL                | ArgP | CpxR  | FlhDC |
| ygiN                | HU   | HcaR  | PhoP  |
| ygiS                | FNR  | Fis   | GadE  |
| ygiV                | CpxR | CysB  | MarA  |
| ygiW                | CRP  | IHF   | FNR   |
| ygiZ                | CpxR | Fis   | H-NS  |
| ygiG                | Fis  | IHF   | NtrC  |
| ygiH                | AgaR | GutM  | GutR  |
| ygiI                | FhlA | FlhDC | HyfR  |
| ygiNM               | BetI | CRP   | Fis   |
| ygiP                | CpxR | DicA  | IclR  |
| ygiR                | CRP  | CpxR  | CysB  |
| ygiV                | CdaR | CpxR  | CsgD  |
| yhaBC               | Fis  | H-NS  | IHF   |
| yhaH                | BaeR | Cbl   | EnvY  |
| yhaI                | AgaR | HyfR  | NarL  |
| yhaJ                | CaiF | EnvY  | FlhDC |
| yhaKL               | CpxR | CynR  | KdpE  |
| yhaOM               | CRP  | CdaR  | Fis   |
| yhbE-obgE           | Fis  | ArcA  | CRP   |
| yhbO                | MarA | SoxS  | Lrp   |
| yhbQ                | HcaR | IdnR  | NarP  |
| yhbTS               | NarL | AraC  | CaiF  |
| yhbUV               | FhlA | ModE  | NarL  |
| yhbW                | IHF  | FlhDC | MarA  |
| yhbY                | CRP  | FNR   | Fis   |
| yhcAD-ychE_1        | AtoC | Cbl   | FlhDC |

|                         |      |      |      |
|-------------------------|------|------|------|
| yhcB                    | AgaR | CpxR | Fur  |
| yhcC                    | AgaR | CpxR | CsgD |
| yhcG                    | AllR | ArgR | CpxR |
| yhcM                    | Ada  | CaiF | ChbR |
| yhcN                    | CRP  | IHF  | ArcA |
| yhcO                    | ArcA | CRP  | Cbl  |
| yhdH                    | CRP  | CytR | EnvY |
| yhdJ                    | AgaR | AllS | FhIA |
| yhdN-zntR               | CRP  | IHF  | rpoH |
| yhdT-panF-prmA          | OxyR | Ada  | AsnC |
| yhdV                    | EnvY | GntR | NagC |
| yhdWXYZ                 | NtrC | SdiA | AgaR |
| yheO-tusDCB             | CpxR | rpoH | CRP  |
| yheSTU                  | ArgP | CpxR | DnaA |
| yhfG-fic-pabA           | Fis  | NtrC | CRP  |
| yhfK                    | AllR | CytR | FhDC |
| yhfXW-php-yhfUTS        | GntR | NagC | AgaR |
| yhfZY                   | GntR | CsgD | FhIA |
| yhgE                    | DnaA | FhDC | FruR |
| yhgF                    | CpxR | FNR  | Fis  |
| yhgN                    | AraC | CaiF | CsgD |
| yhhA                    | CRP  | FNR  | Fis  |
| yhhH                    | AraC | AscG | CpxR |
| yhhK                    | AraC | Cbl  | CsgD |
| yhhN                    | AraC | CynR | IdnR |
| yhhQ                    | CpxR | LrhA | MarA |
| yhhS                    | BaeR | CpxR | FruR |
| yhhW                    | Cbl  | CpxR | CysB |
| yhhX                    | CpxR | FNR  | IHF  |
| yhhY                    | Fur  | GntR | MarR |
| yhhZ-yrhA-insA-6AB-6B-6 | ChbR | CsgD | DicA |
| yhil-rbbA-yhhJ          | MngR | PhoP | AgaR |
| yhiJ                    | Fis  | FhDC | GadE |
| yhiL                    | CRP  | CpxR | FNR  |
| yhiM                    | ArcA | CRP  | FNR  |
| yhiN                    | CpxR | FhDC | FruR |
| yhiP                    | CRP  | CpxR | LexA |
| yhiR                    | ArgR | GntR | LeuO |
| yhiS                    | CueR | CytR | DeoR |
| yhjA                    | AgaR | Cbl  | Fis  |
| yhjD                    | DeoR | Fis  | GadE |
| yhjE                    | CRP  | Lrp  | H-NS |
| yhjG                    | AgaR | ArcA | CRP  |
| yhjH                    | CpxR | FhDC | H-NS |
| yhjJ                    | CpxR | GntR | IscR |
| yhjK                    | CpxR | FNR  | FruR |
| yhjQ                    | CRP  | ExuR | Fis  |
| yhjV                    | BaeR | FNR  | Fis  |
| yhjX                    | CRP  | FNR  | FhIA |
| yhjY                    | PhoB | EvgA | GadX |
| yiaD                    | CRP  | ArcA | Fis  |
| yiaF                    | CpxR | FruR | GntR |
| yiaG                    | IHF  | CRP  | Fis  |
| yiaKLMNO-lyxK-sgbHUE    | YiaJ | AgaR | CaiF |
| yiaU                    | ArgR | CytR | DeoR |
| yiaWV                   | FhIA | Fis  | FhDC |
| yibF                    | CaiF | DgsA | ExuR |
| yibJ                    | FNR  | FadR | H-NS |
| yibK                    | FadR | FhDC | GadX |



|                          |       |       |       |
|--------------------------|-------|-------|-------|
| yibN                     | CpxR  | CusR  | FNR   |
| yicC                     | CpxR  | FhIA  | Fur   |
| yicG                     | CRP   | FNR   | IHF   |
| yicH                     | CpxR  | Fis   | IHF   |
| yicJl                    | AgaR  | FhIA  | GntR  |
| yicL                     | PhoB  | AgaR  | Fur   |
| yicR-rpmBG-mutM          | FNR   | Fis   | AgaR  |
| yidE                     | CpxR  | FlhDC | FruR  |
| yidHGF                   | AraC  | FhIA  | HyfR  |
| yidKJ                    | AllR  | FlhDC | GntR  |
| yidP                     | AllR  | FlhDC | NagC  |
| yidQ                     | CRP   | CpxR  | FNR   |
| yidR                     | CpxR  | IHF   | NarL  |
| yieEF                    | CpxR  | rpoH  | ArcA  |
| yieG                     | ArgR  | CRP   | FNR   |
| yieP-hsrA                | rpoH  | RcsAB | CRP   |
| yifB                     | CaiF  | Fis   | FlhDC |
| yifE                     | CRP   | CpxR  | IHF   |
| yifK                     | Ada   | ArcA  | FNR   |
| yifL-dapF-yigA-xerC-yigB | CpxR  | rpoH  | AllR  |
| yifNO                    | CRP   | CpxR  | CsiR  |
| yigGF                    | H-NS  | ArgR  | Cbl   |
| yigl                     | ArcA  | CRP   | FNR   |
| yigM                     | AgaR  | Betl  | DicA  |
| yihA                     | CpxR  | FlhDC | NagC  |
| yihF                     | Fis   | FlhDC | GntR  |
| yihG                     | CysB  | Fis   | GlpR  |
| yihI                     | PurR  | CpxR  | Fur   |
| yihLM                    | FhIA  | FlhDC | FruR  |
| yihN                     | AtoC  | CaiF  | GntR  |
| yihPO                    | BaeR  | FhIA  | Fis   |
| yihQ                     | CaiF  | CsgD  | MprA  |
| yihUTS                   | AcrR  | AllS  | AscG  |
| yihVW                    | CpxR  | GadX  | GntR  |
| yihXY-dtd-yiiD           | AgaR  | BaeR  | Cbl   |
| yiiF                     | CaiF  | Cbl   | CpxR  |
| yiiQ                     | SoxS  | ArgR  | CpxR  |
| yiiX                     | CpxR  | LexA  | MetJ  |
| yijE                     | AllR  | AscG  | CaiF  |
| yijF                     | AgaR  | AllR  | Cbl   |
| yijP                     | CRP   | FNR   | Fur   |
| yjaG                     | ArgR  | CpxR  | CsgD  |
| yjaH                     | AcrR  | ArgR  | CpxR  |
| yjaZ                     | rpoH  | LexA  | NtrC  |
| yjbB                     | AgaR  | AraC  | AscG  |
| yjbl                     | AgaR  | Fis   | GntR  |
| yjbJ                     | IHF   | ArcA  | CRP   |
| yjbQR                    | CRP   | FNR   | H-NS  |
| yjcB                     | CRP   | ArcA  | FNR   |
| yjcC                     | CpxR  | Fur   | LexA  |
| yjcD                     | FNR   | Fur   | Lrp   |
| yjcE                     | AtoC  | CaiF  | DnaA  |
| yjcF                     | Fis   | H-NS  | IHF   |
| yjcO                     | AppY  | CaiF  | CpxR  |
| yjdA-yjcZ                | FlhDC | CpxR  | FNR   |
| yjdF                     | FhIA  | AppY  | CaiF  |
| yjdJ                     | Fis   | CRP   | FNR   |
| yjdKO                    | CRP   | ChbR  | FNR   |
| yjdL                     | AraC  | ArcA  | CysB  |

|                                 |       |       |       |
|---------------------------------|-------|-------|-------|
| yjdM                            | ArcA  | CytR  | DeoR  |
| yjdN                            | CRP   | Fis   | IHF   |
| yjeFE-amiB-mutL-miaA-hfq-hflXKC | CpxR  | rpoH  | Fis   |
| yjeH                            | CpxR  | GadX  | PhoP  |
| yjeI                            | CpxR  | FlhDC | H-NS  |
| yjeJ                            | DsdC  | EvgA  | Fis   |
| yjeK                            | FlhDC | ArgR  | BaeR  |
| yjeM                            | Cbl   | Lacl  | PhoB  |
| yjeNO                           | ArgP  | GntR  | IdnR  |
| yjeS                            | CpxR  | DnaA  | Fis   |
| yjfI                            | AgaR  | AllS  | CsgD  |
| yjfN                            | CRP   | CpxR  | FNR   |
| yjfO                            | CRP   | FNR   | Fis   |
| yjfP                            | CsgD  | AraC  | CaiF  |
| yjfY                            | AllS  | CRP   | CpxR  |
| yjfZ                            | CdaR  | FlhDC | Fur   |
| yjgA                            | FNR   | Fis   | IHF   |
| yjgB                            | MarA  | SoxS  | NarL  |
| yjgF                            | CRP   | FNR   | IHF   |
| yjgH                            | PhoB  | ArcA  | Cbl   |
| yjgI                            | AgaR  | AscG  | CsgD  |
| yjgK                            | CRP   | FNR   | HcaR  |
| yjgN                            | GntR  | H-NS  | LexA  |
| yjgPQ                           | CpxR  | ArgR  | DicA  |
| yjgR                            | DicA  | GadX  | HU    |
| yjgW                            | CdaR  | H-NS  | LexA  |
| yjgZ                            | AraC  | CsgD  | EnvY  |
| yjhBC                           | CRP   | FNR   | FlhDC |
| yjhF                            | Cbl   | FlhDC | MetR  |
| yjhIHG                          | ArgR  | CRP   | CusR  |
| yjhP                            | AtoC  | Cbl   | CysB  |
| yjhR                            | LexA  | Fur   | NagC  |
| yjhS                            | NagC  | CdaR  | CysB  |
| yjhU                            | CpxR  | DicA  | FlhDC |
| yjhXQ                           | Rob   | Cbl   | MprA  |
| yjiC                            | AgaR  | RcsAB | TdcA  |
| yjiD                            | FNR   | Fur   | IHF   |
| yjiE                            | BaeR  | FhlA  | GlcC  |
| yjiJ                            | DnaA  | FlhDC | GntR  |
| yjiK                            | DgsA  | FlhDC | GntR  |
| yjiML                           | Rob   | ArcA  | Cbl   |
| yjiPQ                           | ArgP  | ArgR  | CpxR  |
| yjiR                            | Cbl   | DgsA  | GntR  |
| yjiT                            | H-NS  | IHF   | CpxR  |
| yjiXA                           | CRP   | FNR   | AcrR  |
| yjjB-dnaTC-yjjA                 | CpxR  | FlhDC | LexA  |
| yjjI                            | NarL  | FNR   | IHF   |
| yjjJ                            | AscG  | CpxR  | HyfR  |
| yjjK                            | CRP   | CpxR  | FNR   |
| yjjL                            | CpxR  | FlhDC | Fur   |
| yjjM                            | CRP   | CpxR  | FNR   |
| yjjP                            | CusR  | FlhDC | GntR  |
| yjjQ-bglJ                       | Fur   | Fis   | IHF   |
| yjjUV                           | Lrp   | CRP   | H-NS  |
| yjjW                            | FhlA  | LidR  | ModE  |
| yjjX                            | DnaA  | HyfR  | MarA  |
| yjjY                            | FNR   | CRP   | CpxR  |
| yjtD                            | AgaR  | BetI  | CpxR  |
| ykfA-yafZ                       | FlhDC | AllR  | DicA  |

|                       |       |       |       |
|-----------------------|-------|-------|-------|
| ykfC                  | ArgR  | Cbl   | DeoR  |
| ykfJ-prfH             | FadR  | GntR  | IdnR  |
| ykgA                  | AlIR  | CdaR  | FNR   |
| ykgC                  | AscG  | CpxR  | EvgA  |
| ykgD                  | CsgD  | GntR  | GutM  |
| ykgEFG                | CRP   | FNR   | IHF   |
| ykgH                  | AgaR  | GntR  | HcaR  |
| ykgIB                 | TdcA  | TdcR  | CRP   |
| ylaB                  | CpxR  | CytR  | H-NS  |
| ylaC                  | ArcA  | CRP   | FNR   |
| ylIEF                 | CpxR  | CsgD  | DgsA  |
| ylIG                  | CRP   | Fis   | IHF   |
| ylil                  | ArgR  | GntR  | IscR  |
| yliJ                  | FruR  | Nac   | NtrC  |
| ylil                  | CRP   | CsgD  | Fis   |
| ymbA                  | CaiF  | CdaR  | DgsA  |
| ymcE-gnsA             | AraC  | ArcA  | CRP   |
| ymdA                  | DeoR  | FNR   | FlhDC |
| ymdBC                 | FlhDC | ArgR  | CdaR  |
| ymdE-ycdU             | CpxR  | CsgD  | FhlA  |
| ymfA-ycfZ             | UxuR  | Cbl   | CpxR  |
| ymfED                 | CRP   | CysB  | FNR   |
| ymfH-xisE-intE        | ArcA  | CRP   | H-NS  |
| ymfI                  | CRP   | CdaR  | FNR   |
| ymfJ                  | AlIS  | ArcA  | CRP   |
| ymfK                  | CpxR  | FNR   | Fur   |
| ymfTLMNROPQ-ycfK-ymfS | LexA  | CRP   | AgaR  |
| ymgA-ariR             | IHF   | CRP   | CpxR  |
| ymgE                  | CRP   | Fis   | IHF   |
| ymgGD                 | FruR  | CRP   | DhaR  |
| ymjA                  | FNR   | FhlA  | Fis   |
| ymjC-mpaA             | CpxR  | CytR  | DeoR  |
| ynaA-lomR_1           | FlhDC | ArgR  | CpxR  |
| ynaE                  | ArcA  | CRP   | FNR   |
| ynaI                  | CpxR  | CRP   | Fis   |
| ynaJ                  | FNR   | ArcA  | CRP   |
| ynaK-ydaY             | FlhDC | AgaR  | Fur   |
| ynbABCD               | GntR  | RcsAB | CpxR  |
| yncA-ydcZ             | CpxR  | H-NS  | FadR  |
| yncB                  | CRP   | Fis   | H-NS  |
| yncC                  | CRP   | Fis   | PhoB  |
| yncE                  | CRP   | Fur   | FNR   |
| yncG                  | CpxR  | Fur   | IdnR  |
| yncl                  | CRP   | CpxR  | FNR   |
| yncJ                  | CpxR  | IscR  | ModE  |
| yncM                  | ArcA  | GntR  | IscR  |
| yncN-ydcQ             | DicA  | GcvA  | LexA  |
| yneHG                 | MarA  | SoxS  | ExuR  |
| yneI                  | CpxR  | FNR   | FruR  |
| yneJ                  | GadX  | MetJ  | NagC  |
| yneK                  | CpxR  | FlhDC | IscR  |
| yneL                  | CpxR  | FlhDC | GntR  |
| yneN-ydeO             | CpxR  | FlhDC | CRP   |
| ynfA                  | Cbl   | CdaR  | DeoR  |
| ynfB-speG             | CRP   | FNR   | ArcA  |
| ynfC                  | CRP   | CpxR  | DeoR  |
| ynfD                  | NtrC  | PhoB  | Fis   |
| ynfEFGH-dmsD          | FNR   | NarL  | IHF   |
| ynfM                  | FNR   | GadE  | IHF   |

|                |      |       |       |
|----------------|------|-------|-------|
| ynfN           | Cbl  | CdaR  | CpxR  |
| ynfO-ydfO      | CRP  | FNR   | FhlA  |
| ynhG           | CRP  | IHF   | Fis   |
| yniA           | CRP  | CpxR  | Fis   |
| yniB           | AraC | CaiF  | Fis   |
| yniC           | Cbl  | FhlA  | Fis   |
| ynjE           | ArcA | FNR   | IHF   |
| ynjF           | CRP  | FlhDC | IHF   |
| ynjH           | CaiF | CpxR  | FNR   |
| ynjI           | CpxR | FruR  | Fur   |
| yoaA           | FNR  | HcaR  | ModE  |
| yoaB           | CRP  | Fis   | Fur   |
| yoaC           | H-NS | CRP   | Fis   |
| yoaD           | CaiF | DhaR  | GntR  |
| yoaE           | ExuR | FlhDC | Fur   |
| yoaF           | AgaR | BetI  | FlhDC |
| yoaH           | Ada  | CaiF  | MarR  |
| yoaI           | CpxR | FhlA  | ModE  |
| yobA-yebZY     | Fis  | CRP   | H-NS  |
| yobB-exoX      | NagC | CpxR  | CusR  |
| yobD           | BaeR | CpxR  | FlhDC |
| yobF-cspC      | FNR  | CRP   | CpxR  |
| yodC           | ArcA | CRP   | IHF   |
| yodD           | Fis  | CRP   | FruR  |
| yoeE           | ArgR | CaiF  | Cbl   |
| yohC           | CRP  | DsdC  | FNR   |
| yohD           | SoxS | FadR  | FruR  |
| yohF           | SoxS | H-NS  | MarA  |
| yohJK          | Ada  | GadW  | MtlR  |
| yohN           | ArgR | FlhDC | H-NS  |
| yojI           | Fur  | CRP   | FNR   |
| ypdABC         | PhoB | SoxS  | DicA  |
| ypeA-yfeZ      | AraC | ArgR  | CpxR  |
| ypeC           | CpxR | FlhDC | Fur   |
| ypfG           | DicA | ModE  | NagC  |
| ypfH           | NagC | NarL  | PhoB  |
| ypfJI          | PhoB | Cbl   | FlhDC |
| yphA           | DeoR | DgsA  | Fis   |
| yphCB          | Rob  | Cbl   | CdaR  |
| yphFED         | GntR | Cbl   | CusR  |
| yphG           | FadR | GntR  | NagC  |
| yphH           | Ada  | DeoR  | GntR  |
| ypjC           | CpxR | Fis   | HyfR  |
| ypjD           | ArgR | CpxR  | Nac   |
| ypjL-yfjU      | CaiF | FhlA  | GlcC  |
| ypjM-yfjV      | AcrR | ArgR  | FlhDC |
| yqaBA          | ArgR | CpxR  | Fis   |
| yqaD           | ArgR | BetI  | GntR  |
| yqaE           | CRP  | EvgA  | FNR   |
| yqcC-truC-yqcA | AppY | CpxR  | GntR  |
| yqcE-ygcE      | NagC | CpxR  | CsgD  |
| yqeA           | AIIS | CaiF  | ChbR  |
| yqeB           | GalR | GalS  | GntR  |
| yqeC           | CRP  | CpxR  | GlpR  |
| yqeF           | Fis  | ArcA  | CRP   |
| yqeG           | CRP  | CpxR  | IHF   |
| yqfA           | CRP  | CpxR  | Fis   |
| yqgA           | AgaR | CaiF  | FhlA  |
| yqgD           | Fis  | FlhDC | IHF   |

|                     |      |       |       |
|---------------------|------|-------|-------|
| yqgEF               | IclR | AllS  | CpxR  |
| yqhA                | ArcA | ArgR  | FNR   |
| yqhC                | CpxR | MarA  | QseB  |
| yqhD                | ArcA | CRP   | FNR   |
| yqhG                | AgaR | FlhDC | GntR  |
| yqiC                | ArcA | CRP   | FNR   |
| yqiJK               | AgaR | CRP   | CpxR  |
| yqjAB               | CpxR | Fis   | ArgR  |
| yqjCDEK             | Fis  | IHF   | MarA  |
| yqjF                | AgaR | CpxR  | FruR  |
| yqjG                | CRP  | IHF   | NtrC  |
| yqjH                | CRP  | FNR   | Fur   |
| yqjI                | FNR  | ArcA  | CRP   |
| yraH                | AgaR | ArgR  | Cbl   |
| yraJK               | AgaR | CsgD  | HU    |
| yraL                | BaeR | CsiR  | FhlA  |
| yraM                | CpxR | FlhDC | Lrp   |
| yraN                | AllS | LldR  | PhoP  |
| yraP                | CpxR | Fis   | FlhDC |
| yraQ                | CdaR | CueR  | Fis   |
| yraR                | AppY | CynR  | DeoR  |
| yrbA                | Fis  | CRP   | CpxR  |
| yrbFEDCB            | Fis  | rpoH  | FNR   |
| yrbG-kdsD           | CpxR | Fis   | Fur   |
| yrbL                | PhoP | CRP   | CpxR  |
| yrdA                | AraC | CRP   | CpxR  |
| yrdD-rimN-aroE-yrdB | CpxR | FNR   | H-NS  |
| yrfF                | FruR | LexA  | MhpR  |
| yrfG-hslRO          | rpoH | CRP   | Fis   |
| yrbB                | AraC | LexA  | Lrp   |
| ysaA                | NarL | ExuR  | FNR   |
| ysgA                | FNR  | Lrp   | CRP   |
| ytfB                | CRP  | CpxR  | ExuR  |
| ytfE                | CRP  | FNR   | Fis   |
| ytfG                | AraC | AscG  | CaiF  |
| ytfI                | AllS | CRP   | ChbR  |
| ytfJ                | CRP  | Fis   | H-NS  |
| ytfK                | FNR  | ArcA  | CRP   |
| ytfL                | FadR | LexA  | Rob   |
| ytfMNP              | CpxR | ArgP  | ArgR  |
| ytfQRT-yjfF         | CRP  | Fis   | GntR  |
| ytjB-lplA           | AraC | AppY  | ArgR  |
| ytjC                | CpxR | FadR  | MarA  |
| yzcX                | CsgD | Fis   | MarA  |
| yzfA                | AcrR | AgaR  | CsgD  |
| zapA                | ArgR | CRP   | CpxR  |
| zinT                | Fur  | SoxS  | CRP   |
| zipA                | ArgR | FNR   | Fis   |
| zitB                | CytR | DeoR  | FlhDC |
| zntA                | CpxR | Fis   | IHF   |
| znuA                | Zur  | CRP   | FNR   |
| znuCB               | Zur  | CaiF  | CdaR  |
| zraSR               | Cbl  | AgaR  | AppY  |
| zupT                | CpxR | FhlA  | Fis   |
| zur                 | CpxR | CytR  | FruR  |
| zwf                 | MarA | Rob   | SoxS  |
