# Supplementary material for: Reconstruction of Escherichia coli transcriptional regulatory networks via regulon-based associations
Source: PubMed Central journal article supplement (PMC2689187; doi:10.1186/1752-0509-3-39), 2009-04-14

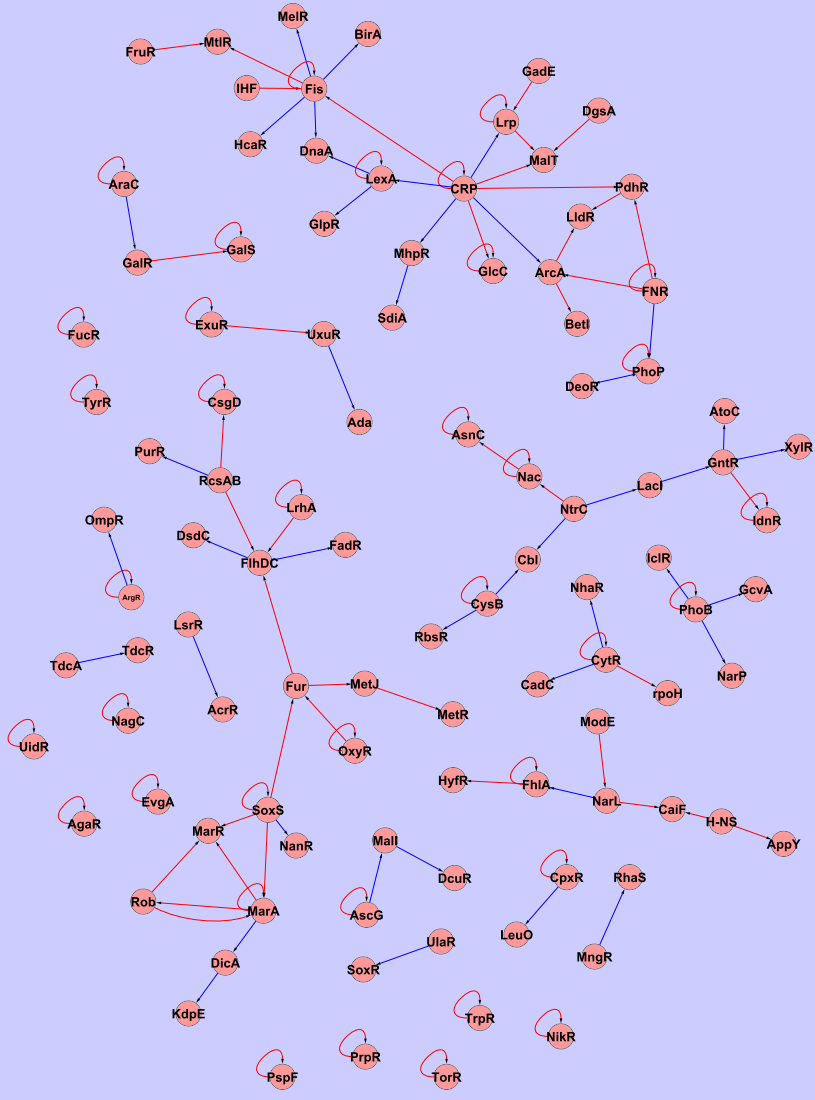

Supplement: 1752-0509-3-39-S5.pdf [file 1752-0509-3-39-S5.pdf]
